# Supplementary material
Source: HighWire-hosted journal article supplement (doi:10.1101/rna.079615.123)
Supplement: Supplemental_Data_S2.xlsx [file Supplemental_Data_S2.xlsx]

## Sheet: CONS_MOUSE_m6A_3UTR
Supplementary Data S2
The list of mouse conserved genes between mouse and chicken with m6A in the 3'UTR
To find conserved methylated transcripts between chicken and mouse we downloaded the complete gene list of all vertebrate homologues from MGI (http://www.informatics.jax.org/homology.shtml) and the peak files for mouse embryoid bodies from Geula et al.10 from REPIC (https://repicmod.uchicago.edu/repic)
HomoloGene ID	Common Organism Name	NCBI Taxon ID	Symbol	EntrezGene ID	Mouse MGI ID	Genetic Location	Genomic Coordinates (mouse: , human: )	Name	Synonyms
11793	mouse, laboratory	10090	2310057M21Rik	68277	MGI:1915527	Chr7 cM	Chr7:-(-)	RIKEN cDNA 2310057M21 gene	3110040E10Rik
11968	mouse, laboratory	10090	2410004B18Rik	66421	MGI:1913671	Chr3 cM	Chr3:-(+)	RIKEN cDNA 2410004B18 gene	4930572C24Rik
34730	mouse, laboratory	10090	2610507B11Rik	72503	MGI:1919753	Chr11 cM	Chr11:-(+)	RIKEN cDNA 2610507B11 gene	mKIAA0100
27867	mouse, laboratory	10090	4930453N24Rik	67609	MGI:1914859	Chr16 cM	Chr16:-(-)	RIKEN cDNA 4930453N24 gene	din
47588	mouse, laboratory	10090	4931428F04Rik	74356	MGI:1921606	Chr8 cM	Chr8:-(-)	RIKEN cDNA 4931428F04 gene
11648	mouse, laboratory	10090	Aagab	66939	MGI:1914189	Chr9 cM	Chr9:-(+)	alpha- and gamma-adaptin binding protein	2310007F21Rik
9170	mouse, laboratory	10090	Aar2	68295	MGI:1915545	Chr2 cM	Chr2:-(+)	AAR2 splicing factor homolog	0610011L14Rik
6474	mouse, laboratory	10090	Abcb10	56199	MGI:1860508	Chr8 cM	Chr8:-(-)	ATP-binding cassette, sub-family B (MDR/TAP), member 10	ABC-me
21408	mouse, laboratory	10090	Abcf2	27407	MGI:1351657	Chr5 cM	Chr5:-(-)	ATP-binding cassette, sub-family F (GCN20), member 2	0710005O05Rik|Drr3
50272	mouse, laboratory	10090	Abhd17a	216169	MGI:106388	Chr10 cM	Chr10:-(-)	abhydrolase domain containing 17A	1700013O15Rik|D10Bwg1364e|Fam108a|MGC:11699
23246	mouse, laboratory	10090	Abhd6	66082	MGI:1913332	Chr14 cM	Chr14:-(+)	abhydrolase domain containing 6	0610041D24Rik
3783	mouse, laboratory	10090	Abl1	11350	MGI:87859	Chr2 cM	Chr2:-(+)	c-abl oncogene 1, non-receptor tyrosine kinase	c-Abl|E430008G22Rik
31015	mouse, laboratory	10090	Acaca	107476	MGI:108451	Chr11 cM	Chr11:-(+)	acetyl-Coenzyme A carboxylase alpha	A530025K05Rik|Acac|Acc1|acetyl-CoA carboxylase|LOC327983
11977	mouse, laboratory	10090	Acot11	329910	MGI:1913736	Chr4 cM	Chr4:-(-)	acyl-CoA thioesterase 11	1110020M10Rik|2010309H15Rik|BFIT1|MGC:25974|mKIAA0707|Thea|Them1
110648	mouse, laboratory	10090	Actb	11461	MGI:87904	Chr5 cM	Chr5:-(-)	actin, beta	Actx|A-X actin-like protein|beta-actin|E430023M04Rik
20391	mouse, laboratory	10090	Acvr2a	11480	MGI:102806	Chr2 cM	Chr2:-(+)	activin receptor IIA	ActRIIa|Acvr2|tActRII
2395	mouse, laboratory	10090	Adam17	11491	MGI:1096335	Chr12 cM	Chr12:-(-)	a disintegrin and metallopeptidase domain 17	CD156b|Tace
2826	mouse, laboratory	10090	Adam23	23792	MGI:1345162	Chr1 cM	Chr1:-(+)	a disintegrin and metallopeptidase domain 23	MDC3
8610	mouse, laboratory	10090	Adamts15	235130	MGI:2449569	Chr9 cM	Chr9:-(-)	a disintegrin-like and metallopeptidase (reprolysin type) with thrombospondin type 1 motif, 15
8096	mouse, laboratory	10090	Adat1	30947	MGI:1353631	Chr8 cM	Chr8:-(-)	adenosine deaminase, tRNA-specific 1	mADAT1
13112	mouse, laboratory	10090	Adgra2	78560	MGI:1925810	Chr8 cM	Chr8:-(+)	adhesion G protein-coupled receptor A2	8430414O08Rik|9530074E10Rik|Gpr124|mKIAA1531|Tem5
1287	mouse, laboratory	10090	Adgrb1	107831	MGI:1933736	Chr15 cM	Chr15:-(+)	adhesion G protein-coupled receptor B1	B830018M07Rik|Bai1
22712	mouse, laboratory	10090	Adgrl2	99633	MGI:2139714	Chr3 cM	Chr3:-(-)	adhesion G protein-coupled receptor L2	Lec1|Lphh1|Lphn2|mKIAA0786
7617	mouse, laboratory	10090	Adnp	11538	MGI:1338758	Chr2 cM	Chr2:-(-)	activity-dependent neuroprotective protein	mKIAA0784
4340	mouse, laboratory	10090	Aff1	17355	MGI:1100819	Chr5 cM	Chr5:-(+)	AF4/FMR2 family, member 1	9630032B01Rik|Af4|Mllt2h|Rob
8683	mouse, laboratory	10090	Aff4	93736	MGI:2136171	Chr11 cM	Chr11:-(+)	AF4/FMR2 family, member 4	Alf4|Laf4l
10591	mouse, laboratory	10090	Agpat3	28169	MGI:1336186	Chr10 cM	Chr10:-(-)	1-acylglycerol-3-phosphate O-acyltransferase 3	D10Jhu12e|LPAAT3
27907	mouse, laboratory	10090	Agrn	11603	MGI:87961	Chr4 cM	Chr4:-(-)	agrin	Agrin|nmf380|NMF380
7621	mouse, laboratory	10090	Agtrap	11610	MGI:1339977	Chr4 cM	Chr4:-(-)	angiotensin II, type I receptor-associated protein	3300002E14Rik|Atrap|D4Wsu124e
7721	mouse, laboratory	10090	Aktip	14339	MGI:3693832	Chr8 cM	Chr8:-(-)	AKT interacting protein	Ft1
6030	mouse, laboratory	10090	Alg10b	380959	MGI:2146159	Chr15 cM	Chr15:-(+)	asparagine-linked glycosylation 10B (alpha-1,2-glucosyltransferase)	Deaf1|LOC380959|nse5
4393	mouse, laboratory	10090	Alkbh1	211064	MGI:2384034	Chr12 cM	Chr12:-(-)	alkB homolog 1, histone H2A dioxygenase	alkB|Alkbh|Nrp
18204	mouse, laboratory	10090	Ambra1	228361	MGI:2443564	Chr2 cM	Chr2:-(+)	autophagy/beclin 1 regulator 1	2310079H06Rik|D030051N19Rik|mKIAA1736
51852	mouse, laboratory	10090	Amer1	72345	MGI:1919595	ChrX cM	ChrX:-(-)	APC membrane recruitment 1	2810002O09Rik|Amer1|Fam123b|Wtx
10512	mouse, laboratory	10090	Anapc7	56317	MGI:1929711	Chr5 cM	Chr5:-(+)	anaphase promoting complex subunit 7	APC7|prediabetic NOD sera-reactive autoantigen
10755	mouse, laboratory	10090	Angptl4	57875	MGI:1888999	Chr17 cM	Chr17:-(-)	angiopoietin-like 4	BK89|FIAF|HFARP|NG27
9768	mouse, laboratory	10090	Ankrd10	102334	MGI:1921840	Chr8 cM	Chr8:-(-)	ankyrin repeat domain 10	4833425P12Rik
69134	mouse, laboratory	10090	Ankrd11	77087	MGI:1924337	Chr8 cM	Chr8:-(-)	ankyrin repeat domain 11	2410104C19Rik|3010027A04Rik|9530048I21Rik|Yod
35374	mouse, laboratory	10090	Ankrd28	105522	MGI:2145661	Chr14 cM	Chr14:-(-)	ankyrin repeat domain 28	E430019N21Rik
8967	mouse, laboratory	10090	Ankrd6	140577	MGI:2154278	Chr4 cM	Chr4:-(-)	ankyrin repeat domain 6	diversin
30950	mouse, laboratory	10090	Apc	11789	MGI:88039	Chr18 cM	Chr18:-(+)	APC, WNT signaling pathway regulator	adenomatosis polyposis coli|CC1|Min
77420	mouse, laboratory	10090	Apcdd1	494504	MGI:3513977	Chr18 cM	Chr18:-(+)	adenomatosis polyposis coli down-regulated 1	Drapc1|EIG180
1250	mouse, laboratory	10090	Arcn1	213827	MGI:2387591	Chr9 cM	Chr9:-(-)	archain 1	4632432M07Rik|delta-COP|nur17|pale coat neuro
23089	mouse, laboratory	10090	Arhgap12	75415	MGI:1922665	Chr18 cM	Chr18:-(-)	Rho GTPase activating protein 12	2810011M08Rik
9984	mouse, laboratory	10090	Arhgap17	70497	MGI:1917747	Chr7 cM	Chr7:-(-)	Rho GTPase activating protein 17	5730403H17Rik|Nadrin|Nadrin2|Rich1|WBP15
45715	mouse, laboratory	10090	Arhgap27	544817	MGI:1916903	Chr11 cM	Chr11:-(-)	Rho GTPase activating protein 27	2310069I04Rik|5730442P18Rik|Sh3d20
35136	mouse, laboratory	10090	Arhgap35	232906	MGI:1929494	Chr7 cM	Chr7:-(-)	Rho GTPase activating protein 35	6430596G11Rik|Grlf1|p190A|p190RhoGAP|P190 RhoGAP
907	mouse, laboratory	10090	Arhgap5	11855	MGI:1332637	Chr12 cM	Chr12:-(+)	Rho GTPase activating protein 5	p190B|p190-B
7630	mouse, laboratory	10090	Arhgap6	11856	MGI:1196332	ChrX cM	ChrX:-(+)	Rho GTPase activating protein 6	RhoGAPX-1
9088	mouse, laboratory	10090	Arhgef12	69632	MGI:1916882	Chr9 cM	Chr9:-(-)	Rho guanine nucleotide exchange factor (GEF) 12	2310014B11Rik|LARG|mKIAA0382
41329	mouse, laboratory	10090	Arhgef3	71704	MGI:1918954	Chr14 cM	Chr14:-(+)	Rho guanine nucleotide exchange factor (GEF) 3	1200004I24Rik|9830169H03Rik|C76747
2895	mouse, laboratory	10090	Arhgef7	54126	MGI:1860493	Chr8 cM	Chr8:-(+)	Rho guanine nucleotide exchange factor (GEF7)	betaPix|betaPix-b|betaPix-c|Cool|cool-1|p85SPR|Pak interacting exchange factor|PIX
124247	mouse, laboratory	10090	Arid3a	13496	MGI:1328360	Chr10 cM	Chr10:-(+)	AT rich interactive domain 3A (BRIGHT-like)	Bright|Dri1
12847	mouse, laboratory	10090	Arid4b	94246	MGI:2137512	Chr13 cM	Chr13:-(+)	AT rich interactive domain 4B (RBP1-like)	6330417L24Rik|6720480E17Rik|BRCAA1|RBBP1L1|Rbp1l1|SAP180
45872	mouse, laboratory	10090	Arid5b	71371	MGI:2175912	Chr10 cM	Chr10:-(-)	AT rich interactive domain 5B (MRF1-like)	5430435G07Rik|Desrt|Mrf2|Mrf2alpha|Mrf2beta
4193	mouse, laboratory	10090	Arl4c	320982	MGI:2445172	Chr1 cM	Chr1:-(-)	ADP-ribosylation factor-like 4C	A630084M22Rik|Arl7
14121	mouse, laboratory	10090	Armc6	76813	MGI:1924063	Chr8 cM	Chr8:-(-)	armadillo repeat containing 6	2410153K17Rik
69318	mouse, laboratory	10090	Arrdc3	105171	MGI:2145242	Chr13 cM	Chr13:-(+)	arrestin domain containing 3	mKIAA1376
41636	mouse, laboratory	10090	Arrdc4	66412	MGI:1913662	Chr7 cM	Chr7:-(-)	arrestin domain containing 4	2410003C09Rik
44428	mouse, laboratory	10090	Arsi	545260	MGI:2670959	Chr18 cM	Chr18:-(+)	arylsulfatase i
7684	mouse, laboratory	10090	Asap1	13196	MGI:1342335	Chr15 cM	Chr15:-(-)	ArfGAP with SH3 domain, ankyrin repeat and PH domain1	Ddef1|mKIAA1249
34130	mouse, laboratory	10090	Asb7	117589	MGI:2152835	Chr7 cM	Chr7:-(-)	ankyrin repeat and SOCS box-containing 7	Asb-7|D030055C23Rik
10225	mouse, laboratory	10090	Ash1l	192195	MGI:2183158	Chr3 cM	Chr3:-(+)	ASH1 like histone lysine methyltransferase	8030453L17Rik|chromatin remodeling factor|E430018P19Rik|KMT2H
9098	mouse, laboratory	10090	Asxl1	228790	MGI:2684063	Chr2 cM	Chr2:-(+)	ASXL transcriptional regulator 1	mKIAA0978
10102	mouse, laboratory	10090	Asxl2	75302	MGI:1922552	Chr12 cM	Chr12:-(+)	ASXL transcriptional regulator 2	4930556B16Rik|mKIAA1685
86351	mouse, laboratory	10090	Atad2b	320817	MGI:2444798	Chr12 cM	Chr12:-(+)	ATPase family, AAA domain containing 2B	1110014E10Rik|D530031C13Rik
1265	mouse, laboratory	10090	Atf3	11910	MGI:109384	Chr1 cM	Chr1:-(-)	activating transcription factor 3	LRG-21
10051	mouse, laboratory	10090	Atf7ip	54343	MGI:1858965	Chr6 cM	Chr6:-(+)	activating transcription factor 7 interacting protein	2610204M12Rik|AM|ATFa-associated Modulator|Mcaf1
3566	mouse, laboratory	10090	Atg5	11793	MGI:1277186	Chr10 cM	Chr10:-(+)	autophagy related 5	2010107M05Rik|3110067M24Rik|Apg5l|Paddy
56949	mouse, laboratory	10090	Atl2	56298	MGI:1929492	Chr17 cM	Chr17:-(-)	atlastin GTPase 2	2010110I21Rik|Aip-2|Arl6ip2
30952	mouse, laboratory	10090	Atm	11920	MGI:107202	Chr9 cM	Chr9:-(-)	ataxia telangiectasia mutated	C030026E19Rik
35321	mouse, laboratory	10090	Atmin	234776	MGI:2682328	Chr8 cM	Chr8:-(+)	ATM interactor	Asciz|gpg6|MGC:79206|mKIAA0431
55597	mouse, laboratory	10090	Atp2b1	67972	MGI:104653	Chr10 cM	Chr10:-(+)	ATPase, Ca++ transporting, plasma membrane 1	2810442I22Rik|E130111D10Rik|PMCA1
48034	mouse, laboratory	10090	Atp2b4	381290	MGI:88111	Chr1 cM	Chr1:-(-)	ATPase, Ca++ transporting, plasma membrane 4	PMCA4
3444	mouse, laboratory	10090	Atp6v0d1	11972	MGI:1201778	Chr8 cM	Chr8:-(-)	ATPase, H+ transporting, lysosomal V0 subunit D1	Ac39|Atp6d|lysosomal 38kDa|P39|Vma6
22907	mouse, laboratory	10090	Auts2	319974	MGI:1919847	Chr5 cM	Chr5:-(-)	autism susceptibility candidate 2	2700063G02Rik|A730011F23Rik|D830032G16Rik
27085	mouse, laboratory	10090	AW549877	106064	MGI:2146232	Chr15 cM	Chr15:-(-)	expressed sequence AW549877
2614	mouse, laboratory	10090	Axin1	12005	MGI:1096327	Chr17 cM	Chr17:-(+)	axin 1
8443	mouse, laboratory	10090	Azi2	27215	MGI:1351332	Chr9 cM	Chr9:-(+)	5-azacytidine induced gene 2	AZ2
17572	mouse, laboratory	10090	B230219D22Rik	78521	MGI:1925771	Chr13 cM	Chr13:-(+)	RIKEN cDNA B230219D22 gene	D530037I19Rik
4797	mouse, laboratory	10090	B3gnt2	53625	MGI:1889505	Chr11 cM	Chr11:-(-)	UDP-GlcNAc:betaGal beta-1,3-N-acetylglucosaminyltransferase 2	B3Galt6|B3gnt1
17049	mouse, laboratory	10090	B3gnt7	227327	MGI:2384394	Chr1 cM	Chr1:-(+)	UDP-GlcNAc:betaGal beta-1,3-N-acetylglucosaminyltransferase 7	beta-3GnT7|C330001H22Rik
13250	mouse, laboratory	10090	B3gnt9	97440	MGI:2142841	Chr8 cM	Chr8:-(-)	UDP-GlcNAc:betaGal beta-1,3-N-acetylglucosaminyltransferase 9	B3gnt9-ps
2804	mouse, laboratory	10090	B4galt2	53418	MGI:1858493	Chr4 cM	Chr4:-(-)	UDP-Gal:betaGlcNAc beta 1,4- galactosyltransferase, polypeptide 2
37848	mouse, laboratory	10090	B4galt4	56375	MGI:1928387	Chr16 cM	Chr16:-(+)	UDP-Gal:betaGlcNAc beta 1,4-galactosyltransferase, polypeptide 4	9130402O08Rik
3507	mouse, laboratory	10090	B4galt5	56336	MGI:1927169	Chr2 cM	Chr2:-(-)	UDP-Gal:betaGlcNAc beta 1,4-galactosyltransferase, polypeptide 5	9430078I07Rik
3506	mouse, laboratory	10090	B4galt6	56386	MGI:1928380	Chr18 cM	Chr18:-(-)	UDP-Gal:betaGlcNAc beta 1,4-galactosyltransferase, polypeptide 6
3162	mouse, laboratory	10090	Bag3	29810	MGI:1352493	Chr7 cM	Chr7:-(+)	BCL2-associated athanogene 3	Bcl-2-interacting death suppressor|Bis
9635	mouse, laboratory	10090	Banp	53325	MGI:1889023	Chr8 cM	Chr8:-(+)	BTG3 associated nuclear protein	SMAR1
400	mouse, laboratory	10090	Bard1	12021	MGI:1328361	Chr1 cM	Chr1:-(-)	BRCA1 associated RING domain 1	ENSMUSG00000060893|ENSMUSG00000073653
22651	mouse, laboratory	10090	Baz1b	22385	MGI:1353499	Chr5 cM	Chr5:-(+)	bromodomain adjacent to zinc finger domain, 1B	Wbscr9|WSTF
10634	mouse, laboratory	10090	Bbx	70508	MGI:1917758	Chr16 cM	Chr16:-(-)	bobby sox HMG box containing	5530401J07Rik|5730403O13Rik
9111	mouse, laboratory	10090	Bcl2l13	94044	MGI:2136959	Chr6 cM	Chr6:-(+)	BCL2-like 13 (apoptosis facilitator)	BCL-RAMBO|E430016C20Rik|MGC:38758|Mil1|Mil-1
3191	mouse, laboratory	10090	Bcl9	77578	MGI:1924828	Chr3 cM	Chr3:-(-)	B cell CLL/lymphoma 9	2610202E01Rik|8030475K17Rik|A330041G23Rik
10829	mouse, laboratory	10090	Begain	380785	MGI:3044626	Chr12 cM	Chr12:-(-)	brain-enriched guanylate kinase-associated	LOC380785
19511	mouse, laboratory	10090	Bend3	331623	MGI:2677212	Chr10 cM	Chr10:-(+)	BEN domain containing 3	mKIAA1553
52626	mouse, laboratory	10090	Bend4	666938	MGI:3648414	Chr5 cM	Chr5:-(-)	BEN domain containing 4	D330027G24Rik|EG666938
10293	mouse, laboratory	10090	Bet1l	54399	MGI:1913128	Chr7 cM	Chr7:-(-)	Bet1 golgi vesicular membrane trafficking protein like	2610021K23Rik|golgi SNARE|Gs15
7248	mouse, laboratory	10090	Birc6	12211	MGI:1276108	Chr17 cM	Chr17:-(+)	baculoviral IAP repeat-containing 6	A430032G04Rik|A430040A19Rik|apollon|Bruce|D630005A10Rik
38217	mouse, laboratory	10090	Blcap	53619	MGI:1858907	Chr2 cM	Chr2:-(-)	bladder cancer associated protein	Bc10
14130	mouse, laboratory	10090	Bmf	171543	MGI:2176433	Chr2 cM	Chr2:-(-)	BCL2 modifying factor
3797	mouse, laboratory	10090	Bmi1	12151	MGI:88174	Chr2 cM	Chr2:-(+)	Bmi1 polycomb ring finger oncogene	Bmi1|Bmi-1|Pcgf4
34134	mouse, laboratory	10090	Bmp2k	140780	MGI:2155456	Chr5 cM	Chr5:-(+)	BMP2 inducible kinase	4933417M22Rik|BIKE
20911	mouse, laboratory	10090	Bmpr1a	12166	MGI:1338938	Chr14 cM	Chr14:-(-)	bone morphogenetic protein receptor, type 1A	1110037I22Rik|ALK3|Bmpr|BMPR-IA
7065	mouse, laboratory	10090	Bms1	213895	MGI:2446132	Chr6 cM	Chr6:-(-)	BMS1, ribosome biogenesis factor	Bms1l|mKIAA0187
34695	mouse, laboratory	10090	Bmt2	101148	MGI:2141466	Chr6 cM	Chr6:-(-)	base methyltransferase of 25S rRNA 2	B630005N14Rik
4926	mouse, laboratory	10090	Brap	72399	MGI:1919649	Chr5 cM	Chr5:-(+)	BRCA1 associated protein	3010002G07Rik
41	mouse, laboratory	10090	Brca2	12190	MGI:109337	Chr5 cM	Chr5:-(+)	breast cancer 2, early onset	Fancd1|RAB163
74540	mouse, laboratory	10090	Brd2	14312	MGI:99495	Chr17 cM	Chr17:-(-)	bromodomain containing 2	D17H6S113E|Frg-1|Fsrg1|Ring3|Rnf3
10127	mouse, laboratory	10090	Brf2	66653	MGI:1913903	Chr8 cM	Chr8:-(-)	BRF2, RNA polymerase III transcription initiation factor 50kDa subunit	2700059M06Rik|5730512K07Rik|BRFU|TFIIIB50
50955	mouse, laboratory	10090	Bri3bp	76809	MGI:1924059	Chr5 cM	Chr5:-(+)	Bri3 binding protein	2410150I18Rik
18736	mouse, laboratory	10090	Brwd3	382236	MGI:3029414	ChrX cM	ChrX:-(-)	bromodomain and WD repeat domain containing 3	Brodl|D030064D06Rik|LOC236955
32386	mouse, laboratory	10090	Bsdc1	100383	MGI:1913466	Chr4 cM	Chr4:-(+)	BSD domain containing 1	1110063F24Rik
41967	mouse, laboratory	10090	Btbd6	399566	MGI:3026623	Chr12 cM	Chr12:-(+)	BTB (POZ) domain containing 6
14995	mouse, laboratory	10090	Btbd9	224671	MGI:1916625	Chr17 cM	Chr17:-(-)	BTB (POZ) domain containing 9	1700023F20Rik
37521	mouse, laboratory	10090	Btg1	12226	MGI:88215	Chr10 cM	Chr10:-(+)	BTG anti-proliferation factor 1
31406	mouse, laboratory	10090	Btg2	12227	MGI:108384	Chr1 cM	Chr1:-(-)	BTG anti-proliferation factor 2	APRO1|Pc3|TIS21
10599	mouse, laboratory	10090	C1galt1	94192	MGI:2151071	Chr6 cM	Chr6:-(+)	core 1 synthase, glycoprotein-N-acetylgalactosamine 3-beta-galactosyltransferase, 1	2210410E06Rik|core 1 beta3-Gal-T|T-synthase
18368	mouse, laboratory	10090	C2cd2	207781	MGI:1891883	Chr16 cM	Chr16:-(-)	C2 calcium-dependent domain containing 2	5830404H04Rik|ORF25
41182	mouse, laboratory	10090	Cacfd1	381356	MGI:1924317	Chr2 cM	Chr2:-(+)	calcium channel flower domain containing 1	5930434B04Rik|mFwe
10854	mouse, laboratory	10090	Cachd1	320508	MGI:2444177	Chr4 cM	Chr4:-(+)	cache domain containing 1	1190007F10Rik|B430218L07Rik|Vwcd1
578	mouse, laboratory	10090	Cacna1d	12289	MGI:88293	Chr14 cM	Chr14:-(-)	calcium channel, voltage-dependent, L type, alpha 1D subunit	8430418G19Rik|C79217|Cacnl1a2|Cav1.3alpha1|Cchl1a|Cchl1a2|D-LTCC
579	mouse, laboratory	10090	Cacna2d1	12293	MGI:88295	Chr5 cM	Chr5:-(+)	calcium channel, voltage-dependent, alpha2/delta subunit 1	Cacna2|Ca(v)alpha2delta1|Cchl2a
69553	mouse, laboratory	10090	Cactin	70312	MGI:1917562	Chr10 cM	Chr10:-(+)	cactin, spliceosome C complex subunit	2510012J08Rik
121858	mouse, laboratory	10090	Camk1d	227541	MGI:2442190	Chr2 cM	Chr2:-(-)	calcium/calmodulin-dependent protein kinase ID	A630059D12Rik|CaMKIdelta|CKLiK|E030025C11Rik
19202	mouse, laboratory	10090	Camsap1	227634	MGI:3036242	Chr2 cM	Chr2:-(-)	calmodulin regulated spectrin-associated protein 1	9530003A05Rik|PRO2405
4310	mouse, laboratory	10090	Caprin1	53872	MGI:1858234	Chr2 cM	Chr2:-(-)	cell cycle associated protein 1	caprin-1|Gpiap1|MMGPIP137|RNG105
11689	mouse, laboratory	10090	Carf	241066	MGI:2182269	Chr1 cM	Chr1:-(+)	calcium response factor	Als2cr8
1328	mouse, laboratory	10090	Cars	27267	MGI:1351477	Chr7 cM	Chr7:-(-)	cysteinyl-tRNA synthetase	CA3
3733	mouse, laboratory	10090	Cbfa2t2	12396	MGI:1333833	Chr2 cM	Chr2:-(+)	CBFA2/RUNX1 translocation partner 2	C330013D05Rik|Cbfa2t2h|MTGR1
15856	mouse, laboratory	10090	Cblb	208650	MGI:2146430	Chr16 cM	Chr16:-(+)	Casitas B-lineage lymphoma b	Cbl-b
89116	mouse, laboratory	10090	Cbx1	12412	MGI:105369	Chr11 cM	Chr11:-(+)	chromobox 1	Cbx-rs2|E430007M08Rik|HP1B|Hp1beta|M31|MOD1
11482	mouse, laboratory	10090	Ccdc127	67433	MGI:1914683	Chr13 cM	Chr13:-(+)	coiled-coil domain containing 127	0610011N22Rik|5430420E17Rik
12074	mouse, laboratory	10090	Ccdc43	52715	MGI:1289318	Chr11 cM	Chr11:-(-)	coiled-coil domain containing 43	2610001E01Rik|D11Ertd707e
11288	mouse, laboratory	10090	Ccdc71	72454	MGI:1919704	Chr9 cM	Chr9:-(+)	coiled-coil domain containing 71	2600016J21Rik
11848	mouse, laboratory	10090	Ccdc92	215707	MGI:106485	Chr5 cM	Chr5:-(-)	coiled-coil domain containing 92	D5Bwg0834e
1335	mouse, laboratory	10090	Ccnf	12449	MGI:102551	Chr17 cM	Chr17:-(-)	cyclin F	CycF|Fbxo1
11588	mouse, laboratory	10090	Ccnjl	380694	MGI:2685723	Chr11 cM	Chr11:-(+)	cyclin J-like	LOC380694
3426	mouse, laboratory	10090	Cdc23	52563	MGI:1098815	Chr18 cM	Chr18:-(-)	CDC23 cell division cycle 23	D18Ertd243e
1355	mouse, laboratory	10090	Cdc25a	12530	MGI:103198	Chr9 cM	Chr9:-(+)	cell division cycle 25A	D9Ertd393e
55765	mouse, laboratory	10090	Cdc42bpa	226751	MGI:2441841	Chr1 cM	Chr1:-(+)	CDC42 binding protein kinase alpha	A930014J19Rik|DMPK-like
31166	mouse, laboratory	10090	Cdc7	12545	MGI:1309511	Chr5 cM	Chr5:-(+)	cell division cycle 7 (S. cerevisiae)	Cdc7|Cdc7l1|muCdc7
11276	mouse, laboratory	10090	Cdcp1	109332	MGI:2442010	Chr9 cM	Chr9:-(-)	CUB domain containing protein 1	9030022E12Rik|E030027H19Rik
21027	mouse, laboratory	10090	Cdh6	12563	MGI:107435	Chr15 cM	Chr15:-(-)	cadherin 6	cad6|K-cadherin
22862	mouse, laboratory	10090	Cdk19	78334	MGI:1925584	Chr10 cM	Chr10:-(+)	cyclin-dependent kinase 19	2700084L06Rik|Cdc2l6|mKIAA1028
45673	mouse, laboratory	10090	Cdpf1	72355	MGI:1919605	Chr15 cM	Chr15:-(-)	cysteine rich, DPF motif domain containing 1	2210021J22Rik
7262	mouse, laboratory	10090	Cdr2	12585	MGI:1100885	Chr7 cM	Chr7:-(-)	cerebellar degeneration-related 2
133862	mouse, laboratory	10090	Cdv3	321022	MGI:2448759	Chr9 cM	Chr9:-(-)	carnitine deficiency-associated gene expressed in ventricle 3	2510010F10Rik|C230084J24Rik|TPP36
64662	mouse, laboratory	10090	Cecr2	330409	MGI:1923799	Chr6 cM	Chr6:-(+)	CECR2, histone acetyl-lysine reader	2610101O16Rik|2810409N01Rik|cat eye syndrome chromosome region, candidate 2|Gtl4|mKIAA1740
75172	mouse, laboratory	10090	Celf5	319586	MGI:2442333	Chr10 cM	Chr10:-(-)	CUGBP, Elav-like family member 5	4930565A21Rik|Brunol5
19618	mouse, laboratory	10090	Cenpl	70454	MGI:1917704	Chr1 cM	Chr1:-(+)	centromere protein L	2610300B10Rik
11438	mouse, laboratory	10090	Cenpm	66570	MGI:1913820	Chr15 cM	Chr15:-(-)	centromere protein M	2610019I03Rik
12065	mouse, laboratory	10090	Cep19	66994	MGI:1914244	Chr16 cM	Chr16:-(+)	centrosomal protein 19	1500031L02Rik
38286	mouse, laboratory	10090	Cep250	16328	MGI:108084	Chr2 cM	Chr2:-(+)	centrosomal protein 250	B230210E21Rik|Cep2|Inmp
8879	mouse, laboratory	10090	Cep350	74081	MGI:1921331	Chr1 cM	Chr1:-(-)	centrosomal protein 350	4933409L06Rik|6430546F08Rik
8790	mouse, laboratory	10090	Cep57	74360	MGI:1915551	Chr9 cM	Chr9:-(-)	centrosomal protein 57	3110002L15Rik|4921510P06Rik|4931428M20Rik|mKIAA0092|Tsp57
11254	mouse, laboratory	10090	Cep85	70012	MGI:1917262	Chr4 cM	Chr4:-(-)	centrosomal protein 85	2410030J07Rik|Ccdc21
23634	mouse, laboratory	10090	Cers5	71949	MGI:1919199	Chr15 cM	Chr15:-(-)	ceramide synthase 5	2310081H14Rik|CerS5|Lass5|Trh4
14846	mouse, laboratory	10090	Chchd4	72170	MGI:1919420	Chr6 cM	Chr6:-(-)	coiled-coil-helix-coiled-coil-helix domain containing 4	2410012P20Rik|2810014D17Rik
68174	mouse, laboratory	10090	Chd1	12648	MGI:88393	Chr17 cM	Chr17:-(+)	chromodomain helicase DNA binding protein 1	4930525N21Rik
37462	mouse, laboratory	10090	Chd2	244059	MGI:2448567	Chr7 cM	Chr7:-(-)	chromodomain helicase DNA binding protein 2	2810013C04Rik|2810040A01Rik|5630401D06Rik
19067	mouse, laboratory	10090	Chd7	320790	MGI:2444748	Chr4 cM	Chr4:-(+)	chromodomain helicase DNA binding protein 7	A730019I05Rik|Cycn|Cyn|Dz|Edy|Flo|GENA 47|Gena 52|GENA 60|Lda|Mt|Obt|Todo|WBE1|Whi
11844	mouse, laboratory	10090	Chd9	109151	MGI:1924001	Chr8 cM	Chr8:-(+)	chromodomain helicase DNA binding protein 9	1810014J18Rik|9030205D12Rik|A330063D19Rik|AD013|mKIAA0308
41174	mouse, laboratory	10090	Chrac1	93696	MGI:2135796	Chr15 cM	Chr15:-(+)	chromatin accessibility complex 1	2410152E03Rik|2810406L04Rik|YCL1
21013	mouse, laboratory	10090	Chst10	98388	MGI:2138283	Chr1 cM	Chr1:-(-)	carbohydrate sulfotransferase 10	Hnk-1st|ST
41483	mouse, laboratory	10090	Chst8	68947	MGI:1916197	Chr7 cM	Chr7:-(-)	carbohydrate sulfotransferase 8	1500011J21Rik|GalNAc4ST-1
84588	mouse, laboratory	10090	Chtf8	214987	MGI:2443370	Chr8 cM	Chr8:-(-)	CTF8, chromosome transmission fidelity factor 8	5830457O10Rik
4433	mouse, laboratory	10090	Cited2	17684	MGI:1306784	Chr10 cM	Chr10:-(+)	Cbp/p300-interacting transactivator, with Glu/Asp-rich carboxy-terminal domain, 2	Mrg1|Msg2|p35srj
9032	mouse, laboratory	10090	Clcc1	229725	MGI:2385186	Chr3 cM	Chr3:-(+)	chloride channel CLIC-like 1	Mclc
73872	mouse, laboratory	10090	Clcn5	12728	MGI:99486	ChrX cM	ChrX:-(-)	chloride channel, voltage-sensitive 5	5430408K11Rik|Clc4-1|Clc5|ClC-5|Clcn4-1|D930009B12Rik|DXImx42e|Sfc13
20718	mouse, laboratory	10090	Clip2	269713	MGI:1313136	Chr5 cM	Chr5:-(-)	CAP-GLY domain containing linker protein 2	CLIP-115|Cyln2|WSCR4
11705	mouse, laboratory	10090	Clmp	71566	MGI:1918816	Chr9 cM	Chr9:-(+)	CXADR-like membrane protein	9030425E11Rik
10340	mouse, laboratory	10090	Cln8	26889	MGI:1349447	Chr8 cM	Chr8:-(+)	CLN8 transmembrane ER and ERGIC protein	ceroid-lipofuscinosis, neuronal 8|Tlcd6
8814	mouse, laboratory	10090	Clstn1	65945	MGI:1929895	Chr4 cM	Chr4:-(+)	calsyntenin 1	1810034E21Rik|alcadein alpha|calsyntenin-1|Cst-1
45211	mouse, laboratory	10090	Cmtm4	97487	MGI:2142888	Chr8 cM	Chr8:-(-)	CKLF-like MARVEL transmembrane domain containing 4	Cklfsf4
994	mouse, laboratory	10090	Cnga3	12790	MGI:1341818	Chr1 cM	Chr1:-(+)	cyclic nucleotide gated channel alpha 3	CNG3
9761	mouse, laboratory	10090	Cnnm2	94219	MGI:2151054	Chr19 cM	Chr19:-(+)	cyclin M2	Acdp2
40953	mouse, laboratory	10090	Cnot2	72068	MGI:1919318	Chr10 cM	Chr10:-(-)	CCR4-NOT transcription complex, subunit 2	2600016M12Rik|2810470K03Rik
3973	mouse, laboratory	10090	Cnot9	58184	MGI:1928902	Chr1 cM	Chr1:-(+)	CCR4-NOT transcription complex, subunit 9	2610007F23Rik|FL10|Rqcd1
17139	mouse, laboratory	10090	Cnst	226744	MGI:2445141	Chr1 cM	Chr1:-(+)	consortin, connexin sorting protein	9630058J23Rik
7155	mouse, laboratory	10090	Cog4	102339	MGI:2142808	Chr8 cM	Chr8:-(+)	component of oligomeric golgi complex 4	D8Ertd515e
55434	mouse, laboratory	10090	Col5a1	12831	MGI:88457	Chr2 cM	Chr2:-(+)	collagen, type V, alpha 1
1392	mouse, laboratory	10090	Col6a2	12834	MGI:88460	Chr10 cM	Chr10:-(-)	collagen, type VI, alpha 2	Col6a-2
8548	mouse, laboratory	10090	Commd5	66398	MGI:1913648	Chr15 cM	Chr15:-(+)	COMM domain containing 5	2310065H03Rik|D15Ertd81e|Hcarg
56537	mouse, laboratory	10090	Coro1c	23790	MGI:1345964	Chr5 cM	Chr5:-(-)	coronin, actin binding protein 1C	coronin 3|CRN2
6460	mouse, laboratory	10090	Cpsf2	51786	MGI:1861601	Chr12 cM	Chr12:-(+)	cleavage and polyadenylation specific factor 2	100kDa|2610024B04Rik|Cpsf|mKIAA1367
3223	mouse, laboratory	10090	Creb1	12912	MGI:88494	Chr1 cM	Chr1:-(+)	cAMP responsive element binding protein 1	2310001E10Rik|3526402H21Rik|Creb|Creb-1
84591	mouse, laboratory	10090	Crem	12916	MGI:88495	Chr18 cM	Chr18:-(-)	cAMP responsive element modulator	ICER
81850	mouse, laboratory	10090	Crk	12928	MGI:88508	Chr11 cM	Chr11:-(+)	v-crk avian sarcoma virus CT10 oncogene homolog	Crk-I|Crk-II|Crk-III|Crko|proto-oncogene c-crk
38021	mouse, laboratory	10090	Crkl	12929	MGI:104686	Chr16 cM	Chr16:-(+)	v-crk avian sarcoma virus CT10 oncogene homolog-like	1110025F07Rik|Crkol|snoop
74841	mouse, laboratory	10090	Csnk1d	104318	MGI:1355272	Chr11 cM	Chr11:-(-)	casein kinase 1, delta	1200006A05Rik
48692	mouse, laboratory	10090	Csnk1g1	214897	MGI:2660884	Chr9 cM	Chr9:-(+)	casein kinase 1, gamma 1	9130020E21Rik
32743	mouse, laboratory	10090	Csrnp2	207785	MGI:2386852	Chr15 cM	Chr15:-(-)	cysteine-serine-rich nuclear protein 2	CSRNP-2|MGC:28165
1015	mouse, laboratory	10090	Ctbp1	13016	MGI:1201685	Chr5 cM	Chr5:-(-)	C-terminal binding protein 1	BARS|CtBP1-L|CtBP1-S|CtBP3/BARS|D4S115h|D5H4S115|D5H4S115E
48881	mouse, laboratory	10090	Ctdspl	69274	MGI:1916524	Chr9 cM	Chr9:-(+)	CTD (carboxy-terminal domain, RNA polymerase II, polypeptide A) small phosphatase-like	2810418J22Rik|HYA22|SCP3
1017	mouse, laboratory	10090	Ctnnd1	12388	MGI:105100	Chr2 cM	Chr2:-(-)	catenin (cadherin associated protein), delta 1	Catns|Ctnnd|mKIAA0384|P120|p120-catenin
36371	mouse, laboratory	10090	Cttnbp2nl	80281	MGI:1933137	Chr3 cM	Chr3:-(-)	CTTNBP2 N-terminal like	MGC:7720|mKIAA1433
9933	mouse, laboratory	10090	Cuedc1	103841	MGI:2144281	Chr11 cM	Chr11:-(+)	CUE domain containing 1	C330016O16Rik
2660	mouse, laboratory	10090	Cul4b	72584	MGI:1919834	ChrX cM	ChrX:-(-)	cullin 4B	2700050M05Rik
2597	mouse, laboratory	10090	Cul5	75717	MGI:1922967	Chr9 cM	Chr9:-(-)	cullin 5	4921514I20Rik|8430423K24Rik|C030032G03Rik|C330021I08Rik|VACM-1
13058	mouse, laboratory	10090	Dab2ip	69601	MGI:1916851	Chr2 cM	Chr2:-(+)	disabled 2 interacting protein	2310011D08Rik|AIP1|mKIAA1743
3234	mouse, laboratory	10090	Dag1	13138	MGI:101864	Chr9 cM	Chr9:-(-)	dystroglycan 1	alpha-dystroglycan|beta-dystroglycan|D9Wsu13e|DG|dystrophin associated glycoprotein 1
4468	mouse, laboratory	10090	Dagla	269060	MGI:2677061	Chr19 cM	Chr19:-(-)	diacylglycerol lipase, alpha	Nsddr
134440	mouse, laboratory	10090	Dazap1	70248	MGI:1917498	Chr10 cM	Chr10:-(+)	DAZ associated protein 1	2410042M16Rik|mPrrp
9428	mouse, laboratory	10090	Dbr1	83703	MGI:1931520	Chr9 cM	Chr9:-(+)	debranching RNA lariats 1
55930	mouse, laboratory	10090	Dcaf7	71833	MGI:1919083	Chr11 cM	Chr11:-(+)	DDB1 and CUL4 associated factor 7	1700012F10Rik|2610037L01Rik|Wdr68
12499	mouse, laboratory	10090	Dcbld2	73379	MGI:1920629	Chr16 cM	Chr16:-(+)	discoidin, CUB and LCCL domain containing 2	1700055P21Rik|CLCP1|Esdn
16155	mouse, laboratory	10090	Dcun1d3	233805	MGI:2679003	Chr7 cM	Chr7:-(-)	DCN1, defective in cullin neddylation 1, domain containing 3 (S. cerevisiae)	1700020A13Rik|MGC:40975
101101	mouse, laboratory	10090	Ddx17	67040	MGI:1914290	Chr15 cM	Chr15:-(-)	DEAD box helicase 17	2610007K22Rik|A430025E01Rik|DEAD (Asp-Glu-Ala-Asp) box polypeptide 17|LOC381024|p72
3542	mouse, laboratory	10090	Ddx23	74351	MGI:1921601	Chr15 cM	Chr15:-(-)	DEAD box helicase 23	3110082M05Rik|4921506D17Rik|DEAD (Asp-Glu-Ala-Asp) box polypeptide 23
49137	mouse, laboratory	10090	Ddx42	72047	MGI:1919297	Chr11 cM	Chr11:-(+)	DEAD box helicase 42	1810047H21Rik|B430002H05Rik|DEAD (Asp-Glu-Ala-Asp) box polypeptide 42|SF3b125
6092	mouse, laboratory	10090	Ddx47	67755	MGI:1915005	Chr6 cM	Chr6:-(+)	DEAD box helicase 47	4930588A18Rik|DEAD (Asp-Glu-Ala-Asp) box polypeptide 47
41308	mouse, laboratory	10090	Ddx49	234374	MGI:2136689	Chr8 cM	Chr8:-(-)	DEAD box helicase 49	DEAD (Asp-Glu-Ala-Asp) box polypeptide 49|R27090_2
12196	mouse, laboratory	10090	Ddx55	67848	MGI:1915098	Chr5 cM	Chr5:-(+)	DEAD box helicase 55	2810021H22Rik|DEAD (Asp-Glu-Ala-Asp) box polypeptide 55|mKIAA1595
3238	mouse, laboratory	10090	Ddx6	13209	MGI:104976	Chr9 cM	Chr9:-(+)	DEAD (Asp-Glu-Ala-Asp) box polypeptide 6	1110001P04Rik|C430015D01Rik|DEAD (Asp-Glu-Ala-Asp) box polypeptide 6|E230023J21Rik|HLR2|mRCK/P54|p54|rck
7980	mouse, laboratory	10090	Dedd	21945	MGI:1333874	Chr1 cM	Chr1:-(+)	death effector domain-containing	CASP8IP1|Dedpro1|DEFT|FLDED1|KE05
11103	mouse, laboratory	10090	Def6	23853	MGI:1346328	Chr17 cM	Chr17:-(+)	differentially expressed in FDCP 6	2410003F05Rik|6430538D02Rik|IBP|IRF-4-binding protein|SLAT
55770	mouse, laboratory	10090	Degs1	13244	MGI:1097711	Chr1 cM	Chr1:-(-)	delta(4)-desaturase, sphingolipid 1	Des1|Mdes
11739	mouse, laboratory	10090	Dennd1b	329260	MGI:2447812	Chr1 cM	Chr1:-(+)	DENN/MADD domain containing 1B	4632404N19Rik|4930467M19Rik|6820401H01Rik|F730008N07Rik
14584	mouse, laboratory	10090	Dennd5a	19347	MGI:1201681	Chr7 cM	Chr7:-(-)	DENN/MADD domain containing 5A	1500012B19Rik|mKIAA1091|ORF37|Rab6ip1
20994	mouse, laboratory	10090	Dhrs3	20148	MGI:1315215	Chr4 cM	Chr4:-(+)	dehydrogenase/reductase (SDR family) member 3	retSDR1|Rsdr1
34139	mouse, laboratory	10090	Dido1	23856	MGI:1344352	Chr2 cM	Chr2:-(-)	death inducer-obliterator 1	6720461J16Rik|C130092D22Rik|D130048F08Rik|Datf1|dido|DIO-1|mKIAA0333
4442	mouse, laboratory	10090	Dlc1	50768	MGI:1354949	Chr8 cM	Chr8:-(-)	deleted in liver cancer 1	A730069N07Rik|Arhgap7|p122-RhoGAP|STARD12
3486	mouse, laboratory	10090	Dlg5	71228	MGI:1918478	Chr14 cM	Chr14:-(-)	discs large MAGUK scaffold protein 5	4933429D20Rik|mKIAA0583
8935	mouse, laboratory	10090	Dlgap4	228836	MGI:2138865	Chr2 cM	Chr2:-(+)	DLG associated protein 4	DAP4|MGC:37636|mKIAA0964|PSD-95/SAP90 binding protein 4|SAP90/PSD-95-associated protein 4|Sapap4|WBP16
8017	mouse, laboratory	10090	Dmtf1	23857	MGI:1344415	Chr5 cM	Chr5:-(-)	cyclin D binding myb-like transcription factor 1	Dmp1
9749	mouse, laboratory	10090	Dnajb12	56709	MGI:1931881	Chr10 cM	Chr10:-(+)	DnaJ heat shock protein family (Hsp40) member B12	mDj10
32155	mouse, laboratory	10090	Dnajb9	27362	MGI:1351618	Chr12 cM	Chr12:-(-)	DnaJ heat shock protein family (Hsp40) member B9	ERdj4|Mdg1|mDj7|microvascular endothelial differentiation gene
7293	mouse, laboratory	10090	Dnajc1	13418	MGI:103268	Chr2 cM	Chr2:-(-)	DnaJ heat shock protein family (Hsp40) member C1	4733401K02Rik|D230036H06Rik|Dnajl1|ERdj1|MTJ1
10358	mouse, laboratory	10090	Dnajc10	66861	MGI:1914111	Chr2 cM	Chr2:-(+)	DnaJ heat shock protein family (Hsp40) member C10	1200006L06Rik|D2Ertd706e|ERdj5|JPDI
45414	mouse, laboratory	10090	Dnajc16	214063	MGI:2442146	Chr4 cM	Chr4:-(-)	DnaJ heat shock protein family (Hsp40) member C16	2900037O03Rik|4732437J24Rik|mKIAA0962
10663	mouse, laboratory	10090	Dolpp1	57170	MGI:1914093	Chr2 cM	Chr2:-(+)	dolichyl pyrophosphate phosphatase 1	0610011H20Rik|LSFR2
32779	mouse, laboratory	10090	Dot1l	208266	MGI:2143886	Chr10 cM	Chr10:-(+)	DOT1-like, histone H3 methyltransferase (S. cerevisiae)	KMT4|mDot1
1060	mouse, laboratory	10090	Dph2	67728	MGI:1914978	Chr4 cM	Chr4:-(-)	DPH2 homolog	9130020C19Rik|Dph2l2
57098	mouse, laboratory	10090	Dpp8	74388	MGI:1921638	Chr9 cM	Chr9:-(+)	dipeptidylpeptidase 8	2310004I03Rik|4932434F09Rik
5215	mouse, laboratory	10090	Dusp10	63953	MGI:1927070	Chr1 cM	Chr1:-(+)	dual specificity phosphatase 10	2610306G15Rik|MKP5|MKP-5
1065	mouse, laboratory	10090	Dusp4	319520	MGI:2442191	Chr8 cM	Chr8:-(+)	dual specificity phosphatase 4	2700078F24Rik|E130306H24Rik|MKP2
69237	mouse, laboratory	10090	Dym	69190	MGI:1918480	Chr18 cM	Chr18:-(+)	dymeclin	1810041M12Rik|4933427L07Rik|C030019K18Rik
55576	mouse, laboratory	10090	Dyrk1a	13548	MGI:1330299	Chr16 cM	Chr16:-(+)	dual-specificity tyrosine-(Y)-phosphorylation regulated kinase 1a	2310043O08Rik|D16Ertd272e|D16Ertd493e|Dyrk|Mnbh
48437	mouse, laboratory	10090	Dyrk2	69181	MGI:1330301	Chr10 cM	Chr10:-(-)	dual-specificity tyrosine-(Y)-phosphorylation regulated kinase 2	1810038L18Rik
3259	mouse, laboratory	10090	E4f1	13560	MGI:109530	Chr17 cM	Chr17:-(-)	E4F transcription factor 1
23106	mouse, laboratory	10090	Echdc1	52665	MGI:1277169	Chr10 cM	Chr10:-(+)	enoyl Coenzyme A hydratase domain containing 1	1700028A24Rik
11827	mouse, laboratory	10090	Edc3	353190	MGI:2142951	Chr9 cM	Chr9:-(+)	enhancer of mRNA decapping 3	Lsm16|Yjdc
11866	mouse, laboratory	10090	Edem3	66967	MGI:1914217	Chr1 cM	Chr1:-(+)	ER degradation enhancer, mannosidase alpha-like 3	2310050N11Rik
5952	mouse, laboratory	10090	Eef1akmt1	68043	MGI:1915293	Chr14 cM	Chr14:-(-)	EEF1A alpha lysine methyltransferase 1	2510005D08Rik|Ayu21-96|GtAyu21-96|Gt(Ayu21)96Imeg|N6amt2
66195	mouse, laboratory	10090	Efr3b	668212	MGI:2444851	Chr12 cM	Chr12:-(-)	EFR3 homolog B	C030014M07Rik|mKIAA0953
74545	mouse, laboratory	10090	Egfr	13649	MGI:95294	Chr11 cM	Chr11:-(+)	epidermal growth factor receptor	9030024J15Rik|avian erythroblastic leukemia viral (v-erb-b) oncogene homolog|Erbb|Errb1|Wa5
56936	mouse, laboratory	10090	Egln1	112405	MGI:1932286	Chr8 cM	Chr8:-(-)	egl-9 family hypoxia-inducible factor 1	Hif-p4h-2|ORF13|Phd2|SM-20
56394	mouse, laboratory	10090	Egr1	13653	MGI:95295	Chr18 cM	Chr18:-(+)	early growth response 1	A530045N19Rik|Egr-1|ETR103|Krox-1|Krox24|Krox-24|NGF1-A|NGFIA|NGFI-A|TIS8|Zenk|Zfp-6|Zif268
26430	mouse, laboratory	10090	Ehd4	98878	MGI:1919619	Chr2 cM	Chr2:-(-)	EH-domain containing 4	2210022F10Rik
11698	mouse, laboratory	10090	Ehmt1	77683	MGI:1924933	Chr2 cM	Chr2:-(-)	euchromatic histone methyltransferase 1	9230102N17Rik|KMT1D|mKIAA1876
22219	mouse, laboratory	10090	Eif1b	68969	MGI:1916219	Chr9 cM	Chr9:-(+)	eukaryotic translation initiation factor 1B	1500010M16Rik|3110001N14Rik
3557	mouse, laboratory	10090	Eif2ak3	13666	MGI:1341830	Chr6 cM	Chr6:-(+)	eukaryotic translation initiation factor 2 alpha kinase 3	PERK
1080	mouse, laboratory	10090	Eif2b1	209354	MGI:2384802	Chr5 cM	Chr5:-(-)	eukaryotic translation initiation factor 2B, subunit 1 (alpha)	26kDa|D5Ertd406e|EIF2B|EIF2BA|MGC:6458
10522	mouse, laboratory	10090	Eif4enif1	74203	MGI:1921453	Chr11 cM	Chr11:-(+)	eukaryotic translation initiation factor 4E nuclear import factor 1	2610509L04Rik|A930019J01Rik|Clast4|D11Ertd166e
134613	mouse, laboratory	10090	Eif5b	226982	MGI:2441772	Chr1 cM	Chr1:-(+)	eukaryotic translation initiation factor 5B	A030003E17Rik|IF2
7303	mouse, laboratory	10090	Elf1	13709	MGI:107180	Chr14 cM	Chr14:-(+)	E74-like factor 1	Elf-1
5006	mouse, laboratory	10090	Elf2	69257	MGI:1916507	Chr3 cM	Chr3:-(-)	E74-like factor 2	2610036A20Rik|A230104O07Rik|NERF-2
1492	mouse, laboratory	10090	Elk4	13714	MGI:102853	Chr1 cM	Chr1:-(+)	ELK4, member of ETS oncogene family	2310011G17Rik|A130026I01Rik|Sap1
4762	mouse, laboratory	10090	Ell	13716	MGI:109377	Chr8 cM	Chr8:-(+)	elongation factor RNA polymerase II	eleven-nineteen lysine-rich leukemia gene|Ell1|Men
56685	mouse, laboratory	10090	Elmo1	140580	MGI:2153044	Chr13 cM	Chr13:-(+)	engulfment and cell motility 1	6330578D22Rik|C230095H21Rik|CED-12
7105	mouse, laboratory	10090	Elp3	74195	MGI:1921445	Chr14 cM	Chr14:-(-)	elongator acetyltransferase complex subunit 3	2610507P14Rik|KAT9
16123	mouse, laboratory	10090	Eme1	268465	MGI:3576783	Chr11 cM	Chr11:-(-)	essential meiotic structure-specific endonuclease 1
56841	mouse, laboratory	10090	Eml4	78798	MGI:1926048	Chr17 cM	Chr17:-(+)	echinoderm microtubule associated protein like 4	4930443C24Rik
2694	mouse, laboratory	10090	Enc1	13803	MGI:109610	Chr13 cM	Chr13:-(+)	ectodermal-neural cortex 1	Nrpb|PIG10
3971	mouse, laboratory	10090	Eomes	13813	MGI:1201683	Chr9 cM	Chr9:-(+)	eomesodermin	Tbr2
8126	mouse, laboratory	10090	Epb41l1	13821	MGI:103010	Chr2 cM	Chr2:-(+)	erythrocyte membrane protein band 4.1 like 1	4.1N|Epb4.1l1|mKIAA0338
20933	mouse, laboratory	10090	Epha4	13838	MGI:98277	Chr1 cM	Chr1:-(-)	Eph receptor A4	2900005C20Rik|Cek8|Hek8|rb|Sek|Sek1|Tyro1
37925	mouse, laboratory	10090	Ephb2	13844	MGI:99611	Chr4 cM	Chr4:-(-)	Eph receptor B2	Cek5|Drt|Erk|eteck|Hek5|Nuk|Prkm5|Qek5|Sek3|Tyro5
20938	mouse, laboratory	10090	Ephb3	13845	MGI:104770	Chr16 cM	Chr16:-(+)	Eph receptor B3	Cek10|Etk2|HEK2|MDK5|Sek4|Tyro6
41282	mouse, laboratory	10090	Erbin	59079	MGI:1890169	Chr13 cM	Chr13:-(-)	Erbb2 interacting protein	1700028E05Rik|Erbb2ip|Erbin|mKIAA1225
3836	mouse, laboratory	10090	Ercc4	50505	MGI:1354163	Chr16 cM	Chr16:-(+)	excision repair cross-complementing rodent repair deficiency, complementation group 4	Xpf
133552	mouse, laboratory	10090	Ercc6	319955	MGI:1100494	Chr14 cM	Chr14:-(+)	excision repair cross-complementing rodent repair deficiency, complementation group 6	C130058G22Rik|CSB|CS group B correcting gene
6574	mouse, laboratory	10090	Ergic2	67456	MGI:1914706	Chr6 cM	Chr6:-(-)	ERGIC and golgi 2	1200009B18Rik|4930572C01Rik
4716	mouse, laboratory	10090	Erlin1	226144	MGI:2387613	Chr19 cM	Chr19:-(-)	ER lipid raft associated 1	2810439N09Rik|Keo4|Spfh1
10344	mouse, laboratory	10090	Errfi1	74155	MGI:1921405	Chr4 cM	Chr4:-(+)	ERBB receptor feedback inhibitor 1	1300002F13Rik|Mig-6|RALT
10477	mouse, laboratory	10090	Etl4	208618	MGI:95454	Chr2 cM	Chr2:-(+)	enhancer trap locus 4	6620402G01Rik|9430077C05Rik|E330027G05Rik|Etl-4|Sickle tail|Skt
3838	mouse, laboratory	10090	Ets2	23872	MGI:95456	Chr16 cM	Chr16:-(+)	E26 avian leukemia oncogene 2, 3' domain	Ets-2
21085	mouse, laboratory	10090	Etv3	27049	MGI:1350926	Chr3 cM	Chr3:-(+)	ets variant 3	ETS-domain transcriptional repressor|METS|Pe1
18151	mouse, laboratory	10090	Eva1b	230752	MGI:1922063	Chr4 cM	Chr4:-(+)	eva-1 homolog B (C. elegans)	2610027C15Rik|Fam176b
38195	mouse, laboratory	10090	Exoc5	105504	MGI:2145645	Chr14 cM	Chr14:-(-)	exocyst complex component 5	PRO1912|SEC10|Sec10l1
1103	mouse, laboratory	10090	Extl3	54616	MGI:1860765	Chr14 cM	Chr14:-(-)	exostosin-like glycosyltransferase 3	2900009G18Rik
21087	mouse, laboratory	10090	F2rl1	14063	MGI:101910	Chr13 cM	Chr13:-(-)	coagulation factor II (thrombin) receptor-like 1	Gpcr11|Par2|PAR-2|Protease-activated receptor-2|proteinase-activated receptor-2
17535	mouse, laboratory	10090	Faap24	101831	MGI:2142208	Chr7 cM	Chr7:-(-)	Fanconi anemia core complex associated protein 24	C230052I12Rik
10270	mouse, laboratory	10090	Fam114a2	67726	MGI:1917629	Chr11 cM	Chr11:-(-)	family with sequence similarity 114, member A2	1810073G14Rik|9030624B09Rik
32665	mouse, laboratory	10090	Fam135a	68187	MGI:1915437	Chr1 cM	Chr1:-(-)	family with sequence similarity 135, member A	4921533L14Rik
19521	mouse, laboratory	10090	Fam171a1	269233	MGI:2442917	Chr2 cM	Chr2:-(+)	family with sequence similarity 171, member A1	9630050M13Rik
8909	mouse, laboratory	10090	Fam20b	215015	MGI:2443990	Chr1 cM	Chr1:-(-)	FAM20B, glycosaminoglycan xylosylkinase	C530043G21Rik
34981	mouse, laboratory	10090	Fam210a	108654	MGI:1914000	Chr18 cM	Chr18:-(-)	family with sequence similarity 210, member A	4933403F05Rik
49697	mouse, laboratory	10090	Fam217b	71532	MGI:1918782	Chr2 cM	Chr2:-(+)	family with sequence similarity 217, member B	9030418K01Rik
18660	mouse, laboratory	10090	Fam53a	74504	MGI:1919225	Chr5 cM	Chr5:-(-)	family with sequence similarity 53, member A	2410018C17Rik|5430419M09Rik|DNTNP
18451	mouse, laboratory	10090	Fam78b	226610	MGI:2443050	Chr1 cM	Chr1:-(+)	family with sequence similarity 78, member B	C030014K22Rik|C030020L09Rik
32301	mouse, laboratory	10090	Fam8a1	97863	MGI:2145496	Chr13 cM	Chr13:-(+)	family with sequence similarity 8, member A1	C78339
55800	mouse, laboratory	10090	Fasn	14104	MGI:95485	Chr11 cM	Chr11:-(-)	fatty acid synthase	A630082H08Rik|FAS
44220	mouse, laboratory	10090	Fbxl15	68431	MGI:1915681	Chr19 cM	Chr19:-(+)	F-box and leucine-rich repeat protein 15	0710008C12Rik|Fbxo37
12433	mouse, laboratory	10090	Fbxo22	71999	MGI:1926014	Chr9 cM	Chr9:-(+)	F-box protein 22	0610033L19Rik|1600016C16Rik
9050	mouse, laboratory	10090	Fbxo28	67948	MGI:1261890	Chr1 cM	Chr1:-(-)	F-box protein 28	4833428J17Rik|5730505P19Rik|D1Ertd578e|Fbx28|mKIAA0483
16234	mouse, laboratory	10090	Fbxo42	213499	MGI:1924992	Chr4 cM	Chr4:-(+)	F-box protein 42	6720460I06Rik
14713	mouse, laboratory	10090	Fbxo45	268882	MGI:2447775	Chr16 cM	Chr16:-(-)	F-box protein 45	2610017J04Rik|MGC:19444
8131	mouse, laboratory	10090	Fbxw2	30050	MGI:1353435	Chr2 cM	Chr2:-(-)	F-box and WD-40 domain protein 2	FBW2|Fwd2|MD6
8496	mouse, laboratory	10090	Fbxw5	30839	MGI:1354731	Chr2 cM	Chr2:-(+)	F-box and WD-40 domain protein 5	Fbw5
117451	mouse, laboratory	10090	Fbxw7	50754	MGI:1354695	Chr3 cM	Chr3:-(+)	F-box and WD-40 domain protein 7	1110001A17Rik|AGO|Cdc4|Fbw7|Fbxo30|Fbxw6|SEL-10
7713	mouse, laboratory	10090	Fem1a	14154	MGI:1335089	Chr17 cM	Chr17:-(+)	fem 1 homolog a	Eprap
7714	mouse, laboratory	10090	Fem1b	14155	MGI:1335087	Chr9 cM	Chr9:-(-)	fem 1 homolog b	mKIAA0396
3034	mouse, laboratory	10090	Fen1	14156	MGI:102779	Chr19 cM	Chr19:-(-)	flap structure specific endonuclease 1
3284	mouse, laboratory	10090	Fgf10	14165	MGI:1099809	Chr13 cM	Chr13:-(+)	fibroblast growth factor 10	AEY17|FGF-10|Gsfaey17
3841	mouse, laboratory	10090	Fgf3	14174	MGI:95517	Chr7 cM	Chr7:-(+)	fibroblast growth factor 3	Fgf-3|Int-2|Int-P
55437	mouse, laboratory	10090	Fgfr3	14184	MGI:95524	Chr5 cM	Chr5:-(+)	fibroblast growth factor receptor 3	Fgfr-3|HBGFR|sam3
5139	mouse, laboratory	10090	Ficd	231630	MGI:1098550	Chr5 cM	Chr5:-(+)	FIC domain containing	D5Ertd40e
7720	mouse, laboratory	10090	Fkbp8	14232	MGI:1341070	Chr8 cM	Chr8:-(+)	FK506 binding protein 8	38kDa|Fkbp38
8291	mouse, laboratory	10090	Flrt2	399558	MGI:3603594	Chr12 cM	Chr12:-(+)	fibronectin leucine rich transmembrane protein 2
7762	mouse, laboratory	10090	Foxa2	15376	MGI:1347476	Chr2 cM	Chr2:-(-)	forkhead box A2	Hnf3b|Hnf-3b|HNF3beta|HNF3-beta|Tcf3b|Tcf-3b
1117	mouse, laboratory	10090	Foxj1	15223	MGI:1347474	Chr11 cM	Chr11:-(-)	forkhead box J1	FKHL-13|Hfh4|HFH-4
7318	mouse, laboratory	10090	Foxm1	14235	MGI:1347487	Chr6 cM	Chr6:-(+)	forkhead box M1	Fkh16|Foxm1b|HFH-11B|Mpm2|Trident|WIN
1527	mouse, laboratory	10090	Foxo1	56458	MGI:1890077	Chr3 cM	Chr3:-(+)	forkhead box O1	Afxh|FKHR|Fkhr1|Foxo1a
31039	mouse, laboratory	10090	Foxo3	56484	MGI:1890081	Chr10 cM	Chr10:-(-)	forkhead box O3	1110048B16Rik|2010203A17Rik|Fkhr2|FKHRL1|Foxo3a
11800	mouse, laboratory	10090	Foxred2	239554	MGI:106315	Chr15 cM	Chr15:-(-)	FAD-dependent oxidoreductase domain containing 2	A430097D04Rik|D15Bwg0759e|LOC239554
4846	mouse, laboratory	10090	Frs2	327826	MGI:1100860	Chr10 cM	Chr10:-(-)	fibroblast growth factor receptor substrate 2	C330018A15Rik|Frs2alpha|SNT1
41738	mouse, laboratory	10090	Fundc1	72018	MGI:1919268	ChrX cM	ChrX:-(-)	FUN14 domain containing 1	1500005J14Rik|1810033P05Rik
4800	mouse, laboratory	10090	Fut9	14348	MGI:1330859	Chr4 cM	Chr4:-(-)	fucosyltransferase 9	mFuc-TIX|mFUT9
48068	mouse, laboratory	10090	Fyn	14360	MGI:95602	Chr10 cM	Chr10:-(+)	Fyn proto-oncogene	Src Kinase p59
20750	mouse, laboratory	10090	Fzd1	14362	MGI:1196625	Chr5 cM	Chr5:-(-)	frizzled class receptor 1	Fz1|FZ-1
20751	mouse, laboratory	10090	Fzd7	14369	MGI:108570	Chr1 cM	Chr1:-(+)	frizzled class receptor 7	Fz7
38096	mouse, laboratory	10090	G3bp1	27041	MGI:1351465	Chr11 cM	Chr11:-(+)	GTPase activating protein (SH3 domain) binding protein 1	GAP SH3 binding protein
137244	mouse, laboratory	10090	G3bp2	23881	MGI:2442040	Chr5 cM	Chr5:-(-)	GTPase activating protein (SH3 domain) binding protein 2	E430034L04Rik|G3BP|G3BP2
1542	mouse, laboratory	10090	Gab1	14388	MGI:108088	Chr8 cM	Chr8:-(-)	growth factor receptor bound protein 2-associated protein 1
7723	mouse, laboratory	10090	Gabpb1	14391	MGI:95611	Chr2 cM	Chr2:-(-)	GA repeat binding protein, beta 1	BABPB2|E4TF1|E4TF1-47|E4TF1-53|E4Tf1B|GABPB1-1|GABPB1-2|NRF2B1|NRF2B2
3297	mouse, laboratory	10090	Galnt2	108148	MGI:894694	Chr8 cM	Chr8:-(+)	polypeptide N-acetylgalactosaminyltransferase 2	ppGaNTase-T2
1551	mouse, laboratory	10090	Gata4	14463	MGI:95664	Chr14 cM	Chr14:-(-)	GATA binding protein 4	Gata-4
9766	mouse, laboratory	10090	Gatad2a	234366	MGI:2384585	Chr8 cM	Chr8:-(-)	GATA zinc finger domain containing 2A	1110066C11Rik|MGC:29315|MGC:36975
9155	mouse, laboratory	10090	Gemin5	216766	MGI:2449311	Chr11 cM	Chr11:-(-)	gem nuclear organelle associated protein 5
15522	mouse, laboratory	10090	Ggact	223267	MGI:2385008	Chr14 cM	Chr14:-(-)	gamma-glutamylamine cyclotransferase	A2ld1|MGC:7867
44516	mouse, laboratory	10090	Gins1	69270	MGI:1916520	Chr2 cM	Chr2:-(+)	GINS complex subunit 1 (Psf1 homolog)	2810418N01Rik|Psf1
41496	mouse, laboratory	10090	Gins3	78833	MGI:1926083	Chr8 cM	Chr8:-(+)	GINS complex subunit 3 (Psf3 homolog)	2700085M18Rik
136	mouse, laboratory	10090	Gja1	14609	MGI:95713	Chr10 cM	Chr10:-(+)	gap junction protein, alpha 1	alpha 1 connexin|Cnx43|connexin43|connexin 43|Cx43|Cx43alpha1|Gja-1
15773	mouse, laboratory	10090	Glcci1	170772	MGI:2179717	Chr6 cM	Chr6:-(+)	glucocorticoid induced transcript 1	2310047L21Rik|A130036A18Rik|Fam117c|GIG18|Tssn1
7533	mouse, laboratory	10090	Glg1	20340	MGI:104967	Chr8 cM	Chr8:-(-)	golgi apparatus protein 1	CFR|CFR-1|ESL-1|MG160|MG-160|Selel
12725	mouse, laboratory	10090	Gli2	14633	MGI:95728	Chr1 cM	Chr1:-(-)	GLI-Kruppel family member GLI2
32720	mouse, laboratory	10090	Glt8d1	76485	MGI:1923735	Chr14 cM	Chr14:-(+)	glycosyltransferase 8 domain containing 1	2410004H05Rik|5430414N14Rik
37567	mouse, laboratory	10090	Glul	14645	MGI:95739	Chr1 cM	Chr1:-(+)	glutamate-ammonia ligase (glutamine synthetase)	Glns|GS
14738	mouse, laboratory	10090	Glyctk	235582	MGI:2444085	Chr9 cM	Chr9:-(-)	glycerate kinase	6230410P16Rik
12525	mouse, laboratory	10090	Glyr1	74022	MGI:1921272	Chr16 cM	Chr16:-(-)	glyoxylate reductase 1 homolog (Arabidopsis)	2810419J22Rik|3930401K13Rik|NDF|Npac
10647	mouse, laboratory	10090	Gmeb1	56809	MGI:2135604	Chr4 cM	Chr4:-(-)	glucocorticoid modulatory element binding protein 1	1110050A04Rik
8228	mouse, laboratory	10090	Gmeb2	229004	MGI:2652836	Chr2 cM	Chr2:-(-)	glucocorticoid modulatory element binding protein 2
55976	mouse, laboratory	10090	Gna13	14674	MGI:95768	Chr11 cM	Chr11:-(+)	guanine nucleotide binding protein, alpha 13	Galpha13
22574	mouse, laboratory	10090	Gnaz	14687	MGI:95780	Chr10 cM	Chr10:-(+)	guanine nucleotide binding protein, alpha z subunit	Gz
41515	mouse, laboratory	10090	Gnb1l	13972	MGI:1338057	Chr16 cM	Chr16:-(+)	guanine nucleotide binding protein (G protein), beta polypeptide 1-like	ESTM55|Me49f07|Wdr14|Wdvcf
41102	mouse, laboratory	10090	Golt1b	66964	MGI:1914214	Chr6 cM	Chr6:-(+)	golgi transport 1B	2310061A22Rik
45113	mouse, laboratory	10090	Gorab	98376	MGI:2138271	Chr1 cM	Chr1:-(-)	golgin, RAB6-interacting	NTKL-BP1|Scyl1bp1
49916	mouse, laboratory	10090	Gorasp1	74498	MGI:1921748	Chr9 cM	Chr9:-(-)	golgi reassembly stacking protein 1	5430411C10Rik|GOLPH5|GRASP65|P65
9976	mouse, laboratory	10090	Gpatch2	67769	MGI:1915019	Chr1 cM	Chr1:-(+)	G patch domain containing 2	5830433G22Rik|5830436K05Rik|Gpatc2
20477	mouse, laboratory	10090	Gpc1	14733	MGI:1194891	Chr1 cM	Chr1:-(+)	glypican 1
5257	mouse, laboratory	10090	Gpn1	74254	MGI:1921504	Chr5 cM	Chr5:-(+)	GPN-loop GTPase 1	2410004J02Rik|Xab1
81077	mouse, laboratory	10090	Gpr107	277463	MGI:2139054	Chr2 cM	Chr2:-(+)	G protein-coupled receptor 107	mKIAA1624
9435	mouse, laboratory	10090	Gprc5b	64297	MGI:1927596	Chr7 cM	Chr7:-(-)	G protein-coupled receptor, family C, group 5, member B	hypothetical protein, clone 2-63
56584	mouse, laboratory	10090	Gpsm2	76123	MGI:1923373	Chr3 cM	Chr3:-(-)	G-protein signalling modulator 2 (AGS3-like, C. elegans)	6230410J09Rik|LGN|Pins
3882	mouse, laboratory	10090	Grb10	14783	MGI:103232	Chr11 cM	Chr11:-(-)	growth factor receptor bound protein 10	5730571D09Rik|maternally expressed gene 1|Meg1|mKIAA0207
8022	mouse, laboratory	10090	Grem1	23892	MGI:1344337	Chr2 cM	Chr2:-(-)	gremlin 1, DAN family BMP antagonist	Cktsf1b1|Drm|Grem|gremlin
21072	mouse, laboratory	10090	Grk3	320129	MGI:87941	Chr5 cM	Chr5:-(-)	G protein-coupled receptor kinase 3	4833444A01Rik|Adrbk2|Adrbk-2|Bark-2|beta ARK2
37570	mouse, laboratory	10090	Grk6	26385	MGI:1347078	Chr13 cM	Chr13:-(+)	G protein-coupled receptor kinase 6	Gprk6
38062	mouse, laboratory	10090	Gtf2e1	74197	MGI:1921447	Chr16 cM	Chr16:-(-)	general transcription factor II E, polypeptide 1 (alpha subunit)	2610024P03Rik|56kDa|FE|TFIIE-A
8147	mouse, laboratory	10090	Gtf3c4	269252	MGI:2138937	Chr2 cM	Chr2:-(-)	general transcription factor IIIC, polypeptide 4	KAT12
37271	mouse, laboratory	10090	Gusb	110006	MGI:95872	Chr5 cM	Chr5:-(-)	glucuronidase, beta	adipose storage deficiency|asd|g|Gur|Gus|Gus-r|Gus-s|Gus-t|Gus-u|Gut
55946	mouse, laboratory	10090	Hdac4	208727	MGI:3036234	Chr1 cM	Chr1:-(-)	histone deacetylase 4	4932408F19Rik
11116	mouse, laboratory	10090	Heatr6	217026	MGI:1919790	Chr11 cM	Chr11:-(+)	HEAT repeat containing 6	2700008B19Rik
7756	mouse, laboratory	10090	Hey1	15213	MGI:1341800	Chr3 cM	Chr3:-(-)	hairy/enhancer-of-split related with YRPW motif 1	bHLHb31|CHF2|Herp2|hesr-1|Hesr1|HRT1
4740	mouse, laboratory	10090	Hic1	15248	MGI:1338010	Chr11 cM	Chr11:-(-)	hypermethylated in cancer 1	HIC-1
9020	mouse, laboratory	10090	Hic2	58180	MGI:1929869	Chr16 cM	Chr16:-(+)	hypermethylated in cancer 2	HRG22|mKIAA1020
9174	mouse, laboratory	10090	Hinfp	102423	MGI:2429620	Chr9 cM	Chr9:-(-)	histone H4 transcription factor	DKFZp434F162|Mizf
68463	mouse, laboratory	10090	Hip1	215114	MGI:1099804	Chr5 cM	Chr5:-(-)	huntingtin interacting protein 1	2610109B09Rik|A930014B11Rik|E130315I21Rik|HIP-1|MGC:27616
100530	mouse, laboratory	10090	Hk1	15275	MGI:96103	Chr10 cM	Chr10:-(-)	hexokinase 1	Hk-1|Hk1-s|mHk1-s
32399	mouse, laboratory	10090	Hmg20a	66867	MGI:1914117	Chr9 cM	Chr9:-(+)	high mobility group 20A	1200004E06Rik|5730490E10Rik|Hmgxb1
44229	mouse, laboratory	10090	Hmgxb3	106894	MGI:2441817	Chr18 cM	Chr18:-(-)	HMG box domain containing 3	2510002C16Rik|A630042L21Rik|mKIAA0194
22991	mouse, laboratory	10090	Hnrnpu	51810	MGI:1858195	Chr1 cM	Chr1:-(-)	heterogeneous nuclear ribonucleoprotein U	Hnrpu|scaffold attachment factor A|Sp120
11691	mouse, laboratory	10090	Hps6	20170	MGI:2181763	Chr19 cM	Chr19:-(+)	HPS6, biogenesis of lysosomal organelles complex 2 subunit 3	5330434M19Rik|BLOC-2|Hermansky-Pudlak syndrome 6|ru|ruby eye
8025	mouse, laboratory	10090	Hs2st1	23908	MGI:1346049	Chr3 cM	Chr3:-(-)	heparan sulfate 2-O-sulfotransferase 1	Hs2st|mKIAA0448
75051	mouse, laboratory	10090	Hs6st1	50785	MGI:1354958	Chr1 cM	Chr1:-(+)	heparan sulfate 6-O-sulfotransferase 1	6OST1
5062	mouse, laboratory	10090	Hspa13	110920	MGI:1309463	Chr16 cM	Chr16:-(-)	heat shock protein 70 family, member 13	1600002I10Rik|60kDa|B230217N24Rik|Stch
21322	mouse, laboratory	10090	Hsph1	15505	MGI:105053	Chr5 cM	Chr5:-(-)	heat shock 105kDa/110kDa protein 1	Hsp105|HSP110|hsp110/105|hsp-E7I
8742	mouse, laboratory	10090	Hunk	26559	MGI:1347352	Chr16 cM	Chr16:-(+)	hormonally upregulated Neu-associated kinase	Bstk1|Mak-v
1632	mouse, laboratory	10090	Id2	15902	MGI:96397	Chr12 cM	Chr12:-(-)	inhibitor of DNA binding 2	bHLHb26|C78922|Idb2|inhibitor of differentiation 2
7778	mouse, laboratory	10090	Ier5	15939	MGI:1337072	Chr1 cM	Chr1:-(-)	immediate early response 5
524	mouse, laboratory	10090	Ifnar1	15975	MGI:107658	Chr16 cM	Chr16:-(+)	interferon (alpha and beta) receptor 1	Ifar|IFN-alpha/betaR|Ifrc
359	mouse, laboratory	10090	Ifngr1	15979	MGI:107655	Chr10 cM	Chr10:-(+)	interferon gamma receptor 1	CD119|Ifgr|IFN-gammaR|IFN-gamma R|Ifngr|Nktar
30997	mouse, laboratory	10090	Igf1r	16001	MGI:96433	Chr7 cM	Chr7:-(+)	insulin-like growth factor I receptor	A330103N21Rik|CD221|hyft|IGF-1R|line 186
676	mouse, laboratory	10090	Igf2r	16004	MGI:96435	Chr17 cM	Chr17:-(-)	insulin-like growth factor 2 receptor	CD222|CI-MPR|IGF-II/CI-MPR|M6P/IGF2R|mannose-6-phosphate receptor, cation independent|Mpr300
1182	mouse, laboratory	10090	Igsf3	78908	MGI:1926158	Chr3 cM	Chr3:-(+)	immunoglobulin superfamily, member 3	1700016K10Rik|2810035F16Rik|4833439O17Rik|mKIAA0466
12138	mouse, laboratory	10090	Ikbip	67454	MGI:1914704	Chr10 cM	Chr10:-(+)	IKBKB interacting protein	1200009F10Rik|1700023M03Rik
1645	mouse, laboratory	10090	Il6st	16195	MGI:96560	Chr13 cM	Chr13:-(+)	interleukin 6 signal transducer	5133400A03Rik|CD130|D13Ertd699e|gp130
38234	mouse, laboratory	10090	Immt	76614	MGI:1923864	Chr6 cM	Chr6:-(+)	inner membrane protein, mitochondrial	1700082C19Rik|D830041H16Rik|HMP|Micos60|mitofilin|P87|P87/89|P89
20388	mouse, laboratory	10090	Ing2	69260	MGI:1916510	Chr8 cM	Chr8:-(-)	inhibitor of growth family, member 2	2810011M06Rik|Ing1l|ING2|P33ING2
6804	mouse, laboratory	10090	Ing3	71777	MGI:1919027	Chr6 cM	Chr6:-(+)	inhibitor of growth family, member 3	1300013A07Rik|P47ING3
4046	mouse, laboratory	10090	Inpp5d	16331	MGI:107357	Chr1 cM	Chr1:-(+)	inositol polyphosphate-5-phosphatase D	SHIP|SHIP1|SHIP-1|Src homology 2 domain-containing inositol-5-phosphatase|s-SHIP
56602	mouse, laboratory	10090	Ip6k1	27399	MGI:1351633	Chr9 cM	Chr9:-(+)	inositol hexaphosphate kinase 1	1200016D08Rik|Ihpk1|InsP6|InsP6k1
56929	mouse, laboratory	10090	Ip6k2	76500	MGI:1923750	Chr9 cM	Chr9:-(+)	inositol hexaphosphate kinase 2	1500005N04Rik|Ihpk2
76214	mouse, laboratory	10090	Ipmk	69718	MGI:1916968	Chr10 cM	Chr10:-(+)	inositol polyphosphate multikinase	2410017C19Rik
5874	mouse, laboratory	10090	Ipo9	226432	MGI:1918944	Chr1 cM	Chr1:-(-)	importin 9	0710008K06Rik|Imp9
1207	mouse, laboratory	10090	Irak2	108960	MGI:2429603	Chr6 cM	Chr6:-(+)	interleukin-1 receptor-associated kinase 2	6330415L08Rik|IRAK-2|Irak2a|Irak2b|Irak2c|Irak2d
11280	mouse, laboratory	10090	Ireb2	64602	MGI:1928268	Chr9 cM	Chr9:-(+)	iron responsive element binding protein 2	D9Ertd85e|Irp2
87862	mouse, laboratory	10090	Isca1	69046	MGI:1916296	Chr13 cM	Chr13:-(-)	iron-sulfur cluster assembly 1	1810010A06Rik|Hbld2
10833	mouse, laboratory	10090	Islr2	320563	MGI:2444277	Chr9 cM	Chr9:-(-)	immunoglobulin superfamily containing leucine-rich repeat 2	B930052A04Rik|Linx|mbu-3|mKIAA1465
10211	mouse, laboratory	10090	Itfg2	101142	MGI:1915450	Chr6 cM	Chr6:-(-)	integrin alpha FG-GAP repeat containing 2	2700050P07Rik
1671	mouse, laboratory	10090	Itpka	228550	MGI:1333822	Chr2 cM	Chr2:-(+)	inositol 1,4,5-trisphosphate 3-kinase A	IP3-kinase A|MGC:28924
18162	mouse, laboratory	10090	Jade1	269424	MGI:1925835	Chr3 cM	Chr3:-(+)	jade family PHD finger 1	D530048A03Rik|mKIAA1807|Phf17
40981	mouse, laboratory	10090	Jade3	382207	MGI:2148019	ChrX cM	ChrX:-(+)	jade family PHD finger 3	mKIAA0215|Phf16
1677	mouse, laboratory	10090	Jag2	16450	MGI:1098270	Chr12 cM	Chr12:-(-)	jagged 2	D12Ggc2e|Serh
11338	mouse, laboratory	10090	Jam3	83964	MGI:1933825	Chr9 cM	Chr9:-(-)	junction adhesion molecule 3	1110002N23Rik|JAM-3|JAM-C|Jcam3
11306	mouse, laboratory	10090	Jmjd4	194952	MGI:2144404	Chr11 cM	Chr11:-(+)	jumonji domain containing 4
9046	mouse, laboratory	10090	Jmjd6	107817	MGI:1858910	Chr11 cM	Chr11:-(-)	jumonji domain containing 6	5730436I23Rik|mKIAA0585|PSR|PtdSerR|Ptdsr
10955	mouse, laboratory	10090	Jmy	57748	MGI:1913096	Chr13 cM	Chr13:-(-)	junction-mediating and regulatory protein
9140	mouse, laboratory	10090	Kansl1	76719	MGI:1923969	Chr11 cM	Chr11:-(-)	KAT8 regulatory NSL complex subunit 1	1700081L11Rik|mKIAA1267
11495	mouse, laboratory	10090	Katnbl1	72425	MGI:1919675	Chr2 cM	Chr2:-(+)	katanin p80 subunit B like 1	2410042D21Rik
13043	mouse, laboratory	10090	Kbtbd8	243574	MGI:2661430	Chr6 cM	Chr6:-(+)	kelch repeat and BTB (POZ) domain containing 8	mKIAA1842|SSEC51|SSEC 51|SSEC-51|Takrp
20515	mouse, laboratory	10090	Kcng1	241794	MGI:3616086	Chr2 cM	Chr2:-(-)	potassium voltage-gated channel, subfamily G, member 1	OTTMUSG00000016048
2773	mouse, laboratory	10090	Kcnk5	16529	MGI:1336175	Chr14 cM	Chr14:-(-)	potassium channel, subfamily K, member 5	TASK-2
11450	mouse, laboratory	10090	Kctd15	233107	MGI:2385276	Chr7 cM	Chr7:-(-)	potassium channel tetramerisation domain containing 15	MGC25497
12063	mouse, laboratory	10090	Kctd20	66989	MGI:1914239	Chr17 cM	Chr17:-(+)	potassium channel tetramerisation domain containing 20	2410004N11Rik|D17Ertd562e
12392	mouse, laboratory	10090	Kctd6	71393	MGI:1918643	Chr14 cM	Chr14:-(+)	potassium channel tetramerisation domain containing 6	5430433B02Rik
56564	mouse, laboratory	10090	Kdm2a	225876	MGI:1354736	Chr19 cM	Chr19:-(-)	lysine (K)-specific demethylase 2A	5530401A10Rik|Cxxc8|Fbl7|Fbxl11|Gm4560|Jhdm1a|lalina
13069	mouse, laboratory	10090	Kdm2b	30841	MGI:1354737	Chr5 cM	Chr5:-(-)	lysine (K)-specific demethylase 2B	Cxxc2|Fbxl10|Jhdm1b|mKIAA3014
27773	mouse, laboratory	10090	Kdm4b	193796	MGI:2442355	Chr17 cM	Chr17:-(+)	lysine (K)-specific demethylase 4B	4732474L06Rik|Jmjd2b|MGC:6349|mKIAA0876
3419	mouse, laboratory	10090	Kdm5a	214899	MGI:2136980	Chr6 cM	Chr6:-(+)	lysine (K)-specific demethylase 5A	Jarid1a|MGC:11659|Rbbp2|RBP2
22589	mouse, laboratory	10090	Kif13a	16553	MGI:1098264	Chr13 cM	Chr13:-(-)	kinesin family member 13A	4930505I07Rik|N-3 kinesin
99835	mouse, laboratory	10090	Kif1b	16561	MGI:108426	Chr4 cM	Chr4:-(-)	kinesin family member 1B	A530096N05Rik|D4Mil1e|Kif1b alpha|Kif1b beta|KIF1Bp130|KIF1Bp204|mKIAA0591|N-3 kinesin
56868	mouse, laboratory	10090	Kif21b	16565	MGI:109234	Chr1 cM	Chr1:-(+)	kinesin family member 21B	2610511N21Rik|mKIAA0449|N-5 kinesin
4135	mouse, laboratory	10090	Klf10	21847	MGI:1101353	Chr15 cM	Chr15:-(-)	Kruppel-like factor 10	Egral|Gdnfif|mGIF|Tieg1
15267	mouse, laboratory	10090	Klhdc10	76788	MGI:1924038	Chr6 cM	Chr6:-(+)	kelch domain containing 10	2410127E18Rik
23317	mouse, laboratory	10090	Klhl12	240756	MGI:2385619	Chr1 cM	Chr1:-(+)	kelch-like 12	C3ip1|MGC:7076
14805	mouse, laboratory	10090	Klhl18	270201	MGI:2143315	Chr9 cM	Chr9:-(-)	kelch-like 18	MGC:36415
21416	mouse, laboratory	10090	Klhl2	77113	MGI:1924363	Chr8 cM	Chr8:-(-)	kelch-like 2, Mayven	6030411N21Rik|8530402H02Rik|ABP-KELCH|Mav
45842	mouse, laboratory	10090	Klhl42	232539	MGI:2444786	Chr6 cM	Chr6:-(+)	kelch-like 42	C230080I20Rik|Klhdc5|mKIAA1340
18822	mouse, laboratory	10090	Kmt2e	69188	MGI:1924825	Chr5 cM	Chr5:-(+)	lysine (K)-specific methyltransferase 2E	1810033J14Rik|9530077A04Rik|D230038D11Rik|Mll5
32351	mouse, laboratory	10090	Kmt5b	225888	MGI:2444557	Chr19 cM	Chr19:-(+)	lysine methyltransferase 5B	C630029K18Rik|Suv420h1|Suv4-20h1
20520	mouse, laboratory	10090	Kpna3	16648	MGI:1100863	Chr14 cM	Chr14:-(-)	karyopherin (importin) alpha 3	importin alpha 4|importin alpha 4|IPOA4
22472	mouse, laboratory	10090	Kpna6	16650	MGI:1100836	Chr4 cM	Chr4:-(-)	karyopherin (importin) alpha 6	importin alpha 7|IPOA7|NPI-2
11447	mouse, laboratory	10090	Kxd1	75620	MGI:1922870	Chr8 cM	Chr8:-(-)	KxDL motif containing 1	0610030B01Rik|2810422J05Rik
12755	mouse, laboratory	10090	Lactb	80907	MGI:1933395	Chr9 cM	Chr9:-(-)	lactamase, beta	Mrpl56
1724	mouse, laboratory	10090	Lamc1	226519	MGI:99914	Chr1 cM	Chr1:-(-)	laminin, gamma 1	Lamb2|laminin B2
7810	mouse, laboratory	10090	Large1	16795	MGI:1342270	Chr8 cM	Chr8:-(-)	LARGE xylosyl- and glucuronyltransferase 1	BPFD#36|enr|fg|froggy|mKIAA0609
9089	mouse, laboratory	10090	Larp1	73158	MGI:1890165	Chr11 cM	Chr11:-(+)	La ribonucleoprotein domain family, member 1	1810024J12Rik|3110040D16Rik|Larp|mKIAA0731
18195	mouse, laboratory	10090	Larp4b	217980	MGI:106330	Chr13 cM	Chr13:-(+)	La ribonucleoprotein domain family, member 4B	D13Wsu64e|Larp5
32718	mouse, laboratory	10090	Lca5	75782	MGI:1923032	Chr9 cM	Chr9:-(-)	Leber congenital amaurosis 5 (human)	4930431B11Rik|5730406O13Rik|ORF64
18377	mouse, laboratory	10090	Ldlrad3	241576	MGI:2138856	Chr2 cM	Chr2:-(-)	low density lipoprotein receptor class A domain containing 3	Lrad3
17136	mouse, laboratory	10090	Lemd2	224640	MGI:2385045	Chr17 cM	Chr17:-(-)	LEM domain containing 2	Lem2|MGC:37253|NET25
8633	mouse, laboratory	10090	Lemd3	380664	MGI:3580376	Chr10 cM	Chr10:-(-)	LEM domain containing 3	Man1
8581	mouse, laboratory	10090	Lgalsl	216551	MGI:1916114	Chr11 cM	Chr11:-(-)	lectin, galactoside binding-like	1110067D22Rik
4222	mouse, laboratory	10090	Lhfpl2	218454	MGI:2145236	Chr13 cM	Chr13:-(+)	lipoma HMGIC fusion partner-like 2	mKIAA0206|vgim
1735	mouse, laboratory	10090	Lifr	16880	MGI:96788	Chr15 cM	Chr15:-(+)	LIF receptor alpha	A230075M04Rik|soluble differentiation-stimulating factor receptor
18212	mouse, laboratory	10090	Lin54	231506	MGI:2140902	Chr5 cM	Chr5:-(-)	lin-54 homolog (C. elegans)
10034	mouse, laboratory	10090	Lins1	72635	MGI:1919885	Chr7 cM	Chr7:-(+)	lines homolog 1	2700083B01Rik|Lins|Wins2
1742	mouse, laboratory	10090	Loxl2	94352	MGI:2137913	Chr14 cM	Chr14:-(+)	lysyl oxidase-like 2	1110004B06Rik|9430067E15Rik
1072	mouse, laboratory	10090	Lpar1	14745	MGI:108429	Chr4 cM	Chr4:-(-)	lysophosphatidic acid receptor 1	Edg2|Gpcr26|Kdt2|LPA1|vzg-1
8882	mouse, laboratory	10090	Lrig2	269473	MGI:2443718	Chr3 cM	Chr3:-(-)	leucine-rich repeats and immunoglobulin-like domains 2	4632419I10Rik
62452	mouse, laboratory	10090	Lrig3	320398	MGI:2443955	Chr10 cM	Chr10:-(+)	leucine-rich repeats and immunoglobulin-like domains 3	9030421L11Rik|9130004I02Rik|9430095K15Rik|mKIAA3016
17964	mouse, laboratory	10090	Lrp4	228357	MGI:2442252	Chr2 cM	Chr2:-(+)	low density lipoprotein receptor-related protein 4	6430526J12Rik|mdig|Megf7
1747	mouse, laboratory	10090	Lrp6	16974	MGI:1298218	Chr6 cM	Chr6:-(-)	low density lipoprotein receptor-related protein 6	Cd|Gw|ska26|ska<m26Jus>|skax26
44445	mouse, laboratory	10090	Lrrc1	214345	MGI:2442313	Chr9 cM	Chr9:-(-)	leucine rich repeat containing 1	A430093J20Rik
4645	mouse, laboratory	10090	Lrrc41	230654	MGI:2441984	Chr4 cM	Chr4:-(+)	leucine rich repeat containing 41	D630045E04Rik|D730026A16Rik|MUF1
12685	mouse, laboratory	10090	Lrrc42	77809	MGI:1925059	Chr4 cM	Chr4:-(-)	leucine rich repeat containing 42	A930011F22Rik
9103	mouse, laboratory	10090	Lrrc8b	433926	MGI:2141353	Chr5 cM	Chr5:-(+)	leucine rich repeat containing 8 family, member B	2210408K08Rik|R75581
5917	mouse, laboratory	10090	Lsg1	224092	MGI:107236	Chr16 cM	Chr16:-(-)	large 60S subunit nuclear export GTPase 1	D16Bwg1547e
55649	mouse, laboratory	10090	Lyn	17096	MGI:96892	Chr4 cM	Chr4:-(+)	LYN proto-oncogene, Src family tyrosine kinase	Hck-2|Yamaguchi sarcoma viral (v-yes-1) oncogene homolog
81816	mouse, laboratory	10090	Mafg	17134	MGI:96911	Chr11 cM	Chr11:-(-)	v-maf musculoaponeurotic fibrosarcoma oncogene family, protein G (avian)	C630022N07Rik
26431	mouse, laboratory	10090	Magi3	99470	MGI:1923484	Chr3 cM	Chr3:-(-)	membrane associated guanylate kinase, WW and PDZ domain containing 3	4732496O19Rik|6530407C02Rik
5296	mouse, laboratory	10090	Mak16	67920	MGI:1915170	Chr8 cM	Chr8:-(-)	MAK16 homolog	2600016B03Rik|Rbm13
4317	mouse, laboratory	10090	Manba	110173	MGI:88175	Chr3 cM	Chr3:-(+)	mannosidase, beta A, lysosomal	2410030O07Rik|B930014J03Rik|Bmn
11636	mouse, laboratory	10090	Manea	242362	MGI:2444484	Chr4 cM	Chr4:-(-)	mannosidase, endo-alpha	4932703L02Rik
8056	mouse, laboratory	10090	Map3k1	26401	MGI:1346872	Chr13 cM	Chr13:-(-)	mitogen-activated protein kinase kinase kinase 1	lg|Mekk|MEKK1
69110	mouse, laboratory	10090	Map3k3	26406	MGI:1346874	Chr11 cM	Chr11:-(+)	mitogen-activated protein kinase kinase kinase 3	MAPKKK3|Mekk3
76377	mouse, laboratory	10090	Map3k9	338372	MGI:2449952	Chr12 cM	Chr12:-(-)	mitogen-activated protein kinase kinase kinase 9	E130314H24Rik|Mlk1
44893	mouse, laboratory	10090	Mapk1ip1l	218975	MGI:2444022	Chr14 cM	Chr14:-(+)	mitogen-activated protein kinase 1 interacting protein 1-like	C130032J12Rik
22790	mouse, laboratory	10090	Mapk8ip3	30957	MGI:1353598	Chr17 cM	Chr17:-(-)	mitogen-activated protein kinase 8 interacting protein 3	c-Jun NH2-terminal kinase (JNK)/stress-activated protein kinase-associated protein 1|D17Wsu15e|Jip3|JNK-interacting protein 3|JSAP1|JSAP1a|JSAP1b|JSAP1c|JSAP1d|JUN/SAPK-associated protein 1|mKIAA1066|sunday driver 2|Syd2
55685	mouse, laboratory	10090	Mapk9	26420	MGI:1346862	Chr11 cM	Chr11:-(+)	mitogen-activated protein kinase 9	c-Jun N-terminal kinase|JNK2|JNK/SAPK alpha|Prkm9
55836	mouse, laboratory	10090	Mapkapk3	102626	MGI:2143163	Chr9 cM	Chr9:-(-)	mitogen-activated protein kinase-activated protein kinase 3	MK3
7428	mouse, laboratory	10090	Mast2	17776	MGI:894676	Chr4 cM	Chr4:-(-)	microtubule associated serine/threonine kinase 2	MAST205|mKIAA0807|Mtssk
23186	mouse, laboratory	10090	Mbnl1	56758	MGI:1928482	Chr3 cM	Chr3:-(+)	muscleblind like splicing factor 1	mKIAA0428
1788	mouse, laboratory	10090	Mbp	17196	MGI:96925	Chr18 cM	Chr18:-(+)	myelin basic protein	golli-mbp|Hmbpr|jve
41185	mouse, laboratory	10090	Mbtd1	103537	MGI:2143977	Chr11 cM	Chr11:-(+)	mbt domain containing 1	hemp
2808	mouse, laboratory	10090	Mbtps1	56453	MGI:1927235	Chr8 cM	Chr8:-(-)	membrane-bound transcription factor peptidase, site 1	0610038M03Rik|S1P|site-1 protease|SKI-1|subtilisin/kexin isozyme-1
7413	mouse, laboratory	10090	Mcl1	17210	MGI:101769	Chr3 cM	Chr3:-(+)	myeloid cell leukemia sequence 1	Mcl-1
18404	mouse, laboratory	10090	Mdfic	16543	MGI:104611	Chr6 cM	Chr6:-(+)	MyoD family inhibitor domain containing	clone 1.5|Kdt1
1793	mouse, laboratory	10090	Mdm2	17246	MGI:96952	Chr10 cM	Chr10:-(-)	transformed mouse 3T3 cell double minute 2	1700007J15Rik|Mdm-2
21002	mouse, laboratory	10090	Med1	19014	MGI:1100846	Chr11 cM	Chr11:-(-)	mediator complex subunit 1	CRSP210|DRIP205|l11Jus15|PBP|Pparbp|TRAP220|TRAP 220
25256	mouse, laboratory	10090	Med13l	76199	MGI:2670178	Chr5 cM	Chr5:-(+)	mediator complex subunit 13-like	2210413I17Rik|6330591G05Rik|9030618F05Rik|mKIAA1025|Thrap2|Trap240L
3153	mouse, laboratory	10090	Med7	66213	MGI:1913463	Chr11 cM	Chr11:-(+)	mediator complex subunit 7	1110063B05Rik|Crsp33|Crsp9
18209	mouse, laboratory	10090	Megf9	230316	MGI:1918264	Chr4 cM	Chr4:-(-)	multiple EGF-like-domains 9	4933405H16Rik|Egfl5|mKIAA0818
34653	mouse, laboratory	10090	Mettl16	67493	MGI:1914743	Chr11 cM	Chr11:-(+)	methyltransferase like 16	2610100D03Rik|2810013M15Rik|A830095F14Rik|Mett10d
16890	mouse, laboratory	10090	Mex3d	237400	MGI:2681847	Chr10 cM	Chr10:-(-)	mex3 RNA binding family member D	MGC:69704|Rkhd1
4333	mouse, laboratory	10090	Mfap3	216760	MGI:1924068	Chr11 cM	Chr11:-(+)	microfibrillar-associated protein 3	2610509F16Rik|2700079M14Rik
1808	mouse, laboratory	10090	Mgat5	107895	MGI:894701	Chr1 cM	Chr1:-(+)	mannoside acetylglucosaminyltransferase 5	4930471A21Rik|5330407H02Rik|beta1,6N-acetylglucosaminyltransferase V|GlcNAc-TV
37980	mouse, laboratory	10090	Minpp1	17330	MGI:1336159	Chr19 cM	Chr19:-(+)	multiple inositol polyphosphate histidine phosphatase 1
37933	mouse, laboratory	10090	Mllt3	70122	MGI:1917372	Chr4 cM	Chr4:-(-)	myeloid/lymphoid or mixed-lineage leukemia; translocated to, 3	2210011H10Rik|2610012I03Rik|3830408D16Rik|Af9|D4Ertd321e
20549	mouse, laboratory	10090	Mmp15	17388	MGI:109320	Chr8 cM	Chr8:-(+)	matrix metallopeptidase 15	Membrane type 2-MMP|MT2-MMP
21331	mouse, laboratory	10090	Mmp24	17391	MGI:1341867	Chr2 cM	Chr2:-(+)	matrix metallopeptidase 24	Membrane type 5-MMP|MT5-MMP
7842	mouse, laboratory	10090	Mnt	17428	MGI:109150	Chr11 cM	Chr11:-(+)	max binding protein	bHLHd3|Rox
12477	mouse, laboratory	10090	Mob2	101513	MGI:1919891	Chr7 cM	Chr7:-(-)	MOB kinase activator 2	1110017M21Rik|2700078K21Rik
1824	mouse, laboratory	10090	Mpg	268395	MGI:97073	Chr11 cM	Chr11:-(+)	N-methylpurine-DNA glycosylase	3-methyladenine DNA glycosylase|Aag|alkylpurine-DNA-N-glycosylase|APNG|Mid1
10104	mouse, laboratory	10090	Mrgbp	73247	MGI:1920497	Chr2 cM	Chr2:-(+)	MRG/MORF4L binding protein	1600027N09Rik
5907	mouse, laboratory	10090	Mrm2	68017	MGI:1915267	Chr5 cM	Chr5:-(-)	mitochondrial rRNA methyltransferase 2	2310037B18Rik|Ftsj2
41665	mouse, laboratory	10090	Mrpl10	107732	MGI:1333801	Chr11 cM	Chr11:-(+)	mitochondrial ribosomal protein L10	0610040E02Rik|MGC:28763|MRP-L8|Rpml8
6747	mouse, laboratory	10090	Mrpl46	67308	MGI:1914558	Chr7 cM	Chr7:-(-)	mitochondrial ribosomal protein L46	3110052F15Rik|LIECG2|P2ECSL
12270	mouse, laboratory	10090	Mrpl53	68499	MGI:1915749	Chr6 cM	Chr6:-(+)	mitochondrial ribosomal protein L53	1110007K17Rik
31983	mouse, laboratory	10090	Mrs2	380836	MGI:2685748	Chr13 cM	Chr13:-(-)	MRS2 magnesium transporter	LOC380836|Mrs2l
1837	mouse, laboratory	10090	Msx2	17702	MGI:97169	Chr13 cM	Chr13:-(-)	msh homeobox 2	Hox8|Hox-8|Hox8.1
3442	mouse, laboratory	10090	Mta1	116870	MGI:2150037	Chr12 cM	Chr12:-(+)	metastasis associated 1
12089	mouse, laboratory	10090	Mtdh	67154	MGI:1914404	Chr15 cM	Chr15:-(+)	metadherin	2610103J23Rik|3D3/Lyric|AEG-1|D8Bwg1112e|Lyric
4347	mouse, laboratory	10090	Mtf1	17764	MGI:101786	Chr4 cM	Chr4:-(+)	metal response element binding transcription factor 1	metalloregulatory transcription factor|metal response element-binding transcription factor 1|MTF-1|Thyls
10472	mouse, laboratory	10090	Mtfr1l	76824	MGI:1924074	Chr4 cM	Chr4:-(-)	mitochondrial fission regulator 1-like	2410166I05Rik|Fam54b
9233	mouse, laboratory	10090	Mtg2	52856	MGI:106565	Chr2 cM	Chr2:-(+)	mitochondrial ribosome associated GTPase 2	1810011P19Rik|2900056P18Rik|D2Bwg0647e|Gtpbp5
49927	mouse, laboratory	10090	Mtif3	76366	MGI:1923616	Chr5 cM	Chr5:-(-)	mitochondrial translational initiation factor 3	2810012L14Rik
9822	mouse, laboratory	10090	Mtmr10	233315	MGI:2142292	Chr7 cM	Chr7:-(+)	myotubularin related protein 10
10403	mouse, laboratory	10090	Mtmr12	268783	MGI:2443034	Chr15 cM	Chr15:-(+)	myotubularin related protein 12	C730015A02Rik|mKIAA1682|Pip3ap
11576	mouse, laboratory	10090	Mul1	68350	MGI:1915600	Chr4 cM	Chr4:-(+)	mitochondrial ubiquitin ligase activator of NFKB 1	0610009K11Rik
40954	mouse, laboratory	10090	Mybbp1a	18432	MGI:106181	Chr11 cM	Chr11:-(+)	MYB binding protein (P160) 1a	p160MBP|p67MBP
31092	mouse, laboratory	10090	Myc	17869	MGI:97250	Chr15 cM	Chr15:-(+)	myelocytomatosis oncogene	bHLHe39|c-myc|Myc2|Niard|Nird
3921	mouse, laboratory	10090	Mycl	16918	MGI:96799	Chr4 cM	Chr4:-(+)	v-myc avian myelocytomatosis viral oncogene lung carcinoma derived	bHLHe38|L-myc|Lmyc1|Lmyc-1|Mycl1
21371	mouse, laboratory	10090	Myo9a	270163	MGI:107735	Chr9 cM	Chr9:-(+)	myosin IXa	4732465J09Rik|C130068I12Rik
3058	mouse, laboratory	10090	Myo9b	17925	MGI:106624	Chr8 cM	Chr8:-(+)	myosin IXb
6891	mouse, laboratory	10090	Naa25	231713	MGI:2442563	Chr5 cM	Chr5:-(+)	N(alpha)-acetyltransferase 25, NatB auxiliary subunit	4833422K13Rik|C330023M02Rik
4352	mouse, laboratory	10090	Nab1	17936	MGI:107564	Chr1 cM	Chr1:-(-)	Ngfi-A binding protein 1
8466	mouse, laboratory	10090	Nagpa	27426	MGI:1351598	Chr16 cM	Chr16:-(-)	N-acetylglucosamine-1-phosphodiester alpha-N-acetylglucosaminidase	alpha-GlcNAcase|UCE
45669	mouse, laboratory	10090	Naif1	71254	MGI:1918504	Chr2 cM	Chr2:-(+)	nuclear apoptosis inducing factor 1	2310007O20Rik|4933440H19Rik
11907	mouse, laboratory	10090	Natd1	24083	MGI:1344388	Chr11 cM	Chr11:-(-)	N-acetyltransferase domain containing 1	F3-2|Gm16515|Gtlf3b
52330	mouse, laboratory	10090	Nav2	78286	MGI:2183691	Chr7 cM	Chr7:-(+)	neuron navigator 2	5330421F07Rik|HELAD1|mKIAA3015|POMFIL2|Rainb1|RAINB2|Unc53H2
10231	mouse, laboratory	10090	Ncbp3	66874	MGI:1914124	Chr11 cM	Chr11:-(+)	nuclear cap binding subunit 3	1200014J11Rik|C130061O14Rik
23251	mouse, laboratory	10090	Nceh1	320024	MGI:2443191	Chr3 cM	Chr3:-(+)	neutral cholesterol ester hydrolase 1	Aadacl1|B230106I24Rik|CPO-BP|mKIAA1363
10604	mouse, laboratory	10090	Ncln	103425	MGI:1926081	Chr10 cM	Chr10:-(-)	nicalin	3100002P13Rik
7859	mouse, laboratory	10090	Ncoa1	17977	MGI:1276523	Chr12 cM	Chr12:-(-)	nuclear receptor coactivator 1	bHLHe74|KAT13A|SRC1|SRC-1|SRC-a/NCoA-1|steroid receptor coactivator-1
65245	mouse, laboratory	10090	Ncoa7	211329	MGI:2444847	Chr10 cM	Chr10:-(-)	nuclear receptor coactivator 7	9030406N13Rik
31370	mouse, laboratory	10090	Ncor2	20602	MGI:1337080	Chr5 cM	Chr5:-(-)	nuclear receptor co-repressor 2	SMRT|SMRTe
20386	mouse, laboratory	10090	Ndst1	15531	MGI:104719	Chr18 cM	Chr18:-(-)	N-deacetylase/N-sulfotransferase (heparan glucosaminyl) 1	1200015G06Rik|b2b2230Clo|glucosaminyl N-deacetylase/N-sulfotransferase 1|Hsst|Ndst-1
40755	mouse, laboratory	10090	Nefh	380684	MGI:97309	Chr11 cM	Chr11:-(-)	neurofilament, heavy polypeptide	mKIAA0845|NEFH|NF200|NF-H
1870	mouse, laboratory	10090	Neo1	18007	MGI:1097159	Chr9 cM	Chr9:-(-)	neogenin	2610028H22Rik|D930014N22Rik|Igdcc2
9127	mouse, laboratory	10090	Nepro	212547	MGI:2384836	Chr16 cM	Chr16:-(+)	nucleolus and neural progenitor protein	BC027231|MGC:27931
4283	mouse, laboratory	10090	Net1	56349	MGI:1927138	Chr13 cM	Chr13:-(-)	neuroepithelial cell transforming gene 1	0610025H04Rik|9530071N24Rik|mNET1|Net1 homolog
4847	mouse, laboratory	10090	Neu3	50877	MGI:1355305	Chr7 cM	Chr7:-(-)	neuraminidase 3	ganglioside sialidase|membrane sialidase
27827	mouse, laboratory	10090	Nfatc3	18021	MGI:103296	Chr8 cM	Chr8:-(+)	nuclear factor of activated T cells, cytoplasmic, calcineurin dependent 3	D8Ertd281e|NFAT4|NFATx
2971	mouse, laboratory	10090	Nfkb1	18033	MGI:97312	Chr3 cM	Chr3:-(-)	nuclear factor of kappa light polypeptide gene enhancer in B cells 1, p105	NF-kappaB|NF kappaB1|NF-kappaB p50|nuclear factor kappaB p50|p50|p50/p105|p50 subunit of NF kappaB
4492	mouse, laboratory	10090	Nfrkb	235134	MGI:2442410	Chr9 cM	Chr9:-(+)	nuclear factor related to kappa B binding protein	A530090G11Rik
136161	mouse, laboratory	10090	Nisch	64652	MGI:1928323	Chr14 cM	Chr14:-(-)	nischarin	1200007D05Rik|3202002H23Rik|edsn
10670	mouse, laboratory	10090	Nkiras1	69721	MGI:1916971	Chr14 cM	Chr14:-(+)	NFKB inhibitor interacting Ras-like protein 1	2400004O09Rik|KBRAS1
84816	mouse, laboratory	10090	Nkrf	77286	MGI:1924536	ChrX cM	ChrX:-(-)	NF-kappaB repressing factor	9430034D17Rik
69027	mouse, laboratory	10090	Nmt1	18107	MGI:102579	Chr11 cM	Chr11:-(+)	N-myristoyltransferase 1
7661	mouse, laboratory	10090	Noct	12457	MGI:109382	Chr3 cM	Chr3:-(+)	nocturnin	Ccr4|Ccrn4l
3979	mouse, laboratory	10090	Nog	18121	MGI:104327	Chr11 cM	Chr11:-(-)	noggin
41505	mouse, laboratory	10090	Nol6	230082	MGI:2140151	Chr4 cM	Chr4:-(-)	nucleolar protein family 6 (RNA-associated)	Nrap
32049	mouse, laboratory	10090	Notch1	18128	MGI:97363	Chr2 cM	Chr2:-(-)	notch 1	9930111A19Rik|lin-12|Mis6|Motch A|N1|Tan1
7865	mouse, laboratory	10090	Notch2	18129	MGI:97364	Chr3 cM	Chr3:-(+)	notch 2	Motch B|N2
4697	mouse, laboratory	10090	Npc2	67963	MGI:1915213	Chr12 cM	Chr12:-(-)	NPC intracellular cholesterol transporter 2	2700012J19Rik|HE1
36199	mouse, laboratory	10090	Npepps	19155	MGI:1101358	Chr11 cM	Chr11:-(-)	aminopeptidase puromycin sensitive	MP100|Psa
41473	mouse, laboratory	10090	Nrbf2	641340	MGI:1354950	Chr10 cM	Chr10:-(-)	nuclear receptor binding factor 2
12921	mouse, laboratory	10090	Nrg4	83961	MGI:1933833	Chr9 cM	Chr9:-(-)	neuregulin 4
2606	mouse, laboratory	10090	Nrip1	268903	MGI:1315213	Chr16 cM	Chr16:-(-)	nuclear receptor interacting protein 1	6030458L20Rik|8430438I05Rik|RIP140
2875	mouse, laboratory	10090	Nrp2	18187	MGI:1100492	Chr1 cM	Chr1:-(+)	neuropilin 2	1110048P06Rik|NP2|NP-2|Npn2|Npn-2
134095	mouse, laboratory	10090	Nsrp1	237859	MGI:2144305	Chr11 cM	Chr11:-(-)	nuclear speckle regulatory protein 1	Ccdc55|NSpr70
8896	mouse, laboratory	10090	Nuak1	77976	MGI:1925226	Chr10 cM	Chr10:-(-)	NUAK family, SNF1-like kinase, 1	B230104P22Rik
8057	mouse, laboratory	10090	Nubp2	26426	MGI:1347072	Chr17 cM	Chr17:-(-)	nucleotide binding protein 2	D17Wsu11e
1839	mouse, laboratory	10090	Nudt1	17766	MGI:109280	Chr5 cM	Chr5:-(+)	nudix (nucleoside diphosphate linked moiety X)-type motif 1	8-oxo-7,8-dihydro-2'-dGTPase|Mth1
10808	mouse, laboratory	10090	Nufip2	68564	MGI:1915814	Chr11 cM	Chr11:-(+)	nuclear fragile X mental retardation protein interacting protein 2	1110001M19Rik|9530056D24Rik
5190	mouse, laboratory	10090	Nup50	18141	MGI:1351502	Chr15 cM	Chr15:-(+)	nucleoporin 50	1700030K07Rik|Npap60
35472	mouse, laboratory	10090	Nup98	269966	MGI:109404	Chr7 cM	Chr7:-(-)	nucleoporin 98	Nup96
11595	mouse, laboratory	10090	Ogfrl1	70155	MGI:1917405	Chr1 cM	Chr1:-(-)	opioid growth factor receptor-like 1	2210417C17Rik
9675	mouse, laboratory	10090	Ogt	108155	MGI:1339639	ChrX cM	ChrX:-(+)	O-linked N-acetylglucosamine (GlcNAc) transferase (UDP-N-acetylglucosamine:polypeptide-N-acetylglucosaminyl transferase)	1110038P24Rik|4831420N21Rik|OGT|Ogtl
8612	mouse, laboratory	10090	Olfm1	56177	MGI:1860437	Chr2 cM	Chr2:-(+)	olfactomedin 1	Noelin 1|Noelin 2|Pancortin 1-4
13117	mouse, laboratory	10090	Orai1	109305	MGI:1925542	Chr5 cM	Chr5:-(+)	ORAI calcium release-activated calcium modulator 1	D730049H07Rik|Tmem142a
4512	mouse, laboratory	10090	Orc2	18393	MGI:1328306	Chr1 cM	Chr1:-(-)	origin recognition complex, subunit 2	Orc2l
68813	mouse, laboratory	10090	Osbpl8	237542	MGI:2443807	Chr10 cM	Chr10:-(+)	oxysterol binding protein-like 8	D330025H14Rik|ORP-8
66103	mouse, laboratory	10090	Otud3	73162	MGI:1920412	Chr4 cM	Chr4:-(-)	OTU domain containing 3	3110030K17Rik
35370	mouse, laboratory	10090	Otud4	73945	MGI:1098801	Chr8 cM	Chr8:-(+)	OTU domain containing 4	4930431L18Rik|D8Ertd69e|mKIAA1046
10624	mouse, laboratory	10090	Otud7b	229603	MGI:2654703	Chr3 cM	Chr3:-(+)	OTU domain containing 7B	2900060B22Rik|4930463P07Rik|Za20d1
31288	mouse, laboratory	10090	Oxsr1	108737	MGI:1917378	Chr9 cM	Chr9:-(-)	oxidative-stress responsive 1	2210022N24Rik|2810422B09Rik|Osr1
15016	mouse, laboratory	10090	Pacs2	217893	MGI:1924399	Chr12 cM	Chr12:-(+)	phosphofurin acidic cluster sorting protein 2	6720425G15Rik|mKIAA0602|Pacs1l
1932	mouse, laboratory	10090	Pafah1b2	18475	MGI:108415	Chr9 cM	Chr9:-(-)	platelet-activating factor acetylhydrolase, isoform 1b, subunit 2	mus[b]|PAF-AH 30|Pafahb
10198	mouse, laboratory	10090	Pag1	94212	MGI:2443160	Chr3 cM	Chr3:-(-)	phosphoprotein associated with glycosphingolipid microdomains 1	Cbp|F730007C19Rik
8453	mouse, laboratory	10090	Pald1	27355	MGI:1351623	Chr10 cM	Chr10:-(-)	phosphatase domain containing, paladin 1	mKIAA1274|paladin|X99384
32702	mouse, laboratory	10090	Paqr8	74229	MGI:1921479	Chr1 cM	Chr1:-(+)	progestin and adipoQ receptor family member VIII	1700019B16Rik|3110001D06Rik
10489	mouse, laboratory	10090	Pard3	93742	MGI:2135608	Chr8 cM	Chr8:-(+)	par-3 family cell polarity regulator	ASIP|D8Ertd580e|Par3|PAR-3|Pard3a
23302	mouse, laboratory	10090	Pard6b	58220	MGI:2135605	Chr2 cM	Chr2:-(+)	par-6 family cell polarity regulator beta
36487	mouse, laboratory	10090	Pard6g	93737	MGI:2135606	Chr18 cM	Chr18:-(+)	par-6 family cell polarity regulator gamma	2410049N21Rik
38295	mouse, laboratory	10090	Park7	57320	MGI:2135637	Chr4 cM	Chr4:-(-)	Parkinson disease (autosomal recessive, early onset) 7	DJ-1
12613	mouse, laboratory	10090	Pcdh1	75599	MGI:104692	Chr18 cM	Chr18:-(-)	protocadherin 1	2010005A06Rik
5174	mouse, laboratory	10090	Pcgf2	22658	MGI:99161	Chr11 cM	Chr11:-(-)	polycomb group ring finger 2	mel-18|Mel18|Rnf110|Zfp144
11134	mouse, laboratory	10090	Pcif1	228866	MGI:2443858	Chr2 cM	Chr2:-(+)	phosphorylated CTD interacting factor 1	2310022K11Rik|F730014I05Rik
14180	mouse, laboratory	10090	Pcmtd1	319263	MGI:2441773	Chr1 cM	Chr1:-(+)	protein-L-isoaspartate (D-aspartate) O-methyltransferase domain containing 1	8430411F12Rik|A030012M09Rik
3680	mouse, laboratory	10090	Pcyt1a	13026	MGI:88557	Chr16 cM	Chr16:-(+)	phosphate cytidylyltransferase 1, choline, alpha isoform	Cctalpha|CTalpha|Ctpct|CTP:phosphocholine cytidylyltransferase alpha|Cttalpha
38043	mouse, laboratory	10090	Pdcl	67466	MGI:1914716	Chr2 cM	Chr2:-(-)	phosducin-like	1200011E13Rik|PhLP1
31361	mouse, laboratory	10090	Pdgfra	18595	MGI:97530	Chr5 cM	Chr5:-(+)	platelet derived growth factor receptor, alpha polypeptide	CD140a|Pdgfr-2
129720	mouse, laboratory	10090	Pdk4	27273	MGI:1351481	Chr6 cM	Chr6:-(-)	pyruvate dehydrogenase kinase, isoenzyme 4
37643	mouse, laboratory	10090	Pdpk1	18607	MGI:1338068	Chr17 cM	Chr17:-(-)	3-phosphoinositide dependent protein kinase 1	Pdk1|Pkb kinase
14879	mouse, laboratory	10090	Pdzd8	107368	MGI:2677270	Chr19 cM	Chr19:-(-)	PDZ domain containing 8	A630041P07Rik|Pdzk8
18259	mouse, laboratory	10090	Peak1	244895	MGI:2442366	Chr9 cM	Chr9:-(-)	pseudopodium-enriched atypical kinase 1	1110049L02Rik|C230081A13Rik|NKF3 kinase family member
41431	mouse, laboratory	10090	Peli2	93834	MGI:1891445	Chr14 cM	Chr14:-(+)	pellino 2
5984	mouse, laboratory	10090	Pes1	64934	MGI:1890613	Chr11 cM	Chr11:-(+)	pescadillo ribosomal biogenesis factor 1
37936	mouse, laboratory	10090	Pex14	56273	MGI:1927868	Chr4 cM	Chr4:-(-)	peroxisomal biogenesis factor 14	Pex14p
9793	mouse, laboratory	10090	Pgpep1	66522	MGI:1913772	Chr8 cM	Chr8:-(-)	pyroglutamyl-peptidase I	2810003H13Rik|Pcp|PGP-I
10558	mouse, laboratory	10090	Phax	56698	MGI:1891839	Chr18 cM	Chr18:-(+)	phosphorylated adaptor for RNA export	2810055C14Rik|4933427L19Rik|D18Ertd65e|p55|Phax|phosphorylation regulated|Rnuxa
10841	mouse, laboratory	10090	Phf12	268448	MGI:1924057	Chr11 cM	Chr11:-(+)	PHD finger protein 12	2410142K10Rik|mKIAA1523|PF1
17822	mouse, laboratory	10090	Phf13	230936	MGI:2446217	Chr4 cM	Chr4:-(-)	PHD finger protein 13	SPOC1
13330	mouse, laboratory	10090	Phospho1	237928	MGI:2447348	Chr11 cM	Chr11:-(+)	phosphatase, orphan 1	D11Moh36
22953	mouse, laboratory	10090	Pias1	56469	MGI:1913125	Chr9 cM	Chr9:-(-)	protein inhibitor of activated STAT 1	2900068C24Rik|Ddxbp1|GBP
20979	mouse, laboratory	10090	Pias2	17344	MGI:1096566	Chr18 cM	Chr18:-(+)	protein inhibitor of activated STAT 2	6330408K17Rik|ARIP3|Dib|Miz1|PIASxalpha|PIASxb|PIASxbeta
104136	mouse, laboratory	10090	Pias4	59004	MGI:2136940	Chr10 cM	Chr10:-(-)	protein inhibitor of activated STAT 4	PIASy
9924	mouse, laboratory	10090	Pid1	98496	MGI:2138391	Chr1 cM	Chr1:-(-)	phosphotyrosine interaction domain containing 1	5033414K04Rik
3570	mouse, laboratory	10090	Pigb	55981	MGI:1891825	Chr9 cM	Chr9:-(-)	phosphatidylinositol glycan anchor biosynthesis, class B
4002	mouse, laboratory	10090	Pigk	329777	MGI:1913863	Chr3 cM	Chr3:-(+)	phosphatidylinositol glycan anchor biosynthesis, class K	3000001O05Rik
31761	mouse, laboratory	10090	Pigo	56703	MGI:1861452	Chr4 cM	Chr4:-(-)	phosphatidylinositol glycan anchor biosynthesis, class O
31228	mouse, laboratory	10090	Pigq	14755	MGI:1333114	Chr17 cM	Chr17:-(-)	phosphatidylinositol glycan anchor biosynthesis, class Q	Gpi1|Gpi1h|Gpi1p|Gpih
41963	mouse, laboratory	10090	Pigs	276846	MGI:2687325	Chr11 cM	Chr11:-(+)	phosphatidylinositol glycan anchor biosynthesis, class S	LOC245087|LOC276846
20581	mouse, laboratory	10090	Pik3c2a	18704	MGI:1203729	Chr7 cM	Chr7:-(-)	phosphatidylinositol-4-phosphate 3-kinase catalytic subunit type 2 alpha	PI3KC2
21249	mouse, laboratory	10090	Pik3ca	18706	MGI:1206581	Chr3 cM	Chr3:-(+)	phosphatidylinositol-4,5-bisphosphate 3-kinase catalytic subunit alpha	6330412C24Rik|caPI3K|p110alpha
3686	mouse, laboratory	10090	Pik3cd	18707	MGI:1098211	Chr4 cM	Chr4:-(-)	phosphatidylinositol-4,5-bisphosphate 3-kinase catalytic subunit delta	2410099E07Rik|2610208K16Rik|p110delta
7889	mouse, laboratory	10090	Pik3r1	18708	MGI:97583	Chr13 cM	Chr13:-(-)	phosphoinositide-3-kinase regulatory subunit 1	p50alpha|p55alpha|p85alpha|PI3K
24678	mouse, laboratory	10090	Pik3r4	75669	MGI:1922919	Chr9 cM	Chr9:-(+)	phosphoinositide-3-kinase regulatory subunit 4	p150|Vps15
11214	mouse, laboratory	10090	Pim1	18712	MGI:97584	Chr17 cM	Chr17:-(+)	proviral integration site 1	Pim-1
37995	mouse, laboratory	10090	Pip4k2a	18718	MGI:1298206	Chr2 cM	Chr2:-(-)	phosphatidylinositol-5-phosphate 4-kinase, type II, alpha	Pip5k2a
81653	mouse, laboratory	10090	Pisd	320951	MGI:2445114	Chr5 cM	Chr5:-(-)	phosphatidylserine decarboxylase	9030221M09Rik
55454	mouse, laboratory	10090	Pitx2	18741	MGI:109340	Chr3 cM	Chr3:-(+)	paired-like homeodomain transcription factor 2	Brx1|Brx1a|Brx1b|Munc30|Otlx2|Pitx2a|Pitx2b|Pitx2c|Ptx2|Rieg|solurshin
3363	mouse, laboratory	10090	Pknox1	18771	MGI:1201409	Chr17 cM	Chr17:-(+)	Pbx/knotted 1 homeobox	D17Wsu76e|PREP1
8200	mouse, laboratory	10090	Pla2g15	192654	MGI:2178076	Chr8 cM	Chr8:-(+)	phospholipase A2, group XV	C87498|LLPL|Lpla2|Lypla3
1994	mouse, laboratory	10090	Plagl2	54711	MGI:1933165	Chr2 cM	Chr2:-(-)	pleiomorphic adenoma gene-like 2	mKIAA0198
41822	mouse, laboratory	10090	Plekha2	83436	MGI:1928144	Chr8 cM	Chr8:-(-)	pleckstrin homology domain-containing, family A (phosphoinositide binding specific) member 2	6430512N22Rik|TAPP2
11516	mouse, laboratory	10090	Plekhf1	72287	MGI:1919537	Chr7 cM	Chr7:-(-)	pleckstrin homology domain containing, family F (with FYVE domain) member 1	1810013P09Rik|LAPF
18897	mouse, laboratory	10090	Plekhg1	213783	MGI:2676551	Chr10 cM	Chr10:-(+)	pleckstrin homology domain containing, family G (with RhoGef domain) member 1	D10Ertd733e|mKIAA1209
8871	mouse, laboratory	10090	Plekhm1	353047	MGI:2443207	Chr11 cM	Chr11:-(-)	pleckstrin homology domain containing, family M (with RUN domain) member 1	AP162|B2|D330036J23Rik
9448	mouse, laboratory	10090	Plekho1	67220	MGI:1914470	Chr3 cM	Chr3:-(-)	pleckstrin homology domain containing, family O member 1	2810052M02Rik|CKIP-1|Jza2|JZA-20
256	mouse, laboratory	10090	Plod1	18822	MGI:99907	Chr4 cM	Chr4:-(-)	procollagen-lysine, 2-oxoglutarate 5-dioxygenase 1	2410042F05Rik|LH1|lysyl hydroxylase 1
56426	mouse, laboratory	10090	Plxna1	18844	MGI:107685	Chr6 cM	Chr6:-(-)	plexin A1	2600013D04Rik|NOV|PlexA1|Plxn1
130508	mouse, laboratory	10090	Plxnb1	235611	MGI:2154238	Chr9 cM	Chr9:-(+)	plexin B1	2900002G15Rik|mKIAA0407
37656	mouse, laboratory	10090	Pnn	18949	MGI:1100514	Chr12 cM	Chr12:-(+)	pinin	D12Ertd512e
9022	mouse, laboratory	10090	Pogz	229584	MGI:2442117	Chr3 cM	Chr3:-(+)	pogo transposable element with ZNF domain	9530006B08Rik
13007	mouse, laboratory	10090	Poldip3	73826	MGI:1921076	Chr15 cM	Chr15:-(-)	polymerase (DNA-directed), delta interacting protein 3	1110008P04Rik|PDIP46
9694	mouse, laboratory	10090	Pole3	59001	MGI:1933378	Chr4 cM	Chr4:-(-)	polymerase (DNA directed), epsilon 3 (p17 subunit)	1810034K18Rik|YBL1
41076	mouse, laboratory	10090	Pop5	117109	MGI:2151221	Chr5 cM	Chr5:-(+)	processing of precursor 5, ribonuclease P/MRP family (S. cerevisiae)	1500019J17Rik|2700077E03Rik|Rnasep3
37658	mouse, laboratory	10090	Pou2f1	18986	MGI:101898	Chr1 cM	Chr1:-(-)	POU domain, class 2, transcription factor 1	2810482H01Rik|oct-1|Oct1|Oct-1A|Oct-1B|Oct-1C|Oct-1z|Otf1|Otf-1
49395	mouse, laboratory	10090	Ppip5k1	327655	MGI:2443281	Chr2 cM	Chr2:-(-)	diphosphoinositol pentakisphosphate kinase 1	B430315C20Rik|Hisppd2a|mKIAA0377
33158	mouse, laboratory	10090	Ppm1l	242083	MGI:2139740	Chr3 cM	Chr3:-(+)	protein phosphatase 1 (formerly 2C)-like	5930404J21Rik|Pp2ce|PP2C-epsilon
11615	mouse, laboratory	10090	Ppp1r3b	244416	MGI:2177268	Chr8 cM	Chr8:-(+)	protein phosphatase 1, regulatory subunit 3B	GL
56429	mouse, laboratory	10090	Ppp3cb	19056	MGI:107163	Chr14 cM	Chr14:-(-)	protein phosphatase 3, catalytic subunit, beta isoform	1110063J16Rik|Calnb|Cnab|CnAbeta|PP2BA beta
81737	mouse, laboratory	10090	Ppp4r1	70351	MGI:1917601	Chr17 cM	Chr17:-(+)	protein phosphatase 4, regulatory subunit 1	3110001J10Rik|Pp4r1
17953	mouse, laboratory	10090	Ppp4r2	232314	MGI:3027896	Chr6 cM	Chr6:-(+)	protein phosphatase 4, regulatory subunit 2
6100	mouse, laboratory	10090	Pptc7	320717	MGI:2444593	Chr5 cM	Chr5:-(+)	PTC7 protein phosphatase homolog	9130017A15Rik
56941	mouse, laboratory	10090	Prdm15	114604	MGI:1930121	Chr16 cM	Chr16:-(-)	PR domain containing 15	E130018M06Rik|Zfp298
8235	mouse, laboratory	10090	Prdm4	72843	MGI:1920093	Chr10 cM	Chr10:-(-)	PR domain containing 4	1700031E19Rik|2810470D21Rik|SC1|SC-1
10821	mouse, laboratory	10090	Prex1	277360	MGI:3040696	Chr2 cM	Chr2:-(-)	phosphatidylinositol-3,4,5-trisphosphate-dependent Rac exchange factor 1	P-REX1
17686	mouse, laboratory	10090	Prickle1	106042	MGI:1916034	Chr15 cM	Chr15:-(-)	prickle planar cell polarity protein 1	1110058P22Rik|b2b019Clo|mpk1
5037	mouse, laboratory	10090	Prkdc	19090	MGI:104779	Chr16 cM	Chr16:-(+)	protein kinase, DNA activated, catalytic polypeptide	DNAPDcs|DNA-PK|DNA-PKcs|DOXNPH|dxnph|slip|XRCC7
6323	mouse, laboratory	10090	Prkrip1	66801	MGI:1914051	Chr5 cM	Chr5:-(-)	Prkr interacting protein 1 (IL11 inducible)	8430424D23Rik|C114
12215	mouse, laboratory	10090	Prorsd1	67939	MGI:1915189	Chr11 cM	Chr11:-(-)	prolyl-tRNA synthetase domain containing 1	2010316F05Rik|Ncrna00117|Prdxdd1
17132	mouse, laboratory	10090	Prr5	109270	MGI:1924714	Chr15 cM	Chr15:-(+)	proline rich 5 (renal)	C030017C09Rik|Protor-1
11753	mouse, laboratory	10090	Prr5l	72446	MGI:1919696	Chr2 cM	Chr2:-(-)	proline rich 5 like	2600010E01Rik|4833411O04Rik
106649	mouse, laboratory	10090	Prrc2b	227723	MGI:1923304	Chr2 cM	Chr2:-(+)	proline-rich coiled-coil 2B	5830434P21Rik|Bat2l|mKIAA0515
41015	mouse, laboratory	10090	Prrc2c	226562	MGI:1913754	Chr1 cM	Chr1:-(-)	proline-rich coiled-coil 2C	1810043M20Rik|9630039I18Rik|Bat2d|Bat2l2|mKIAA1096
17734	mouse, laboratory	10090	Prss35	244954	MGI:2444800	Chr9 cM	Chr9:-(+)	protease, serine 35	6030424L22Rik
8462	mouse, laboratory	10090	Ptdss2	27388	MGI:1351664	Chr7 cM	Chr7:-(+)	phosphatidylserine synthase 2	PSS2
7908	mouse, laboratory	10090	Ptgfrn	19221	MGI:1277114	Chr3 cM	Chr3:-(-)	prostaglandin F2 receptor negative regulator	4833445A08Rik|CD9P-1
7314	mouse, laboratory	10090	Ptk2	14083	MGI:95481	Chr15 cM	Chr15:-(-)	PTK2 protein tyrosine kinase 2	Fadk|FAK|FRNK
4279	mouse, laboratory	10090	Pura	19290	MGI:103079	Chr18 cM	Chr18:-(+)	purine rich element binding protein A	CAGER-1|Pur alpha|Pur-alpha|ssCRE-BP
5129	mouse, laboratory	10090	Pwp1	103136	MGI:1914735	Chr10 cM	Chr10:-(+)	PWP1 homolog, endonuclein	2310058A11Rik|2610205J09Rik
41788	mouse, laboratory	10090	Pym1	78428	MGI:1925678	Chr10 cM	Chr10:-(+)	PYM homolog 1, exon junction complex associated factor	A030010B05Rik|Pym|PYM Protein|Wibg
11059	mouse, laboratory	10090	Qk	19317	MGI:97837	Chr17 cM	Chr17:-(-)	quaking, KH domain containing RNA binding	1110003F05Rik|l(17)-1Wis|l17Wis1|QkI
9108	mouse, laboratory	10090	R3hdm1	226412	MGI:2448514	Chr1 cM	Chr1:-(+)	R3H domain containing 1
49396	mouse, laboratory	10090	Rab11fip3	215445	MGI:2444431	Chr17 cM	Chr17:-(-)	RAB11 family interacting protein 3 (class II)	D030060O14Rik|mKIAA0665|Rab11-FIP3
8803	mouse, laboratory	10090	Rab11fip4	268451	MGI:2442920	Chr11 cM	Chr11:-(+)	RAB11 family interacting protein 4 (class II)	A730072L08Rik|mKIAA1821|RAB11-FIP4
8991	mouse, laboratory	10090	Rab21	216344	MGI:894308	Chr10 cM	Chr10:-(-)	RAB21, member RAS oncogene family
22815	mouse, laboratory	10090	Rab30	75985	MGI:1923235	Chr7 cM	Chr7:-(+)	RAB30, member RAS oncogene family	5033421K01Rik
5001	mouse, laboratory	10090	Rab31	106572	MGI:1914603	Chr17 cM	Chr17:-(-)	RAB31, member RAS oncogene family	1700093E07Rik
21361	mouse, laboratory	10090	Rab35	77407	MGI:1924657	Chr5 cM	Chr5:-(+)	RAB35, member RAS oncogene family	9530019H02Rik|H-ray|RAB1C
100934	mouse, laboratory	10090	Rab8a	17274	MGI:96960	Chr8 cM	Chr8:-(+)	RAB8A, member RAS oncogene family	Mel
3451	mouse, laboratory	10090	Rabep1	54189	MGI:1860236	Chr11 cM	Chr11:-(+)	rabaptin, RAB GTPase binding effector protein 1	neurocrescin|RAB5 effector protein|rabaptin-5
11674	mouse, laboratory	10090	Rabl6	227624	MGI:2442633	Chr2 cM	Chr2:-(-)	RAB, member RAS oncogene family-like 6	B230208H17Rik|Rbel1|Rbel1a|Rbel1b
48145	mouse, laboratory	10090	Raf1	110157	MGI:97847	Chr6 cM	Chr6:-(-)	v-raf-leukemia viral oncogene 1	6430402F14Rik|c-Raf|Craf1|Raf-1|sarcoma 3611 oncogene|v-Raf
4940	mouse, laboratory	10090	Ralbp1	19765	MGI:108466	Chr17 cM	Chr17:-(-)	ralA binding protein 1	Rip1|RLIP76
65163	mouse, laboratory	10090	Ralgps1	241308	MGI:1922008	Chr2 cM	Chr2:-(-)	Ral GEF with PH domain and SH3 binding motif 1	5830418G11Rik|mKIAA0351|RALGEF2|RALGPS1A
23421	mouse, laboratory	10090	Ralgps2	78255	MGI:1925505	Chr1 cM	Chr1:-(-)	Ral GEF with PH domain and SH3 binding motif 2	1810020P17Rik|2210408F11Rik|4921528G01Rik|9130014M22Rik
50501	mouse, laboratory	10090	Rapgef1	107746	MGI:104580	Chr2 cM	Chr2:-(+)	Rap guanine nucleotide exchange factor (GEF) 1	4932418O06Rik|C3G|Grf2
71030	mouse, laboratory	10090	Raph1	77300	MGI:1924550	Chr1 cM	Chr1:-(-)	Ras association (RalGDS/AF-6) and pleckstrin homology domains 1	9430025M21Rik|C730009O10Rik|lamellipodin|Lpd
23383	mouse, laboratory	10090	Rbm15	229700	MGI:2443205	Chr3 cM	Chr3:-(-)	RNA binding motif protein 15	C230088J01Rik
8325	mouse, laboratory	10090	Rbm15b	109095	MGI:1923598	Chr9 cM	Chr9:-(-)	RNA binding motif protein 15B	1810017N16Rik
137386	mouse, laboratory	10090	Rbm33	381626	MGI:1919670	Chr5 cM	Chr5:-(+)	RNA binding motif protein 33	3200001K10Rik|6430512A10Rik|Prr8
7511	mouse, laboratory	10090	Rbpj	19664	MGI:96522	Chr5 cM	Chr5:-(+)	recombination signal binding protein for immunoglobulin kappa J region	CBF1|Igkjrb|Igkrsbp|RBPjk|RBP-J kappa|Rbpsuh
41477	mouse, laboratory	10090	Rbsn	78287	MGI:1925537	Chr6 cM	Chr6:-(-)	rabenosyn, RAB effector	5330426D11Rik|Rabenosyn-5|Zfyve20
32246	mouse, laboratory	10090	Rcor1	217864	MGI:106340	Chr12 cM	Chr12:-(+)	REST corepressor 1	6720480E22Rik|D12Wsu95e|mKIAA0071|Rocr1
135671	mouse, laboratory	10090	Rcor3	214742	MGI:2441920	Chr1 cM	Chr1:-(-)	REST corepressor 3	4921514E24Rik|C730034D20Rik|E130101E15Rik
8101	mouse, laboratory	10090	Rere	68703	MGI:2683486	Chr4 cM	Chr4:-(+)	arginine glutamic acid dipeptide (RE) repeats	1110033A15Rik|Atr2|atrophin-2|eye03|eye<m03Jus>|eyes3|mKIAA0458
12116	mouse, laboratory	10090	Rffl	67338	MGI:1914588	Chr11 cM	Chr11:-(-)	ring finger and FYVE like domain containing protein	1700051E09Rik|4930516L10Rik|Carp2|Carp-2|fring|rififylin
30980	mouse, laboratory	10090	Rfx2	19725	MGI:106583	Chr17 cM	Chr17:-(-)	regulatory factor X, 2 (influences HLA class II expression)	5430432H19Rik
11275	mouse, laboratory	10090	Rfx7	319758	MGI:2442675	Chr9 cM	Chr9:-(+)	regulatory factor X, 7	2510005N23Rik|9930116O05Rik|D130086K05Rik|Rfxdc2
8863	mouse, laboratory	10090	Rgp1	242406	MGI:1915956	Chr4 cM	Chr4:-(+)	RAB6A GEF compex partner 1	1110029E03Rik|mKIAA0258
23320	mouse, laboratory	10090	Rgs19	56470	MGI:1915153	Chr2 cM	Chr2:-(-)	regulator of G-protein signaling 19	2610042F04Rik
32085	mouse, laboratory	10090	Rhbdf1	13650	MGI:104328	Chr11 cM	Chr11:-(-)	rhomboid 5 homolog 1	Dist|Dist1|Egfr-rs
68377	mouse, laboratory	10090	Rhob	11852	MGI:107949	Chr12 cM	Chr12:-(-)	ras homolog family member B	Arhb
22873	mouse, laboratory	10090	Rhobtb2	246710	MGI:2180557	Chr14 cM	Chr14:-(-)	Rho-related BTB domain containing 2	Dbc2|E130206H14Rik|mKIAA0717
22704	mouse, laboratory	10090	Rhoq	104215	MGI:1931553	Chr17 cM	Chr17:-(+)	ras homolog family member Q	Arhq|TC10
49663	mouse, laboratory	10090	Rhou	69581	MGI:1916831	Chr8 cM	Chr8:-(+)	ras homolog family member U	2310026M05Rik|Arhu|CDC42L1|mG28K|WRCH1|WRCH-1
13806	mouse, laboratory	10090	Ric1	226089	MGI:1924893	Chr19 cM	Chr19:-(+)	RAB6A GEF complex partner 1	C030046E11Rik|C130057E09Rik
18968	mouse, laboratory	10090	Rimklb	108653	MGI:1918325	Chr6 cM	Chr6:-(-)	ribosomal modification protein rimK-like family member B	4931417E21Rik|4933426K21Rik|NAAGS
2820	mouse, laboratory	10090	Ripk1	19766	MGI:108212	Chr13 cM	Chr13:-(+)	receptor (TNFRSF)-interacting serine-threonine kinase 1	Rinp|Rip1
10772	mouse, laboratory	10090	Ripk4	72388	MGI:1919638	Chr16 cM	Chr16:-(-)	receptor-interacting serine-threonine kinase 4	ANKK2|Ankrd3|DIk|PKK|RIP4
56003	mouse, laboratory	10090	Rit1	19769	MGI:108053	Chr3 cM	Chr3:-(+)	Ras-like without CAAX 1	Rit
21074	mouse, laboratory	10090	Rnd3	74194	MGI:1921444	Chr2 cM	Chr2:-(-)	Rho family GTPase 3	2610017M01Rik|Arhe|Rhoe
4146	mouse, laboratory	10090	Rnf103	22644	MGI:109483	Chr6 cM	Chr6:-(+)	ring finger protein 103	kf-1|Zfp103
9741	mouse, laboratory	10090	Rnf111	93836	MGI:1934919	Chr9 cM	Chr9:-(-)	ring finger 111	Arkadia
14427	mouse, laboratory	10090	Rnf145	74315	MGI:1921565	Chr11 cM	Chr11:-(+)	ring finger protein 145	3732413I11Rik
47510	mouse, laboratory	10090	Rnf169	108937	MGI:1920257	Chr7 cM	Chr7:-(-)	ring finger protein 169	2900057K09Rik
2199	mouse, laboratory	10090	Rnf2	19821	MGI:1101759	Chr1 cM	Chr1:-(-)	ring finger protein 2	dinG|Ring1B
5223	mouse, laboratory	10090	Rnf24	51902	MGI:1261771	Chr2 cM	Chr2:-(-)	ring finger protein 24	2810473M14Rik|4930505A13Rik|C86507|D2Ertd504e
12924	mouse, laboratory	10090	Rnf26	213211	MGI:2388131	Chr9 cM	Chr9:-(-)	ring finger protein 26	8030450I18Rik
2944	mouse, laboratory	10090	Rnf8	58230	MGI:1929069	Chr17 cM	Chr17:-(+)	ring finger protein 8	3830404E21Rik|AIP37
37851	mouse, laboratory	10090	Rngtt	24018	MGI:1329041	Chr4 cM	Chr4:-(+)	RNA guanylyltransferase and 5'-phosphatase	mouse capping enzyme
21010	mouse, laboratory	10090	Rock2	19878	MGI:107926	Chr12 cM	Chr12:-(+)	Rho-associated coiled-coil containing protein kinase 2	B230113H15Rik|Rho-kinase|Rock2m|Rock-II|ROKalpha
55831	mouse, laboratory	10090	Ror2	26564	MGI:1347521	Chr13 cM	Chr13:-(-)	receptor tyrosine kinase-like orphan receptor 2	Ntrkr2
56594	mouse, laboratory	10090	Rora	19883	MGI:104661	Chr9 cM	Chr9:-(+)	RAR-related orphan receptor alpha	9530021D13Rik|Nr1f1|tmgc26
32269	mouse, laboratory	10090	Rpap1	68925	MGI:1916175	Chr2 cM	Chr2:-(-)	RNA polymerase II associated protein 1	1190005L06Rik|A730023M06Rik|mKIAA1403
18407	mouse, laboratory	10090	Rps19bp1	66538	MGI:1913788	Chr15 cM	Chr15:-(-)	ribosomal protein S19 binding protein 1	2510038A11Rik|S19BP
80210	mouse, laboratory	10090	Rptor	74370	MGI:1921620	Chr11 cM	Chr11:-(+)	regulatory associated protein of MTOR, complex 1	4932417H02Rik|mKIAA1303|Rap|raptor
12424	mouse, laboratory	10090	Rpusd1	106707	MGI:1919186	Chr17 cM	Chr17:-(+)	RNA pseudouridylate synthase domain containing 1	2310051D06Rik
39141	mouse, laboratory	10090	Rragc	54170	MGI:1858751	Chr4 cM	Chr4:-(+)	Ras-related GTP binding C	Gtr2|TIB929|YGR163W
2218	mouse, laboratory	10090	Rreb1	68750	MGI:2443664	Chr13 cM	Chr13:-(+)	ras responsive element binding protein 1	1110037N09Rik|B930013M22Rik
22370	mouse, laboratory	10090	Rrp12	107094	MGI:2147437	Chr19 cM	Chr19:-(-)	ribosomal RNA processing 12 homolog	mKIAA0690
57086	mouse, laboratory	10090	Rrp1b	72462	MGI:1919712	Chr17 cM	Chr17:-(+)	ribosomal RNA processing 1B	2600005C20Rik|mKIAA0179
3801	mouse, laboratory	10090	Runx1t1	12395	MGI:104793	Chr4 cM	Chr4:-(+)	RUNX1 translocation partner 1	Cbfa2t1h|ETO|MTG8
2220	mouse, laboratory	10090	Rxra	20181	MGI:98214	Chr2 cM	Chr2:-(+)	retinoid X receptor alpha	9530071D11Rik|RXRalpha1|RXR alpha 1
3829	mouse, laboratory	10090	S1pr3	13610	MGI:1339365	Chr13 cM	Chr13:-(+)	sphingosine-1-phosphate receptor 3	Edg3|LPb3|S1P3
2230	mouse, laboratory	10090	Sall1	58198	MGI:1889585	Chr8 cM	Chr8:-(-)	spalt like transcription factor 1	Msal-3
41670	mouse, laboratory	10090	Samd8	67630	MGI:1914880	Chr14 cM	Chr14:-(+)	sterile alpha motif domain containing 8	1110053F04Rik|1700010P07Rik|Smsr
11632	mouse, laboratory	10090	Sap30l	50724	MGI:1354709	Chr11 cM	Chr11:-(+)	SAP30-like	2310079P12Rik|L55
90897	mouse, laboratory	10090	Sar1a	20224	MGI:98230	Chr10 cM	Chr10:-(+)	secretion associated Ras related GTPase 1A	1600019H17Rik|Sara1
69182	mouse, laboratory	10090	Sash1	70097	MGI:1917347	Chr10 cM	Chr10:-(-)	SAM and SH3 domain containing 1	1100001C18Rik|2500002E12Rik|A330076K04Rik
2232	mouse, laboratory	10090	Satb1	20230	MGI:105084	Chr17 cM	Chr17:-(-)	special AT-rich sequence binding protein 1	2610306G12Rik
17084	mouse, laboratory	10090	Sbk1	104175	MGI:2135937	Chr7 cM	Chr7:-(+)	SH3-binding kinase 1
37957	mouse, laboratory	10090	Scaf11	72193	MGI:1919443	Chr15 cM	Chr15:-(-)	SR-related CTD-associated factor 11	1110061H03Rik|2610510E10Rik|CASP11|Sfrs2ip|SIP1|SRRP129|Srsf2ip
8928	mouse, laboratory	10090	Scaf8	106583	MGI:1925212	Chr17 cM	Chr17:-(+)	SR-related CTD-associated factor 8	A630086M08Rik|A930036P18Rik|mKIAA1116|Rbm16
41443	mouse, laboratory	10090	Scpep1	74617	MGI:1921867	Chr11 cM	Chr11:-(-)	serine carboxypeptidase 1	2410018F01Rik|4833411K15Rik|Risc
13349	mouse, laboratory	10090	Scyl2	213326	MGI:1289172	Chr10 cM	Chr10:-(-)	SCY1-like 2 (S. cerevisiae)	CVAK104|D10Ertd802e
10706	mouse, laboratory	10090	Scyl3	240880	MGI:1921385	Chr1 cM	Chr1:-(+)	SCY1-like 3 (S. cerevisiae)	1200016D23Rik|Pace1
2252	mouse, laboratory	10090	Sdc1	20969	MGI:1349162	Chr12 cM	Chr12:-(+)	syndecan 1	CD138|syn-1|Synd|Synd1
31121	mouse, laboratory	10090	Sdc4	20971	MGI:1349164	Chr2 cM	Chr2:-(-)	syndecan 4	ryudocan|S4|Synd4|syndecan-4
11101	mouse, laboratory	10090	Sdf2l1	64136	MGI:2149842	Chr16 cM	Chr16:-(-)	stromal cell-derived factor 2-like 1
18923	mouse, laboratory	10090	Secisbp2l	70354	MGI:1917604	Chr2 cM	Chr2:-(-)	SECIS binding protein 2-like	3110001I20Rik
31358	mouse, laboratory	10090	Sema3a	20346	MGI:107558	Chr5 cM	Chr5:-(+)	sema domain, immunoglobulin domain (Ig), short basic domain, secreted, (semaphorin) 3A	collapsin-1|Semad|sema III|semaphorin III|SemD
21282	mouse, laboratory	10090	Sema4d	20354	MGI:109244	Chr13 cM	Chr13:-(-)	sema domain, immunoglobulin domain (Ig), transmembrane domain (TM) and short cytoplasmic domain, (semaphorin) 4D	CD100|coll-4|M-sema G|Semacl2|Semaj|semaphorin H|Semcl2
32426	mouse, laboratory	10090	Sema6a	20358	MGI:1203727	Chr18 cM	Chr18:-(-)	sema domain, transmembrane domain (TM), and cytoplasmic domain, (semaphorin) 6A	A730020P05Rik|sema|Sema6A-1|Semaq|VIa
8428	mouse, laboratory	10090	Sema6b	20359	MGI:1202889	Chr17 cM	Chr17:-(-)	sema domain, transmembrane domain (TM), and cytoplasmic domain, (semaphorin) 6B	Sema|Seman|semaZ|VIb
9196	mouse, laboratory	10090	Senp6	215351	MGI:1922075	Chr9 cM	Chr9:-(+)	SUMO/sentrin specific peptidase 6	2810017C20Rik|E130319N12Rik|mKIAA0797
14084	mouse, laboratory	10090	Senp8	71599	MGI:1918849	Chr9 cM	Chr9:-(-)	SUMO/sentrin specific peptidase 8	9130010J17Rik|Den1|Nedp1|Prsc2
15031	mouse, laboratory	10090	Sepsecs	211006	MGI:1098791	Chr5 cM	Chr5:-(-)	Sep (O-phosphoserine) tRNA:Sec (selenocysteine) tRNA synthase	D5Ertd135e|SecS|SLA
8843	mouse, laboratory	10090	Sertad2	58172	MGI:1931026	Chr11 cM	Chr11:-(+)	SERTA domain containing 2	mKIAA0127|Sei2|SEI-2|Trip-Br2
41748	mouse, laboratory	10090	Setd3	52690	MGI:1289184	Chr12 cM	Chr12:-(-)	SET domain containing 3	2610102I01Rik|2610305M23Rik|D12Ertd771e
38743	mouse, laboratory	10090	Setd6	66083	MGI:1913333	Chr8 cM	Chr8:-(+)	SET domain containing 6	0610039J04Rik
4475	mouse, laboratory	10090	Sfn	55948	MGI:1891831	Chr4 cM	Chr4:-(-)	stratifin	14-3-3|14-3-3 sigma|Er|MME1|Ywhas
2266	mouse, laboratory	10090	Sfrp1	20377	MGI:892014	Chr8 cM	Chr8:-(+)	secreted frizzled-related protein 1	2210415K03Rik|sFRP-1
16936	mouse, laboratory	10090	Sfxn5	94282	MGI:2137681	Chr6 cM	Chr6:-(-)	sideroflexin 5	C230001H08Rik
48364	mouse, laboratory	10090	Sgk1	20393	MGI:1340062	Chr10 cM	Chr10:-(+)	serum/glucocorticoid regulated kinase 1	Sgk|Sgk1
27040	mouse, laboratory	10090	Sgms1	208449	MGI:2444110	Chr19 cM	Chr19:-(-)	sphingomyelin synthase 1	9530058O11Rik|SMS1|SMS1alpha1|SMS1alpha2|SMS1beta|SMS1gamma|Tmem23
31122	mouse, laboratory	10090	Sgta	52551	MGI:1098703	Chr10 cM	Chr10:-(-)	small glutamine-rich tetratricopeptide repeat (TPR)-containing, alpha	5330427H01Rik|D10Ertd190e|MGC:6336|Sgt
7317	mouse, laboratory	10090	Sh3pxd2a	14218	MGI:1298393	Chr19 cM	Chr19:-(-)	SH3 and PX domains 2A	2310014D11Rik|Fish|Sh3md1|Tks5
27952	mouse, laboratory	10090	Sh3pxd2b	268396	MGI:2442062	Chr11 cM	Chr11:-(+)	SH3 and PX domains 2B	Fad49|G431001E03Rik|Tks4
10988	mouse, laboratory	10090	Sh3rf1	59009	MGI:1913066	Chr8 cM	Chr8:-(+)	SH3 domain containing ring finger 1	2200003J05Rik|Posh|Sh3md2
10360	mouse, laboratory	10090	Sh3tc1	231147	MGI:2678949	Chr5 cM	Chr5:-(-)	SH3 domain and tetratricopeptide repeats 1	MGC:67153
17078	mouse, laboratory	10090	Shisa2	219134	MGI:2444716	Chr14 cM	Chr14:-(+)	shisa family member 2	9430059P22Rik|MAd2|mShisa|shisa|Tmem46
31683	mouse, laboratory	10090	Shq1	72171	MGI:1919421	Chr6 cM	Chr6:-(-)	SHQ1 homolog (S. cerevisiae)	2810403P18Rik|Grim-1
84697	mouse, laboratory	10090	Shroom2	110380	MGI:107194	ChrX cM	ChrX:-(-)	shroom family member 2	Apxl|Shrm2
26615	mouse, laboratory	10090	Shroom4	208431	MGI:2685570	ChrX cM	ChrX:-(+)	shroom family member 4	D430043L16Rik|Shrm4
20654	mouse, laboratory	10090	Siah1a	20437	MGI:108064	Chr8 cM	Chr8:-(-)	siah E3 ubiquitin protein ligase 1A	Sinh1a
7847	mouse, laboratory	10090	Sik1	17691	MGI:104754	Chr17 cM	Chr17:-(-)	salt inducible kinase 1	Msk|Snf1lk
22875	mouse, laboratory	10090	Sik2	235344	MGI:2445031	Chr9 cM	Chr9:-(-)	salt inducible kinase 2	G630080D20Rik|Snf1lk2
3948	mouse, laboratory	10090	Skil	20482	MGI:106203	Chr3 cM	Chr3:-(+)	SKI-like	9130011J04Rik|Skir|sno-dE3|SnoN|SnoN2
37900	mouse, laboratory	10090	Slc16a3	80879	MGI:1933438	Chr11 cM	Chr11:-(+)	solute carrier family 16 (monocarboxylic acid transporters), member 3	MCT3|MCT4|monocarboxylate transporter 4
20984	mouse, laboratory	10090	Slc16a6	104681	MGI:2144585	Chr11 cM	Chr11:-(-)	solute carrier family 16 (monocarboxylic acid transporters), member 6	MGC:27628
41457	mouse, laboratory	10090	Slc22a23	73102	MGI:1920352	Chr13 cM	Chr13:-(-)	solute carrier family 22, member 23	3110004L20Rik
62165	mouse, laboratory	10090	Slc25a25	227731	MGI:1915913	Chr2 cM	Chr2:-(-)	solute carrier family 25 (mitochondrial carrier, phosphate carrier), member 25	1110030N17Rik|mKIAA1896
10039	mouse, laboratory	10090	Slc25a36	192287	MGI:1924909	Chr9 cM	Chr9:-(-)	solute carrier family 25, member 36	C330005L02Rik
74739	mouse, laboratory	10090	Slc25a37	67712	MGI:1914962	Chr14 cM	Chr14:-(-)	solute carrier family 25, member 37	1700020E22Rik|4930513O14Rik|4930526G11Rik|C330015G08Rik|Frascati|Mfrn|Mfrn1|mitoferrin|Mscp
73876	mouse, laboratory	10090	Slc26a2	13521	MGI:892977	Chr18 cM	Chr18:-(-)	solute carrier family 26 (sulfate transporter), member 2	Dtd|ST-OB
74984	mouse, laboratory	10090	Slc30a4	22785	MGI:1345282	Chr2 cM	Chr2:-(-)	solute carrier family 30 (zinc transporter), member 4	Znt4
32380	mouse, laboratory	10090	Slc30a6	210148	MGI:2386741	Chr17 cM	Chr17:-(+)	solute carrier family 30 (zinc transporter), member 6	MGC:11963|ZnT6|ZnT-6
11332	mouse, laboratory	10090	Slc30a7	66500	MGI:1913750	Chr3 cM	Chr3:-(-)	solute carrier family 30 (zinc transporter), member 7	1810059J10Rik|2610034N15Rik|4833428C12Rik|ZnT7|ZnT-7
1399	mouse, laboratory	10090	Slc31a1	20529	MGI:1333843	Chr4 cM	Chr4:-(+)	solute carrier family 31, member 1	4930445G01Rik|Ctr1
41279	mouse, laboratory	10090	Slc35e3	215436	MGI:2448489	Chr10 cM	Chr10:-(-)	solute carrier family 35, member E3	9330166G04Rik
23132	mouse, laboratory	10090	Slc38a2	67760	MGI:1915010	Chr15 cM	Chr15:-(-)	solute carrier family 38, member 2	5033402L14Rik|mKIAA1382|SNAT2
15037	mouse, laboratory	10090	Slc39a14	213053	MGI:2384851	Chr14 cM	Chr14:-(-)	solute carrier family 39 (zinc transporter), member 14	G630015O18Rik|MGC:38539|Zip14
44230	mouse, laboratory	10090	Slc39a3	106947	MGI:2147269	Chr10 cM	Chr10:-(-)	solute carrier family 39 (zinc transporter), member 3	MGC:7461|zip3
17555	mouse, laboratory	10090	Slc43a2	215113	MGI:2442746	Chr11 cM	Chr11:-(+)	solute carrier family 43, member 2	7630402D21Rik
3137	mouse, laboratory	10090	Slc9a3r1	26941	MGI:1349482	Chr11 cM	Chr11:-(+)	solute carrier family 9 (sodium/hydrogen exchanger), member 3 regulator 1	EBP-50|NHE-RF|NHERF1|sodium-hydrogen exchanger regulatory factor
12825	mouse, laboratory	10090	Slirp	380773	MGI:1916394	Chr12 cM	Chr12:-(+)	SRA stem-loop interacting RNA binding protein	1810035L17Rik
3516	mouse, laboratory	10090	Slit2	20563	MGI:1315205	Chr5 cM	Chr5:-(+)	slit guidance ligand 2	b2b1200.1Clo|Drad-1|E030015M03Rik|E130320P19Rik|Slil3
23770	mouse, laboratory	10090	Slx4	52864	MGI:106299	Chr16 cM	Chr16:-(-)	SLX4 structure-specific endonuclease subunit homolog (S. cerevisiae)	Btbd12|D16Bwg1016e
21196	mouse, laboratory	10090	Smad1	17125	MGI:109452	Chr8 cM	Chr8:-(-)	SMAD family member 1	Madh1|Madr1|Smad 1
55937	mouse, laboratory	10090	Smad3	17127	MGI:1201674	Chr9 cM	Chr9:-(-)	SMAD family member 3	Madh3|Smad 3
16989	mouse, laboratory	10090	Smcr8	237782	MGI:2444720	Chr11 cM	Chr11:-(+)	Smith-Magenis syndrome chromosome region, candidate 8 homolog (human)	2310076G09Rik|D030073L15Rik
87074	mouse, laboratory	10090	Smim12	80284	MGI:1933141	Chr4 cM	Chr4:-(+)	small integral membrane protein 12	BC003266|MGC:7764
8708	mouse, laboratory	10090	Smpdl3b	100340	MGI:1916022	Chr4 cM	Chr4:-(-)	sphingomyelin phosphodiesterase, acid-like 3B	1110054A24Rik|Asml3b
110886	mouse, laboratory	10090	Snip1	76793	MGI:2156003	Chr4 cM	Chr4:-(+)	Smad nuclear interacting protein 1	2410133M08Rik
81710	mouse, laboratory	10090	Snn	20621	MGI:1276549	Chr16 cM	Chr16:-(+)	stannin	2810407J07Rik
56557	mouse, laboratory	10090	Snw1	66354	MGI:1913604	Chr12 cM	Chr12:-(-)	SNW domain containing 1	2310008B08Rik|NCoA-62|Skiip|SKIP|SNW1
43132	mouse, laboratory	10090	Snx21	101113	MGI:1917729	Chr2 cM	Chr2:-(+)	sorting nexin family member 21	5730407K14Rik
45165	mouse, laboratory	10090	Snx33	235406	MGI:2443239	Chr9 cM	Chr9:-(-)	sorting nexin 33	E130307J07Rik|Sh3px3
4117	mouse, laboratory	10090	Sos1	20662	MGI:98354	Chr17 cM	Chr17:-(-)	SOS Ras/Rac guanine nucleotide exchange factor 1	4430401P03Rik
4159	mouse, laboratory	10090	Sox13	20668	MGI:98361	Chr1 cM	Chr1:-(-)	SRY (sex determining region Y)-box 13
68298	mouse, laboratory	10090	Sox2	20674	MGI:98364	Chr3 cM	Chr3:-(+)	SRY (sex determining region Y)-box 2	lcc|Sox-2|ysb
40915	mouse, laboratory	10090	Spcs1	69019	MGI:1916269	Chr14 cM	Chr14:-(-)	signal peptidase complex subunit 1 homolog (S. cerevisiae)	1810004F21Rik
9837	mouse, laboratory	10090	Spdl1	70385	MGI:1917635	Chr11 cM	Chr11:-(-)	spindle apparatus coiled-coil protein 1	1700018I02Rik|2600001J17Rik|2810049B11Rik|Ccdc99
15610	mouse, laboratory	10090	Specc1l	74392	MGI:1921642	Chr10 cM	Chr10:-(+)	sperm antigen with calponin homology and coiled-coil domains 1-like	4930470P14Rik|4932439K10Rik|9530057A13Rik|Cytsa|mKIAA0376|Specc1l
35507	mouse, laboratory	10090	Spire1	68166	MGI:1915416	Chr18 cM	Chr18:-(-)	spire type actin nucleation factor 1	6030430B19Rik|Spir-1
24919	mouse, laboratory	10090	Spred1	114715	MGI:2150016	Chr2 cM	Chr2:-(+)	sprouty protein with EVH-1 domain 1, related sequence	5730461F13Rik|Spred-1
11832	mouse, laboratory	10090	Spsb1	74646	MGI:1921896	Chr4 cM	Chr4:-(-)	splA/ryanodine receptor domain and SOCS box containing 1	1110014L01Rik|4930422J18Rik|SSB1
12322	mouse, laboratory	10090	Spsb3	79043	MGI:1891471	Chr17 cM	Chr17:-(+)	splA/ryanodine receptor domain and SOCS box containing 3	2310012N15Rik|3300001M01Rik|SSB3|Tce1
21610	mouse, laboratory	10090	Sptlc2	20773	MGI:108074	Chr12 cM	Chr12:-(-)	serine palmitoyltransferase, long chain base subunit 2	LCB2|Spt2
21120	mouse, laboratory	10090	Src	20779	MGI:98397	Chr2 cM	Chr2:-(+)	Rous sarcoma oncogene	pp60c-src
56686	mouse, laboratory	10090	Srgap3	259302	MGI:2152938	Chr6 cM	Chr6:-(-)	SLIT-ROBO Rho GTPase activating protein 3	Arhgap14|D130026O08Rik|mKIAA0411
110962	mouse, laboratory	10090	Srpk1	20815	MGI:106908	Chr17 cM	Chr17:-(-)	serine/arginine-rich protein specific kinase 1	SR protein-specific kinase 1
32722	mouse, laboratory	10090	Srxn1	76650	MGI:104971	Chr2 cM	Chr2:-(+)	sulfiredoxin 1 homolog (S. cerevisiae)	1700127B04Rik|Npn3|Srx|Srx1
38080	mouse, laboratory	10090	Ss18	268996	MGI:107708	Chr18 cM	Chr18:-(-)	SS18, nBAF chromatin remodeling complex subunit	Ssxt
23411	mouse, laboratory	10090	Ssbp3	72475	MGI:1919725	Chr4 cM	Chr4:-(+)	single-stranded DNA binding protein 3	2610021L12Rik|2610200M23Rik|5730488C10Rik
7539	mouse, laboratory	10090	St3gal3	20441	MGI:1316659	Chr4 cM	Chr4:-(-)	ST3 beta-galactoside alpha-2,3-sialyltransferase 3	Siat3|Siat6|ST3Gal III
37788	mouse, laboratory	10090	Stam	20844	MGI:1329014	Chr2 cM	Chr2:-(+)	signal transducing adaptor molecule (SH3 domain and ITAM motif) 1	STAM1
22837	mouse, laboratory	10090	Stard8	236920	MGI:2448556	ChrX cM	ChrX:-(+)	START domain containing 8
2753	mouse, laboratory	10090	Stc2	20856	MGI:1316731	Chr11 cM	Chr11:-(-)	stanniocalcin 2	mustc2|Stc2l
38122	mouse, laboratory	10090	Stk10	20868	MGI:1099439	Chr11 cM	Chr11:-(+)	serine/threonine kinase 10	Gek1|Lok
56033	mouse, laboratory	10090	Stk38	106504	MGI:2442572	Chr17 cM	Chr17:-(-)	serine/threonine kinase 38	5830476G13Rik|9530097A09Rik|Ndr1
56299	mouse, laboratory	10090	Stk38l	232533	MGI:1922250	Chr6 cM	Chr6:-(+)	serine/threonine kinase 38 like	4930473A22Rik|Ndr2
12542	mouse, laboratory	10090	Stk40	74178	MGI:1921428	Chr4 cM	Chr4:-(+)	serine/threonine kinase 40	2310004N11Rik
15906	mouse, laboratory	10090	Suds3	71954	MGI:1919204	Chr5 cM	Chr5:-(-)	suppressor of defective silencing 3 homolog (S. cerevisiae)	2400003N08Rik|2410008L21Rik
40661	mouse, laboratory	10090	Supt6	20926	MGI:107726	Chr11 cM	Chr11:-(-)	SPT6, histone chaperone and transcription elongation factor	5131400N11Rik|mKIAA0162|SPT6|Supt6h
2386	mouse, laboratory	10090	Supv3l1	338359	MGI:2441711	Chr10 cM	Chr10:-(-)	suppressor of var1, 3-like 1 (S. cerevisiae)	6330443E10Rik
133981	mouse, laboratory	10090	Surf6	20935	MGI:98447	Chr2 cM	Chr2:-(-)	surfeit gene 6	D2Wsu129e|Surf-6
40980	mouse, laboratory	10090	Susd6	217684	MGI:2444661	Chr12 cM	Chr12:-(+)	sushi domain containing 6	4933426M11Rik|mKIAA0247
117703	mouse, laboratory	10090	Synj2	20975	MGI:1201671	Chr17 cM	Chr17:-(+)	synaptojanin 2	mKIAA0348|SJ2
43135	mouse, laboratory	10090	Sys1	66460	MGI:1913710	Chr2 cM	Chr2:-(+)	SYS1 Golgi-localized integral membrane protein homolog (S. cerevisiae)	2610042O14Rik
9213	mouse, laboratory	10090	Szrd1	213491	MGI:1098672	Chr4 cM	Chr4:-(-)	SUZ RNA binding domain containing 1	D4Ertd22e
49413	mouse, laboratory	10090	Szt2	230676	MGI:3033336	Chr4 cM	Chr4:-(-)	SZT2 subunit of KICSTOR complex	MGC:69654|seaizure threshold 2
4461	mouse, laboratory	10090	Tab1	66513	MGI:1913763	Chr15 cM	Chr15:-(+)	TGF-beta activated kinase 1/MAP3K7 binding protein 1	2310012M03Rik|b2b449Clo|Map3k7ip1|Tak1-binding protein 1
9019	mouse, laboratory	10090	Tab2	68652	MGI:1915902	Chr10 cM	Chr10:-(-)	TGF-beta activated kinase 1/MAP3K7 binding protein 2	1110030N06Rik|A530078N03Rik|Map3k7ip2|mKIAA0733|Tak1 binding protein 2
4633	mouse, laboratory	10090	Tada3	101206	MGI:1915724	Chr6 cM	Chr6:-(-)	transcriptional adaptor 3	1110004B19Rik|ADA3|Tada3l
31137	mouse, laboratory	10090	Taf2	319944	MGI:2443028	Chr15 cM	Chr15:-(-)	TATA-box binding protein associated factor 2	150kDa|4732460C16Rik|CIF150|TAF2B|TAFII150
5064	mouse, laboratory	10090	Taf5	226182	MGI:2442144	Chr19 cM	Chr19:-(+)	TATA-box binding protein associated factor 5	6330528C20Rik
8676	mouse, laboratory	10090	Taf5l	102162	MGI:1919039	Chr8 cM	Chr8:-(-)	TATA-box binding protein associated factor 5 like	1110005N04Rik
64680	mouse, laboratory	10090	Tanc2	77097	MGI:2444121	Chr11 cM	Chr11:-(+)	tetratricopeptide repeat, ankyrin repeat and coiled-coil containing 2	3526402J09Rik|5730590C14Rik
56856	mouse, laboratory	10090	Tbc1d1	57915	MGI:1889508	Chr5 cM	Chr5:-(+)	TBC1 domain family, member 1	1110062G02Rik|mKIAA1108|Nob1|Nobq1
10380	mouse, laboratory	10090	Tbc1d16	207592	MGI:2652878	Chr11 cM	Chr11:-(-)	TBC1 domain family, member 16
32574	mouse, laboratory	10090	Tbc1d20	67231	MGI:1914481	Chr2 cM	Chr2:-(+)	TBC1 domain family, member 20	1110028I04Rik|2810442O16Rik|bs
56694	mouse, laboratory	10090	Tbc1d2b	67016	MGI:1914266	Chr9 cM	Chr9:-(-)	TBC1 domain family, member 2B	1810061M12Rik|mKIAA1055
8834	mouse, laboratory	10090	Tbc1d5	72238	MGI:1919488	Chr17 cM	Chr17:-(-)	TBC1 domain family, member 5	1600014N05Rik
4128	mouse, laboratory	10090	Tbl1x	21372	MGI:1336172	ChrX cM	ChrX:-(+)	transducin (beta)-like 1 X-linked	Tbl1
69382	mouse, laboratory	10090	Tbl1xr1	81004	MGI:2441730	Chr3 cM	Chr3:-(+)	transducin (beta)-like 1X-linked receptor 1	8030499H02Rik|A630076E03Rik|C21|C230089I12Rik|DC42|Ira1|TBLR1
3577	mouse, laboratory	10090	Tbpl1	237336	MGI:1339946	Chr10 cM	Chr10:-(-)	TATA box binding protein-like 1	TLF|Tlp|TRF2|TRP
4371	mouse, laboratory	10090	Tbx3	21386	MGI:98495	Chr5 cM	Chr5:-(+)	T-box 3	D5Ertd189e
11984	mouse, laboratory	10090	Tceanc2	66526	MGI:1913776	Chr4 cM	Chr4:-(-)	transcription elongation factor A (SII) N-terminal and central domain containing 2	2210010B22Rik|2210012G02Rik|6330404A07Rik|Tdeanc2
49770	mouse, laboratory	10090	Tctn1	654470	MGI:3603820	Chr5 cM	Chr5:-(-)	tectonic family member 1	G730031O11Rik|Tect1
22673	mouse, laboratory	10090	Tenm3	23965	MGI:1345183	Chr8 cM	Chr8:-(-)	teneurin transmembrane protein 3	2610100B16Rik|mKIAA1455|Odz3|Ten-m3
9343	mouse, laboratory	10090	Tfb1m	224481	MGI:2146851	Chr17 cM	Chr17:-(-)	transcription factor B1, mitochondrial	MGC:41387
4578	mouse, laboratory	10090	Tfdp2	211586	MGI:107167	Chr9 cM	Chr9:-(+)	transcription factor Dp 2	1110029I05Rik|A330080J22Rik|DP3|DP3|DP-3
40813	mouse, laboratory	10090	Tfip11	54723	MGI:1930075	Chr5 cM	Chr5:-(+)	tuftelin interacting protein 11	Tip39
2436	mouse, laboratory	10090	Tgfbr3	21814	MGI:104637	Chr5 cM	Chr5:-(-)	transforming growth factor, beta receptor III	1110036H20Rik|betaglycan|TBRIII
3141	mouse, laboratory	10090	Tgfbrap1	73122	MGI:2447427	Chr1 cM	Chr1:-(-)	transforming growth factor, beta receptor associated protein 1	3110018K12Rik
31142	mouse, laboratory	10090	Thbs1	21825	MGI:98737	Chr2 cM	Chr2:-(+)	thrombospondin 1	tbsp1|Thbs-1|TSP1|TSP-1
31289	mouse, laboratory	10090	Thrap3	230753	MGI:2442637	Chr4 cM	Chr4:-(-)	thyroid hormone receptor associated protein 3	9330151F09Rik|B230333E16Rik|Trap150
67120	mouse, laboratory	10090	Ticrr	77011	MGI:1924261	Chr7 cM	Chr7:-(+)	TOPBP1-interacting checkpoint and replication regulator	5730590G19Rik
3541	mouse, laboratory	10090	Tjp2	21873	MGI:1341872	Chr19 cM	Chr19:-(-)	tight junction protein 2	ZO-2
21267	mouse, laboratory	10090	Tln1	21894	MGI:1099832	Chr4 cM	Chr4:-(-)	talin 1
12328	mouse, laboratory	10090	Tm2d2	69742	MGI:1916992	Chr8 cM	Chr8:-(+)	TM2 domain containing 2	2410018G23Rik
9560	mouse, laboratory	10090	Tm7sf3	67623	MGI:1914873	Chr6 cM	Chr6:-(-)	transmembrane 7 superfamily member 3	2010003B14Rik
8995	mouse, laboratory	10090	Tmcc1	330401	MGI:2442368	Chr6 cM	Chr6:-(-)	transmembrane and coiled coil domains 1	3632431M01Rik
19600	mouse, laboratory	10090	Tmed8	382620	MGI:1923480	Chr12 cM	Chr12:-(-)	transmembrane p24 trafficking protein 8	6430595O10Rik|LOC382620|Mem1
11900	mouse, laboratory	10090	Tmem121	69195	MGI:1916445	Chr12 cM	Chr12:-(+)	transmembrane protein 121	2410008J05Rik|Hole
32428	mouse, laboratory	10090	Tmem131	56030	MGI:1927110	Chr1 cM	Chr1:-(-)	transmembrane protein 131	2610524E03Rik|CC28|D1Bwg0491e|mKIAA0257|Neg|Rw1|YR-23
10447	mouse, laboratory	10090	Tmem37	170706	MGI:2157899	Chr1 cM	Chr1:-(-)	transmembrane protein 37	Pr1
31144	mouse, laboratory	10090	Tmpo	21917	MGI:106920	Chr10 cM	Chr10:-(-)	thymopoietin	5630400D24Rik|lamina-associated polypeptide 2|LAP2|TP
22519	mouse, laboratory	10090	Tnfaip1	21927	MGI:104961	Chr11 cM	Chr11:-(-)	tumor necrosis factor, alpha-induced protein 1 (endothelial)	Bacurd2|Edp1|Edp-1|Tnfip1
8481	mouse, laboratory	10090	Tnfrsf19	29820	MGI:1352474	Chr14 cM	Chr14:-(-)	tumor necrosis factor receptor superfamily, member 19	TAJ|TAJ-ALPHA|TRADE|Troy
828	mouse, laboratory	10090	Tnfrsf1a	21937	MGI:1314884	Chr6 cM	Chr6:-(+)	tumor necrosis factor receptor superfamily, member 1a	CD120a|p55|p55-R|TNF-alphaR1|TNF-alpha-R1|TNFalpha-R1|TNFAR|Tnfr1|TNF-R1|TNF-R55|TNFR60|TNF receptor alpha chain|TNFRI|TNF-R-I|TNFRp55
66194	mouse, laboratory	10090	Tnrc6b	213988	MGI:2443730	Chr15 cM	Chr15:-(+)	trinucleotide repeat containing 6b	2700090M07Rik|A730065C02Rik|D230019K20Rik|mKIAA1093
23137	mouse, laboratory	10090	Tnrc6c	217351	MGI:2443265	Chr11 cM	Chr11:-(+)	trinucleotide repeat containing 6C	9930033H14Rik|mKIAA1582
49713	mouse, laboratory	10090	Tns3	319939	MGI:2443012	Chr11 cM	Chr11:-(-)	tensin 3	F830010I22Rik|TEM6|Tens1
9447	mouse, laboratory	10090	Tob2	57259	MGI:1888525	Chr15 cM	Chr15:-(-)	transducer of ERBB2, 2	2900090N22Rik|4930545K18Rik|mKIAA1663
11823	mouse, laboratory	10090	Toe1	68276	MGI:1915526	Chr4 cM	Chr4:-(-)	target of EGR1, member 1 (nuclear)	4930584N22Rik|4933424D16Rik
37263	mouse, laboratory	10090	Tor1a	30931	MGI:1353568	Chr2 cM	Chr2:-(-)	torsin family 1, member A (torsin A)	DQ2|Dyt1|Tor1a|torsinA
25260	mouse, laboratory	10090	Tor2a	30933	MGI:1353596	Chr2 cM	Chr2:-(+)	torsin family 2, member A
17140	mouse, laboratory	10090	Tor4a	227612	MGI:2442720	Chr2 cM	Chr2:-(-)	torsin family 4, member A	A830007P12Rik
17525	mouse, laboratory	10090	Tpgs1	110012	MGI:106618	Chr10 cM	Chr10:-(+)	tubulin polyglutamylase complex subunit 1	Gm16517|Gtrgeo22
40799	mouse, laboratory	10090	Tpra1	24100	MGI:1345190	Chr6 cM	Chr6:-(+)	transmembrane protein, adipocyte asscociated 1	40kDa|Gpr175|Tpra40
36427	mouse, laboratory	10090	Trabd	67976	MGI:1915226	Chr15 cM	Chr15:-(+)	TraB domain containing	5730502D15Rik
25103	mouse, laboratory	10090	Trak1	67095	MGI:1914345	Chr9 cM	Chr9:-(+)	trafficking protein, kinesin binding 1	2310001H13Rik|hyrt|nm1952
22861	mouse, laboratory	10090	Trak2	70827	MGI:1918077	Chr1 cM	Chr1:-(-)	trafficking protein, kinesin binding 2	2900022D04Rik|4733401O11Rik|Als2cr3|CALS-C|GRIF1|GRIF-1|mKIAA0549|OIP98
75216	mouse, laboratory	10090	Trib1	211770	MGI:2443397	Chr15 cM	Chr15:-(+)	tribbles pseudokinase 1	A530090O15Rik|Trb1
22882	mouse, laboratory	10090	Trim2	80890	MGI:1933163	Chr3 cM	Chr3:-(-)	tripartite motif-containing 2	narf|neural activity-related ring finger protein
20847	mouse, laboratory	10090	Trio	223435	MGI:1927230	Chr15 cM	Chr15:-(-)	triple functional domain (PTPRF interacting)	6720464I07Rik|Solo
3959	mouse, laboratory	10090	Trp53bp2	209456	MGI:2138319	Chr1 cM	Chr1:-(+)	transformation related protein 53 binding protein 2	53BP2|ASPP2
3960	mouse, laboratory	10090	Trp73	22062	MGI:1336991	Chr4 cM	Chr4:-(-)	transformation related protein 73	deltaNp73|p73|TAp73
9224	mouse, laboratory	10090	Trpc4ap	56407	MGI:1930751	Chr2 cM	Chr2:-(-)	transient receptor potential cation channel, subfamily C, member 4 associated protein	4833429F06Rik|D2Ertd113e|Trp4-associated protein TAP1|Trrp4ap
34714	mouse, laboratory	10090	Trub1	72133	MGI:1919383	Chr19 cM	Chr19:-(+)	TruB pseudouridine (psi) synthase family member 1	2610009I02Rik|9030425C13Rik
41056	mouse, laboratory	10090	Trub2	227682	MGI:2442186	Chr2 cM	Chr2:-(-)	TruB pseudouridine (psi) synthase family member 2	G430055L02Rik
8860	mouse, laboratory	10090	Tsc22d2	72033	MGI:1919283	Chr3 cM	Chr3:-(+)	TSC22 domain family, member 2	1810043J12Rik|5530402M19Rik
41045	mouse, laboratory	10090	Tsku	244152	MGI:2443855	Chr7 cM	Chr7:-(-)	tsukushi, small leucine rich proteoglycan	9530051K01Rik|Lrrc54
23717	mouse, laboratory	10090	Tspan14	52588	MGI:1196325	Chr14 cM	Chr14:-(-)	tetraspanin 14	D14Ertd226e|Tm4sf14
4169	mouse, laboratory	10090	Tssc4	56844	MGI:1861712	Chr7 cM	Chr7:-(+)	tumor-suppressing subchromosomal transferable fragment 4	ESTM671070
16403	mouse, laboratory	10090	Tstd2	272027	MGI:3039624	Chr4 cM	Chr4:-(-)	thiosulfate sulfurtransferase (rhodanese)-like domain containing 2
8226	mouse, laboratory	10090	Ttc33	67515	MGI:1914765	Chr15 cM	Chr15:-(+)	tetratricopeptide repeat domain 33	2410099M07Rik|2900001O04Rik
52649	mouse, laboratory	10090	Ttc9	69480	MGI:1916730	Chr12 cM	Chr12:-(+)	tetratricopeptide repeat domain 9	1700029M07Rik
32678	mouse, laboratory	10090	Ttl	69737	MGI:1916987	Chr2 cM	Chr2:-(+)	tubulin tyrosine ligase	2410003M22Rik|2700049H19Rik
20711	mouse, laboratory	10090	Tulp3	22158	MGI:1329045	Chr6 cM	Chr6:-(-)	tubby-like protein 3	2310022L06Rik
402	mouse, laboratory	10090	Twist1	22160	MGI:98872	Chr12 cM	Chr12:-(+)	twist basic helix-loop-helix transcription factor 1	bHLHa38|charlie chaplin|M-Twist|pdt|Pluridigite|Ska10|Ska<m10Jus>
10774	mouse, laboratory	10090	Twsg1	65960	MGI:2137520	Chr17 cM	Chr17:-(-)	twisted gastrulation BMP signaling modulator 1	1810013J15Rik|9030422N06Rik|D17Ertd403e|Tsg
9301	mouse, laboratory	10090	Txndc11	106200	MGI:1923620	Chr16 cM	Chr16:-(-)	thioredoxin domain containing 11	2810408E11Rik|EF-hand binding protein 1|EFP1|Txdc11
32594	mouse, laboratory	10090	Txndc15	69672	MGI:1916922	Chr13 cM	Chr13:-(+)	thioredoxin domain containing 15	2310047H23Rik
103894	mouse, laboratory	10090	Ube2h	22214	MGI:104632	Chr6 cM	Chr6:-(-)	ubiquitin-conjugating enzyme E2H	1500009C23Rik|E2-20K|Gid3|Ubc8
9730	mouse, laboratory	10090	Ube2q1	70093	MGI:1917343	Chr3 cM	Chr3:-(+)	ubiquitin-conjugating enzyme E2Q family member 1	1110002C01Rik|2310012M18Rik|NICE-5|PRO3094
11319	mouse, laboratory	10090	Ube2z	268470	MGI:1343160	Chr11 cM	Chr11:-(-)	ubiquitin-conjugating enzyme E2Z	C030047H17Rik
3517	mouse, laboratory	10090	Ube4a	140630	MGI:2154580	Chr9 cM	Chr9:-(-)	ubiquitination factor E4A	4732444G18Rik|9930123J21Rik|UFD2b
8336	mouse, laboratory	10090	Ubiad1	71707	MGI:1918957	Chr4 cM	Chr4:-(-)	UbiA prenyltransferase domain containing 1	1200002M06Rik|Tere1
45564	mouse, laboratory	10090	Ubn2	320538	MGI:2444236	Chr6 cM	Chr6:-(+)	ubinuclein 2	2900060J04Rik|6030408G03Rik|D130059P03Rik
15484	mouse, laboratory	10090	Ubtd2	327900	MGI:2444752	Chr11 cM	Chr11:-(+)	ubiquitin domain containing 2	9630054F20Rik
7970	mouse, laboratory	10090	Ubtf	21429	MGI:98512	Chr11 cM	Chr11:-(-)	upstream binding transcription factor, RNA polymerase I	A930005G04Rik|Tcfubf|UBF|UBF1
17076	mouse, laboratory	10090	Ubxn2a	217379	MGI:2442310	Chr12 cM	Chr12:-(-)	UBX domain protein 2A	6330407P03Rik|MGC:7992|Ubxd4
45585	mouse, laboratory	10090	Ubxn7	224111	MGI:2146388	Chr16 cM	Chr16:-(+)	UBX domain protein 7	mKIAA0794|Ubxd7
9816	mouse, laboratory	10090	Uhrf1bp1	224648	MGI:3041238	Chr17 cM	Chr17:-(+)	UHRF1 (ICBP90) binding protein 1	1110020K19Rik|F830021D11Rik
43997	mouse, laboratory	10090	Unc119b	106840	MGI:2147162	Chr5 cM	Chr5:-(-)	unc-119 lipid binding chaperone B
14709	mouse, laboratory	10090	Uqcc1	56046	MGI:1929472	Chr2 cM	Chr2:-(-)	ubiquinol-cytochrome c reductase complex assembly factor 1	2310079L17Rik|2410003P15Rik|3110038N19Rik|Bfzp|Cbp3|mbFZb|Uqcc
8859	mouse, laboratory	10090	Urb2	382038	MGI:2681124	Chr8 cM	Chr8:-(+)	URB2 ribosome biogenesis 2 homolog (S. cerevisiae)	mKIAA0133
19504	mouse, laboratory	10090	Usf3	207806	MGI:2685454	Chr16 cM	Chr16:-(+)	upstream transcription factor family member 3	5530400K22Rik|Gm608|LOC207806|LOC385650
2754	mouse, laboratory	10090	Uso1	56041	MGI:1929095	Chr5 cM	Chr5:-(+)	USO1 vesicle docking factor	TAP|transcytosis associated protein p115|Vdp
8374	mouse, laboratory	10090	Usp25	30940	MGI:1353655	Chr16 cM	Chr16:-(+)	ubiquitin specific peptidase 25
40978	mouse, laboratory	10090	Usp34	17847	MGI:109473	Chr11 cM	Chr11:-(+)	ubiquitin specific peptidase 34	A530081C03Rik|Murr2
10858	mouse, laboratory	10090	Usp37	319651	MGI:2442483	Chr1 cM	Chr1:-(-)	ubiquitin specific peptidase 37	4932415L06Rik|C330008N13Rik
56957	mouse, laboratory	10090	Usp46	69727	MGI:1916977	Chr5 cM	Chr5:-(-)	ubiquitin specific peptidase 46	1190009E20Rik|2410018I08Rik
9929	mouse, laboratory	10090	Usp47	74996	MGI:1922246	Chr7 cM	Chr7:-(+)	ubiquitin specific peptidase 47	4930502N04Rik|A630020C16Rik
34521	mouse, laboratory	10090	Usp53	99526	MGI:2139607	Chr3 cM	Chr3:-(-)	ubiquitin specific peptidase 53	mbo|mKIAA1350|Phxr3|Sp6
31150	mouse, laboratory	10090	Uvrag	78610	MGI:1925860	Chr7 cM	Chr7:-(-)	UV radiation resistance associated gene	9530039D02Rik|Uvragl
2534	mouse, laboratory	10090	Vegfa	22339	MGI:103178	Chr17 cM	Chr17:-(-)	vascular endothelial growth factor A	Vegf|VEGF120|VEGF164|VEGF188|VEGF-A|VPF
18308	mouse, laboratory	10090	Vkorc1l1	69568	MGI:1916818	Chr5 cM	Chr5:-(+)	vitamin K epoxide reductase complex, subunit 1-like 1	2310024K08Rik
6221	mouse, laboratory	10090	Vps35	65114	MGI:1890467	Chr8 cM	Chr8:-(-)	VPS35 retromer complex component	Mem3
5673	mouse, laboratory	10090	Wars2	70560	MGI:1917810	Chr3 cM	Chr3:-(+)	tryptophanyl tRNA synthetase 2 (mitochondrial)	9430020O07Rik|TrpRS
9839	mouse, laboratory	10090	Wbp1l	226178	MGI:107577	Chr19 cM	Chr19:-(+)	WW domain binding protein 1 like	D19Wsu162e
38287	mouse, laboratory	10090	Wbp4	22380	MGI:109568	Chr14 cM	Chr14:-(-)	WW domain binding protein 4	FBP21
14188	mouse, laboratory	10090	Wdfy2	268752	MGI:2442811	Chr14 cM	Chr14:-(+)	WD repeat and FYVE domain containing 2	B130024L21Rik
22855	mouse, laboratory	10090	Wdfy3	72145	MGI:1096875	Chr5 cM	Chr5:-(-)	WD repeat and FYVE domain containing 3	2610509D04Rik|Alfy|Bchs|Bwf1|D5Ertd66e|Ggtb3|mKIAA0993
32684	mouse, laboratory	10090	Wdr20	69641	MGI:1916891	Chr12 cM	Chr12:-(+)	WD repeat domain 20	2310040A13Rik|Wdr20a
9789	mouse, laboratory	10090	Wdr55	67936	MGI:1915186	Chr18 cM	Chr18:-(+)	WD repeat domain 55	2410080P20Rik
117682	mouse, laboratory	10090	Wdr6	83669	MGI:1930140	Chr9 cM	Chr9:-(-)	WD repeat domain 6
42951	mouse, laboratory	10090	Wdr82	77305	MGI:1924555	Chr9 cM	Chr9:-(+)	WD repeat domain containing 82	9430077D24Rik
8562	mouse, laboratory	10090	Wdr91	101240	MGI:2141558	Chr6 cM	Chr6:-(-)	WD repeat domain 91	9530020G05Rik
8997	mouse, laboratory	10090	Wdtc1	230796	MGI:2685541	Chr4 cM	Chr4:-(-)	WD and tetratricopeptide repeats 1	adipose|adp|LOC230796
31152	mouse, laboratory	10090	Wee1	22390	MGI:103075	Chr7 cM	Chr7:-(+)	WEE 1 homolog 1 (S. pombe)	Wee1A
20970	mouse, laboratory	10090	Wnt11	22411	MGI:101948	Chr7 cM	Chr7:-(+)	wingless-type MMTV integration site family, member 11
4756	mouse, laboratory	10090	Wnt6	22420	MGI:98960	Chr1 cM	Chr1:-(+)	wingless-type MMTV integration site family, member 6	Wnt-6
22531	mouse, laboratory	10090	Wnt7b	22422	MGI:98962	Chr15 cM	Chr15:-(-)	wingless-type MMTV integration site family, member 7B	Wnt-7b
10592	mouse, laboratory	10090	Wrnip1	78903	MGI:1926153	Chr13 cM	Chr13:-(+)	Werner helicase interacting protein 1	4833444L21Rik|WHIP
9218	mouse, laboratory	10090	Wsb1	78889	MGI:1926139	Chr11 cM	Chr11:-(-)	WD repeat and SOCS box-containing 1	1110056B13Rik|2700038M07Rik
68422	mouse, laboratory	10090	Wtap	60532	MGI:1926395	Chr17 cM	Chr17:-(-)	Wilms tumour 1-associating protein	2810408K05Rik|9430038B09Rik
69180	mouse, laboratory	10090	Wwc1	211652	MGI:2388637	Chr11 cM	Chr11:-(-)	WW, C2 and coiled-coil domain containing 1	Kibra|MGC:47054
3401	mouse, laboratory	10090	Xpc	22591	MGI:103557	Chr6 cM	Chr6:-(-)	xeroderma pigmentosum, complementation group C
134226	mouse, laboratory	10090	Xpr1	19775	MGI:97932	Chr1 cM	Chr1:-(-)	xenotropic and polytropic retrovirus receptor 1	Rmc1|Rmc-1|suppressor of yeast G<a> deletion|Syg1
23349	mouse, laboratory	10090	Xylt2	217119	MGI:2444797	Chr11 cM	Chr11:-(-)	xylosyltransferase II	E030002B02Rik
4452	mouse, laboratory	10090	Yap1	22601	MGI:103262	Chr9 cM	Chr9:-(-)	yes-associated protein 1	Yap|Yki|yorkie
19062	mouse, laboratory	10090	Ydjc	69101	MGI:1916351	Chr16 cM	Chr16:-(+)	YdjC homolog (bacterial)	1810015A11Rik|4930521M19Rik
55900	mouse, laboratory	10090	Yes1	22612	MGI:99147	Chr5 cM	Chr5:-(+)	YES proto-oncogene 1, Src family tyrosine kinase	Yes
70791	mouse, laboratory	10090	Ypel2	77864	MGI:1925114	Chr11 cM	Chr11:-(-)	yippee like 2	E130113K08Rik
41097	mouse, laboratory	10090	Ypel5	383295	MGI:1916937	Chr17 cM	Chr17:-(+)	yippee like 5	2310076K21Rik|CGI-127
34991	mouse, laboratory	10090	Ythdf3	229096	MGI:1918850	Chr3 cM	Chr3:-(+)	YTH N6-methyladenosine RNA binding protein 3	9130022A11Rik
22725	mouse, laboratory	10090	Ywhag	22628	MGI:108109	Chr5 cM	Chr5:-(-)	tyrosine 3-monooxygenase/tryptophan 5-monooxygenase activation protein, gamma polypeptide	14-3-3 gamma|D7Bwg1348e
2560	mouse, laboratory	10090	Zbtb14	22666	MGI:1195345	Chr17 cM	Chr17:-(+)	zinc finger and BTB domain containing 14	b2b1982Clo|ZF5|Zfp161
10799	mouse, laboratory	10090	Zbtb21	114565	MGI:1927240	Chr16 cM	Chr16:-(-)	zinc finger and BTB domain containing 21	5430437K12Rik|B430213I24Rik|mKIAA1227|Zfp295|Znf295
19382	mouse, laboratory	10090	Zbtb34	241311	MGI:2685195	Chr2 cM	Chr2:-(-)	zinc finger and BTB domain containing 34	LOC241311
13048	mouse, laboratory	10090	Zbtb37	240869	MGI:2444467	Chr1 cM	Chr1:-(-)	zinc finger and BTB domain containing 37	D430004I08Rik
19529	mouse, laboratory	10090	Zbtb38	245007	MGI:2442866	Chr9 cM	Chr9:-(-)	zinc finger and BTB domain containing 38	A930014K01Rik|CIBZ|Zenon homolog
27795	mouse, laboratory	10090	Zbtb41	226470	MGI:2444487	Chr1 cM	Chr1:-(+)	zinc finger and BTB domain containing 41	8430415N23Rik|9830132G07Rik
8514	mouse, laboratory	10090	Zbtb43	71834	MGI:1919084	Chr2 cM	Chr2:-(-)	zinc finger and BTB domain containing 43	1700010E06Rik|mKIAA0414|Zfp297b
34825	mouse, laboratory	10090	Zbtb49	75079	MGI:1922329	Chr5 cM	Chr5:-(-)	zinc finger and BTB domain containing 49	4930518A03Rik|Zfp509
12506	mouse, laboratory	10090	Zbtb8a	73680	MGI:1920930	Chr4 cM	Chr4:-(-)	zinc finger and BTB domain containing 8a	2410081M15Rik
13114	mouse, laboratory	10090	Zc3h10	103284	MGI:2143670	Chr10 cM	Chr10:-(-)	zinc finger CCCH type containing 10
8888	mouse, laboratory	10090	Zc3h11a	70579	MGI:1917829	Chr1 cM	Chr1:-(-)	zinc finger CCCH type containing 11A	1110003F06Rik|5730454B08Rik|G630041M05Rik|mKIAA0663
9582	mouse, laboratory	10090	Zdhhc3	69035	MGI:1926134	Chr9 cM	Chr9:-(-)	zinc finger, DHHC domain containing 3	1110020O22Rik|1810006O10Rik|2210017C02Rik|GODZ|Zfp373
41193	mouse, laboratory	10090	Zdhhc7	102193	MGI:2142662	Chr8 cM	Chr8:-(-)	zinc finger, DHHC domain containing 7
21366	mouse, laboratory	10090	Zfhx3	11906	MGI:99948	Chr8 cM	Chr8:-(+)	zinc finger homeobox 3	A230102L03Rik|Atbf1|Sci|WBP9
12464	mouse, laboratory	10090	Zfp131	72465	MGI:1919715	Chr13 cM	Chr13:-(-)	zinc finger protein 131	2610109I01Rik|Znf131
8003	mouse, laboratory	10090	Zfp148	22661	MGI:1332234	Chr16 cM	Chr16:-(+)	zinc finger protein 148	2210405J08Rik|BERF-1|beta enolase repressor factor 1|BFCOL1|ZBP-89
8493	mouse, laboratory	10090	Zfp292	30046	MGI:1353423	Chr4 cM	Chr4:-(-)	zinc finger protein 292	5730450D02Rik|9430062L07Rik|Krox-10|mKIAA0530|Zfp15|Zfp-15|Zn-15|Zn-16
77409	mouse, laboratory	10090	Zfp362	230761	MGI:2652839	Chr4 cM	Chr4:-(-)	zinc finger protein 362
31276	mouse, laboratory	10090	Zfp36l1	12192	MGI:107946	Chr12 cM	Chr12:-(-)	zinc finger protein 36, C3H type-like 1	Brf1|cMG1|D530020L18Rik|TIS11b
128413	mouse, laboratory	10090	Zfp383	73729	MGI:1920979	Chr7 cM	Chr7:-(+)	zinc finger protein 383	1110003H10Rik
41430	mouse, laboratory	10090	Zfp462	242466	MGI:107690	Chr4 cM	Chr4:-(+)	zinc finger protein 462	9430078C22Rik|Gt4-2|Zfpip
8942	mouse, laboratory	10090	Zfp507	668501	MGI:1916378	Chr7 cM	Chr7:-(-)	zinc finger protein 507	1810022O10Rik|A230056M16Rik|mKIAA1084
69314	mouse, laboratory	10090	Zfp512b	269401	MGI:2685478	Chr2 cM	Chr2:-(-)	zinc finger protein 512B	LOC269401|Znf512b
19378	mouse, laboratory	10090	Zfp518a	72672	MGI:1919922	Chr19 cM	Chr19:-(+)	zinc finger protein 518A	2810401C22Rik|6330417C12Rik|Zfp518
19115	mouse, laboratory	10090	Zfp518b	100515	MGI:2140750	Chr5 cM	Chr5:-(-)	zinc finger protein 518B	6820424L24Rik
8759	mouse, laboratory	10090	Zfp592	233410	MGI:2443541	Chr7 cM	Chr7:-(+)	zinc finger protein 592	A730014M16Rik|mKIAA0211
5672	mouse, laboratory	10090	Zfp598	213753	MGI:2670965	Chr17 cM	Chr17:-(+)	zinc finger protein 598
54768	mouse, laboratory	10090	Zfp652	268469	MGI:2442221	Chr11 cM	Chr11:-(+)	zinc finger protein 652	9530033F24Rik|MGC:67134
64370	mouse, laboratory	10090	Zfp704	170753	MGI:2180715	Chr3 cM	Chr3:-(-)	zinc finger protein 704	Gig1
36423	mouse, laboratory	10090	Zfp750	319530	MGI:2442210	Chr11 cM	Chr11:-(-)	zinc finger protein 750	A030007D23Rik
56721	mouse, laboratory	10090	Zfp777	72306	MGI:1919556	Chr6 cM	Chr6:-(-)	zinc finger protein 777	2500002G23Rik
18529	mouse, laboratory	10090	Zfp800	627049	MGI:1889334	Chr6 cM	Chr6:-(-)	zinc finger protein 800
32345	mouse, laboratory	10090	Zfp821	75871	MGI:1923121	Chr8 cM	Chr8:-(+)	zinc finger protein 821	4930566A11Rik
45622	mouse, laboratory	10090	Zfp827	622675	MGI:2444807	Chr8 cM	Chr8:-(+)	zinc finger protein 827	2810449M09Rik|D630040G17Rik
9000	mouse, laboratory	10090	Zhx3	320799	MGI:2444772	Chr2 cM	Chr2:-(-)	zinc fingers and homeoboxes 3	1810059C13Rik|4932418O04Rik|9530010N21Rik|mKIAA0395|Tix1
55742	mouse, laboratory	10090	Zic3	22773	MGI:106676	ChrX cM	ChrX:-(+)	zinc finger protein of the cerebellum 3	Ka
10667	mouse, laboratory	10090	Zmiz1	328365	MGI:3040693	Chr14 cM	Chr14:-(+)	zinc finger, MIZ-type containing 1	Rai17|Zimp10
12093	mouse, laboratory	10090	Zmynd19	67187	MGI:1914437	Chr2 cM	Chr2:-(+)	zinc finger, MYND domain containing 19	2700064H14Rik
15668	mouse, laboratory	10090	Znrf2	387524	MGI:1196246	Chr6 cM	Chr6:-(+)	zinc and ring finger 2	1190002C14Rik|D6Ertd365e
9728	mouse, laboratory	10090	Zranb1	360216	MGI:106441	Chr7 cM	Chr7:-(+)	zinc finger, RAN-binding domain containing 1	9330160G10Rik|D7Wsu87e
18958	mouse, laboratory	10090	Zswim5	74464	MGI:1921714	Chr4 cM	Chr4:-(+)	zinc finger SWIM-type containing 5	4933426E21Rik|mKIAA1511

## Sheet: CONS_CHICK_m6A_3UTR
Supplementary Data S1
The list of chicken conserved genes between mouse and chicken with m6A modification within the 3'UTR
To find conserved methylated transcripts between chicken and mouse we downloaded the complete gene list of all vertebrate homologues from MGI (http://www.informatics.jax.org/homology.shtml) and the peak files for mouse embryoid bodies from Geula et al.10 from REPIC (https://repicmod.uchicago.edu/repic)
HomoloGene ID	Common Organism Name	NCBI Taxon ID	Symbol	EntrezGene ID	Genetic Location	Name	Synonyms
41	chicken	9031	BRCA2	374139	Chr1	BRCA2, DNA repair associated
136	chicken	9031	GJA1	395278	Chr3	gap junction protein alpha 1	connexin-43|CX43
256	chicken	9031	PLOD1	419485	Chr21	procollagen-lysine, 2-oxoglutarate 5-dioxygenase 1	PLOD|procollagen-lysine
359	chicken	9031	IFNGR1	421685	Chr3	interferon gamma receptor 1
400	chicken	9031	BARD1	424010	Chr7	BRCA1 associated RING domain 1
402	chicken	9031	TWIST1	395491	Chr2	twist family bHLH transcription factor 1
524	chicken	9031	IFNAR1	395665	Chr1	interferon alpha and beta receptor subunit 1
578	chicken	9031	CACNA1D	395895	Chr12	calcium voltage-gated channel subunit alpha1 D
579	chicken	9031	CACNA2D1	768444	Chr1	calcium voltage-gated channel auxiliary subunit alpha2delta 1
676	chicken	9031	IGF2R	395817	Chr3	insulin like growth factor 2 receptor
828	chicken	9031	TNFRSF1A	418325	Chr1	TNF receptor superfamily member 1A
907	chicken	9031	ARHGAP5	428883	Chr5	Rho GTPase activating protein 5
994	chicken	9031	CNGA3	396144	Chr1	cyclic nucleotide gated channel alpha 3
1015	chicken	9031	CTBP1	422904	Chr4	C-terminal binding protein 1
1017	chicken	9031	CTNND1	428852	Chr5	catenin delta 1
1060	chicken	9031	DPH2	424574	Chr8	DPH2 homolog
1065	chicken	9031	DUSP4	395642	Chr4	dual specificity phosphatase 4	MKP-2
1072	chicken	9031	LPAR1	427339	ChrZ	lysophosphatidic acid receptor 1	EDG2
1080	chicken	9031	EIF2B1	100857736	Chr15	eukaryotic translation initiation factor 2B subunit alpha
1103	chicken	9031	EXTL3	422022	Chr3	exostosin like glycosyltransferase 3
1117	chicken	9031	FOXJ1	770009	Chr18	forkhead box J1
1182	chicken	9031	IGSF3	418451	Chr1	immunoglobulin superfamily member 3
1207	chicken	9031	IRAK2	416118	Chr12	interleukin 1 receptor associated kinase 2
1250	chicken	9031	ARCN1	770561	Chr24	archain 1
1265	chicken	9031	ATF3	421369	Chr3	activating transcription factor 3
1287	chicken	9031	ADGRB1	100859755	Chr2	adhesion G protein-coupled receptor B1	BAI1
1328	chicken	9031	CARS	423086	Chr5	cysteinyl-tRNA synthetase	CARS1
1335	chicken	9031	CCNF	416749	Chr14	cyclin F
1355	chicken	9031	CDC25A	420375	Chr2	cell division cycle 25A
1392	chicken	9031	COL6A2	396292	Chr7	collagen type VI alpha 2 chain	colVIA2
1399	chicken	9031	SLC31A1	417268	Chr17	solute carrier family 31 member 1
1492	chicken	9031	ELK4	419832	Chr26	ELK4, ETS transcription factor
1527	chicken	9031	FOXO1	374231	Chr1	forkhead box O1	FOXO1A
1542	chicken	9031	GAB1	422456	Chr4	GRB2 associated binding protein 1
1551	chicken	9031	GATA4	396392	Chr3	GATA binding protein 4	GATA-4
1632	chicken	9031	ID2	395852	Chr3	inhibitor of DNA binding 2, HLH protein
1645	chicken	9031	IL6ST	395684	ChrZ	interleukin 6 signal transducer	GP130
1671	chicken	9031	ITPKA	395694	Chr5	inositol-trisphosphate 3-kinase A	IP3KA
1677	chicken	9031	JAG2	776138	Chr5	jagged canonical Notch ligand 2
1724	chicken	9031	LAMC1	424442	Chr8	laminin subunit gamma 1
1735	chicken	9031	LIFR	395262	ChrZ	LIF receptor subunit alpha
1742	chicken	9031	LOXL2	419533	Chr22	lysyl oxidase like 2
1747	chicken	9031	LRP6	419097	Chr1	LDL receptor related protein 6
1788	chicken	9031	MBP	396217	Chr2	myelin basic protein
1793	chicken	9031	MDM2	395609	Chr1	MDM2 proto-oncogene
1808	chicken	9031	MGAT5	424286	Chr7	alpha-1,6-mannosylglycoprotein 6-beta-N-acetylglucosaminyltransferase
1824	chicken	9031	MPG	416648	Chr14	N-methylpurine DNA glycosylase
1837	chicken	9031	MSX2	395245	Chr13	msh homeobox 2	HOX-8|Msx-2
1839	chicken	9031	NUDT1	416467	Chr14	nudix hydrolase 1
1870	chicken	9031	NEO1	395822	Chr10	neogenin 1
1932	chicken	9031	PAFAH1B2	419765	Chr24	platelet activating factor acetylhydrolase 1b catalytic subunit 2
1994	chicken	9031	PLAGL2	100859766	Chr20	PLAG1 like zinc finger 2
2199	chicken	9031	RNF2	424452	Chr8	ring finger protein 2
2218	chicken	9031	RREB1	395920	Chr2	ras responsive element binding protein 1	RREB-1
2220	chicken	9031	RXRA	417143	Chr17	retinoid X receptor alpha
2230	chicken	9031	SALL1	395446	Chr11	spalt like transcription factor 1	SAL1|Spalt
2232	chicken	9031	SATB1	420647	Chr2	SATB homeobox 1
2252	chicken	9031	SDC1	421960	Chr3	syndecan 1
2266	chicken	9031	SFRP1	395237	Chr22	secreted frizzled related protein 1	CSFRP1
2386	chicken	9031	SUPV3L1	423697	Chr6	Suv3 like RNA helicase
2395	chicken	9031	ADAM17	421931	Chr3	ADAM metallopeptidase domain 17	TACE
2436	chicken	9031	TGFBR3	374251	Chr8	transforming growth factor beta receptor 3
2534	chicken	9031	VEGFA	395909	Chr3	vascular endothelial growth factor A
2560	chicken	9031	ZBTB14	396070	Chr2	zinc finger and BTB domain containing 14
2597	chicken	9031	CUL5	418969	Chr1	cullin 5
2606	chicken	9031	NRIP1	427966	Chr1	nuclear receptor interacting protein 1
2614	chicken	9031	AXIN1	395786	Chr14	axin 1	AXIN|axin-1|AXIN1-RGS
2660	chicken	9031	CUL4B	422364	Chr4	cullin 4B
2694	chicken	9031	ENC1	427203	ChrZ	ectodermal-neural cortex 1
2753	chicken	9031	STC2	416208	Chr13	stanniocalcin 2
2754	chicken	9031	USO1	422575	Chr4	USO1 vesicle transport factor
2773	chicken	9031	KCNK5	421424	Chr3	potassium two pore domain channel subfamily K member 5
2804	chicken	9031	B4GALT2	396122	Chr8	beta-1,4-galactosyltransferase 2	CKII
2808	chicken	9031	MBTPS1	415704	Chr11	membrane bound transcription factor peptidase, site 1
2820	chicken	9031	RIPK1	378921	Chr2	receptor interacting serine/threonine kinase 1	RIP-1
2826	chicken	9031	ADAM23	424099	Chr7	ADAM metallopeptidase domain 23
2875	chicken	9031	NRP2	374157	Chr7	neuropilin 2	neuropilin-2
2895	chicken	9031	ARHGEF7	418761	Chr1	Rho guanine nucleotide exchange factor 7
2944	chicken	9031	RNF8	421435	Chr3	ring finger protein 8
2971	chicken	9031	NFKB1	396033	Chr4	nuclear factor kappa B subunit 1	NF-KB1
3034	chicken	9031	FEN1	769677	Chr5	flap structure-specific endonuclease 1	FEN-1
3058	chicken	9031	MYO9B	420135	Chr28	myosin IXB
3137	chicken	9031	SLC9A3R1	422108	Chr18	SLC9A3 regulator 1	EBP50|NHERF-1
3141	chicken	9031	TGFBRAP1	418724	Chr1	transforming growth factor beta receptor associated protein 1
3153	chicken	9031	MED7	100857575	Chr13	mediator complex subunit 7
3162	chicken	9031	BAG3	423931	Chr6	BCL2 associated athanogene 3
3191	chicken	9031	BCL9	418456	Chr1	BCL9 transcription coactivator
3223	chicken	9031	CREB1	395099	Chr7	cAMP responsive element binding protein 1
3234	chicken	9031	DAG1	100049058	Chr12	dystroglycan 1
3238	chicken	9031	DDX6	419783	Chr24	DEAD-box helicase 6	RCK
3259	chicken	9031	E4F1	416560	Chr14	E4F transcription factor 1
3284	chicken	9031	FGF10	395432	ChrZ	fibroblast growth factor 10	FGF
3297	chicken	9031	GALNT2	421540	Chr3	polypeptide N-acetylgalactosaminyltransferase 2
3363	chicken	9031	PKNOX1	418542	Chr1	PBX/knotted 1 homeobox 1
3401	chicken	9031	XPC	416039	Chr12	XPC complex subunit, DNA damage recognition and repair factor
3419	chicken	9031	KDM5A	418148	Chr1	lysine (K)-specific demethylase 5A	JARID1A|Jumonji|SMCY
3426	chicken	9031	CDC23	771857	Chr13	cell division cycle 23
3442	chicken	9031	MTA1	429060	Chr8	metastasis associated 1
3444	chicken	9031	ATP6V0D1	415674	Chr11	ATPase H+ transporting V0 subunit d1
3451	chicken	9031	RABEP1	395930	Chr19	rabaptin, RAB GTPase binding effector protein 1
3486	chicken	9031	DLG5	423728	Chr6	discs large MAGUK scaffold protein 5
3506	chicken	9031	B4GALT6	421092	Chr2	beta-1,4-galactosyltransferase 6
3507	chicken	9031	B4GALT5	419358	Chr20	beta-1,4-galactosyltransferase 5
3516	chicken	9031	SLIT2	373967	Chr4	slit guidance ligand 2	Slit
3517	chicken	9031	UBE4A	419758	Chr24	ubiquitination factor E4A
3541	chicken	9031	TJP2	395751	ChrZ	tight junction protein 2
3542	chicken	9031	DDX23	100858001	Chr33	DEAD-box helicase 23
3557	chicken	9031	EIF2AK3	422930	Chr4	eukaryotic translation initiation factor 2 alpha kinase 3
3566	chicken	9031	ATG5	421784	Chr3	autophagy related 5	APG5L
3570	chicken	9031	PIGB	100858627	Chr10	phosphatidylinositol glycan anchor biosynthesis class B
3577	chicken	9031	TBPL1	395517	Chr3	TATA-box binding protein like 1
3680	chicken	9031	PCYT1A	424915	Chr9	phosphate cytidylyltransferase 1, choline, alpha
3686	chicken	9031	PIK3CD	419444	Chr21	phosphatidylinositol-4,5-bisphosphate 3-kinase catalytic subunit delta
3733	chicken	9031	CBFA2T2	419155	Chr20	CBFA2/RUNX1 partner transcriptional co-repressor 2	MTGR1
3783	chicken	9031	ABL1	417181	Chr17	ABL proto-oncogene 1, non-receptor tyrosine kinase	ABL
3797	chicken	9031	BMI1	493647	Chr2	BMI1 proto-oncogene, polycomb ring finger
3801	chicken	9031	RUNX1T1	395503	Chr2	RUNX1 translocation partner 1	CBFA2T1|MTG8
3829	chicken	9031	S1PR3	431264	ChrZ	sphingosine-1-phosphate receptor 3	EDG3
3836	chicken	9031	ERCC4	416420	Chr14	ERCC excision repair 4, endonuclease catalytic subunit	XPF
3838	chicken	9031	ETS2	396250	Chr1	ETS proto-oncogene 2, transcription factor	c-ets-2
3841	chicken	9031	FGF3	396267	Chr5	fibroblast growth factor 3	INT-2
3882	chicken	9031	GRB10	420948	Chr2	growth factor receptor bound protein 10
3921	chicken	9031	MYCL	428231	Chr23	v-myc avian myelocytomatosis viral oncogene lung carcinoma derived homolog	MYCL1|MYCLP1
3948	chicken	9031	SKIL	396087	Chr9	SKI like proto-oncogene	c-sno|SNO
3959	chicken	9031	TP53BP2	421329	Chr3	tumor protein p53 binding protein 2
3960	chicken	9031	TP73	419382	Chr21	tumor protein p73
3971	chicken	9031	EOMES	428443	Chr2	eomesodermin
3973	chicken	9031	CNOT9	424215	Chr7	CCR4-NOT transcription complex subunit 9	RQCD1
3979	chicken	9031	NOG	373912	Chr18	noggin
4002	chicken	9031	PIGK	424556	Chr8	phosphatidylinositol glycan anchor biosynthesis class K
4046	chicken	9031	INPP5D	424745	Chr9	inositol polyphosphate-5-phosphatase D
4117	chicken	9031	SOS1	431192	Chr3	SOS Ras/Rac guanine nucleotide exchange factor 1
4128	chicken	9031	TBL1X	426045	Chr1	transducin beta like 1X-linked
4135	chicken	9031	KLF10	420255	Chr2	Kruppel-like factor 10
4146	chicken	9031	RNF103	422919	Chr4	ring finger protein 103
4159	chicken	9031	SOX13	419820	Chr26	SRY-box 13
4169	chicken	9031	TSSC4	423092	Chr5	tumor suppressing subtransferable candidate 4
4193	chicken	9031	ARL4C	424026	Chr7	ADP ribosylation factor like GTPase 4C
4222	chicken	9031	LHFPL2	416369	ChrZ	lipoma HMGIC fusion partner-like 2
4279	chicken	9031	PURA	430546	Chr13	purine rich element binding protein A	PURB
4283	chicken	9031	NET1	416693	Chr1	neuroepithelial cell transforming 1
4310	chicken	9031	CAPRIN1	426151	Chr5	cell cycle associated protein 1	caprin-1|GPIAP1|M11S1
4317	chicken	9031	MANBA	422712	Chr4	mannosidase beta
4333	chicken	9031	MFAP3	416261	Chr13	microfibrillar associated protein 3
4340	chicken	9031	AFF1	422590	Chr4	AF4/FMR2 family member 1
4347	chicken	9031	MTF1	428218	Chr23	metal regulatory transcription factor 1
4352	chicken	9031	NAB1	374126	Chr7	NGFI-A binding protein 1
4371	chicken	9031	TBX3	374202	Chr15	T-box 3
4393	chicken	9031	ALKBH1	428898	Chr5	alkB homolog 1, histone H2A dioxygenase	ALKBH
4433	chicken	9031	CITED2	395399	Chr3	Cbp/p300 interacting transactivator with Glu/Asp rich carboxy-terminal domain 2
4442	chicken	9031	DLC1	422740	Chr4	DLC1 Rho GTPase activating protein
4452	chicken	9031	YAP1	396171	Chr1	Yes associated protein 1
4461	chicken	9031	TAB1	418014	Chr1	TGF-beta activated kinase 1 (MAP3K7) binding protein 1
4468	chicken	9031	DAGLA	426017	Chr5	diacylglycerol lipase alpha
4475	chicken	9031	SFN	408037	Chr23	stratifin
4492	chicken	9031	NFRKB	419730	Chr24	nuclear factor related to kappaB binding protein
4512	chicken	9031	ORC2	424077	Chr7	origin recognition complex subunit 2	ORC2L
4578	chicken	9031	TFDP2	424780	Chr9	transcription factor Dp-2
4633	chicken	9031	TADA3	416050	Chr12	transcriptional adaptor 3
4645	chicken	9031	LRRC41	424612	Chr8	leucine rich repeat containing 41
4697	chicken	9031	NPC2	423353	Chr5	NPC intracellular cholesterol transporter 2
4716	chicken	9031	ERLIN1	423670	Chr6	ER lipid raft associated 1	erlin-1|SPFH1
4740	chicken	9031	HIC1	396164	Chr19	HIC ZBTB transcriptional repressor 1
4756	chicken	9031	WNT6	395235	Chr7	Wnt family member 6
4762	chicken	9031	ELL	420124	Chr28	elongation factor for RNA polymerase II
4797	chicken	9031	B3GNT2	421286	Chr3	UDP-GlcNAc:betaGal beta-1,3-N-acetylglucosaminyltransferase 2	B3GNT1
4800	chicken	9031	FUT9	771133	Chr3	fucosyltransferase 9	CFUC-TIX
4846	chicken	9031	FRS2	417845	Chr1	fibroblast growth factor receptor substrate 2
4847	chicken	9031	NEU3	430542	Chr1	neuraminidase 3
4926	chicken	9031	BRAP	772041	Chr15	BRCA1 associated protein
4940	chicken	9031	RALBP1	429466	Chr2	ralA binding protein 1
5001	chicken	9031	RAB31	430750	Chr2	RAB31, member RAS oncogene family
5006	chicken	9031	ELF2	422439	Chr4	E74 like ETS transcription factor 2
5037	chicken	9031	PRKDC	395376	Chr2	protein kinase, DNA-activated, catalytic polypeptide	dnapkcs|DNA-PKCS
5062	chicken	9031	HSPA13	418469	Chr1	heat shock protein family A (Hsp70) member 13	STCH
5064	chicken	9031	TAF5	423872	Chr6	TATA-box binding protein associated factor 5
5129	chicken	9031	PWP1	418066	Chr1	PWP1 homolog, endonuclein
5139	chicken	9031	FICD	416889	Chr15	FIC domain containing
5174	chicken	9031	PCGF2	425919	Chr27	polycomb group ring finger 2
5190	chicken	9031	NUP50	418240	Chr1	nucleoporin 50
5215	chicken	9031	DUSP10	421340	Chr3	dual specificity phosphatase 10
5223	chicken	9031	RNF24	100857605	Chr4	ring finger protein 24
5257	chicken	9031	GPN1	421980	Chr3	GPN-loop GTPase 1	XAB1
5296	chicken	9031	MAK16	426924	Chr22	MAK16 homolog	RBM13
5672	chicken	9031	ZNF598	416549	Chr14	zinc finger protein 598
5673	chicken	9031	WARS2	418312	Chr1	tryptophanyl tRNA synthetase 2, mitochondrial
5874	chicken	9031	IPO9	421167	Chr26	importin 9
5907	chicken	9031	MRM2	416466	Chr14	mitochondrial rRNA methyltransferase 2	FTSJ2
5917	chicken	9031	LSG1	424897	Chr9	large 60S subunit nuclear export GTPase 1
5952	chicken	9031	EEF1AKMT1	418951	Chr1	eukaryotic translation elongation factor 1 alpha lysine methyltransferase 1	N6AMT2
5984	chicken	9031	PES1	770808	Chr15	pescadillo ribosomal biogenesis factor 1
6030	chicken	9031	ALG10	426734	Chr1	ALG10, alpha-1,2-glucosyltransferase	ALG10B|KCR1
6092	chicken	9031	DDX47	417959	Chr1	DEAD-box helicase 47
6100	chicken	9031	PPTC7	416869	Chr15	PTC7 protein phosphatase homolog	9130017A15RIK
6221	chicken	9031	VPS35	415750	Chr11	VPS35 retromer complex component
6323	chicken	9031	PRKRIP1	417508	Chr19	PRKR interacting protein 1 (IL11 inducible)
6460	chicken	9031	CPSF2	423416	Chr5	cleavage and polyadenylation specific factor 2
6474	chicken	9031	ABCB10	421537	Chr3	ATP binding cassette subfamily B member 10
6574	chicken	9031	ERGIC2	417697	Chr1	ERGIC and golgi 2
6747	chicken	9031	MRPL46	415499	Chr10	mitochondrial ribosomal protein L46
6804	chicken	9031	ING3	417762	Chr1	inhibitor of growth family member 3
6891	chicken	9031	NAA25	416883	Chr15	N(alpha)-acetyltransferase 25, NatB auxiliary subunit	C12orf30
7065	chicken	9031	BMS1	423633	Chr6	BMS1, ribosome biogenesis factor	BMS1L
7105	chicken	9031	ELP3	422021	Chr3	elongator acetyltransferase complex subunit 3
7155	chicken	9031	COG4	415681	Chr11	component of oligomeric golgi complex 4
7248	chicken	9031	BIRC6	421463	Chr3	baculoviral IAP repeat containing 6
7262	chicken	9031	CDR2	416621	Chr14	cerebellar degeneration related protein 2
7293	chicken	9031	DNAJC1	420508	Chr2	DnaJ heat shock protein family (Hsp40) member C1
7303	chicken	9031	ELF1	418828	Chr1	E74 like ETS transcription factor 1
7314	chicken	9031	PTK2	396416	Chr2	protein tyrosine kinase 2	FAK|FRNK|p125FAK
7317	chicken	9031	SH3PXD2A	423876	Chr6	SH3 and PX domains 2A	SH3MD1
7318	chicken	9031	FOXM1	430534	Chr1	forkhead box M1
7413	chicken	9031	MCL1	395674	Chr25	BCL2 family apoptosis regulator
7428	chicken	9031	MAST2	424606	Chr8	microtubule associated serine/threonine kinase 2
7511	chicken	9031	RBPJ	422802	Chr4	recombination signal binding protein for immunoglobulin kappa J region	RBPJk
7533	chicken	9031	GLG1	396492	Chr11	golgi glycoprotein 1	CFR
7539	chicken	9031	ST3GAL3	424572	Chr8	ST3 beta-galactoside alpha-2,3-sialyltransferase 3
7617	chicken	9031	ADNP	419350	Chr20	activity dependent neuroprotector homeobox
7621	chicken	9031	AGTRAP	419491	Chr21	angiotensin II receptor associated protein
7630	chicken	9031	ARHGAP6	418642	Chr1	Rho GTPase activating protein 6
7661	chicken	9031	NOCT	404779	Chr4	nocturnin	CCRN4L|MNOC|NOC
7684	chicken	9031	ASAP1	428385	Chr2	ArfGAP with SH3 domain, ankyrin repeat and PH domain 1	DDEF1
7713	chicken	9031	FEM1A	420157	Chr28	fem-1 homolog A
7714	chicken	9031	FEM1B	415559	Chr10	fem-1 homolog B
7720	chicken	9031	FKBP8	420123	Chr28	FK506 binding protein 8
7721	chicken	9031	AKTIP	415720	Chr11	AKT interacting protein	FTS
7723	chicken	9031	GABPB1	415453	Chr10	GA binding protein transcription factor beta subunit 1	GABPB2
7756	chicken	9031	HEY1	428365	Chr2	hes related family bHLH transcription factor with YRPW motif 1
7762	chicken	9031	FOXA2	395539	Chr3	forkhead box A2	HNF-3BETA
7778	chicken	9031	IER5	101750986	Chr8	immediate early response 5
7810	chicken	9031	LARGE1	418062	Chr1	LARGE xylosyl- and glucuronyltransferase 1	LARGE
7842	chicken	9031	MNT	427840	Chr19	MAX network transcriptional repressor
7847	chicken	9031	SIK1	395417	Chr1	salt inducible kinase 1	SIK2|SNF1LK
7859	chicken	9031	NCOA1	422016	Chr3	nuclear receptor coactivator 1
7865	chicken	9031	NOTCH2	374031	Chr8	notch 2
7889	chicken	9031	PIK3R1	427171	ChrZ	phosphoinositide-3-kinase regulatory subunit 1
7908	chicken	9031	PTGFRN	418449	Chr1	prostaglandin F2 receptor inhibitor
7970	chicken	9031	UBTF	100859792	Chr27	upstream binding transcription factor, RNA polymerase I
7980	chicken	9031	DEDD	425378	Chr25	death effector domain containing
8003	chicken	9031	ZNF148	424259	Chr7	zinc finger protein 148
8017	chicken	9031	DMTF1	418646	Chr1	cyclin D binding myb like transcription factor 1
8022	chicken	9031	GREM1	395826	Chr5	gremlin 1, DAN family BMP antagonist	Drm
8025	chicken	9031	HS2ST1	395140	Chr8	heparan sulfate 2-O-sulfotransferase 1	CHS2ST
8056	chicken	9031	MAP3K1	427144	ChrZ	mitogen-activated protein kinase kinase kinase 1
8057	chicken	9031	NUBP2	416402	Chr14	nucleotide binding protein 2
8096	chicken	9031	ADAT1	415886	Chr11	adenosine deaminase, tRNA specific 1
8101	chicken	9031	RERE	419435	Chr21	arginine-glutamic acid dipeptide repeats
8126	chicken	9031	EPB41L1	419117	Chr20	erythrocyte membrane protein band 4.1 like 1
8131	chicken	9031	FBXW2	417088	Chr17	F-box and WD repeat domain containing 2
8147	chicken	9031	GTF3C4	417167	Chr17	general transcription factor IIIC subunit 4
8200	chicken	9031	PLA2G15	768530	Chr11	phospholipase A2 group XV	LYPLA3
8226	chicken	9031	TTC33	427184	ChrZ	tetratricopeptide repeat domain 33
8228	chicken	9031	GMEB2	419264	Chr20	glucocorticoid modulatory element binding protein 2
8235	chicken	9031	PRDM4	418065	Chr1	PR/SET domain 4
8291	chicken	9031	FLRT2	428901	Chr5	fibronectin leucine rich transmembrane protein 2
8325	chicken	9031	RBM15B	770664	Chr12	RNA binding motif protein 15B	ARMET|MANF
8336	chicken	9031	UBIAD1	419456	Chr21	UbiA prenyltransferase domain containing 1
8374	chicken	9031	USP25	418471	Chr1	ubiquitin specific peptidase 25
8428	chicken	9031	SEMA6B	428330	Chr28	semaphorin 6B	semaphorin-6B
8443	chicken	9031	AZI2	420660	Chr2	5-azacytidine induced 2
8453	chicken	9031	PALD1	373898	Chr6	phosphatase domain containing, paladin 1	PALD
8462	chicken	9031	PTDSS2	422997	Chr5	phosphatidylserine synthase 2	PSS-2
8466	chicken	9031	NAGPA	416395	Chr14	N-acetylglucosamine-1-phosphodiester alpha-N-acetylglucosaminidase
8481	chicken	9031	TNFRSF19	418943	Chr1	TNF receptor superfamily member 19
8493	chicken	9031	ZNF292	421828	Chr3	zinc finger protein 292
8496	chicken	9031	FBXW5	417289	Chr17	F-box and WD repeat domain containing 5
8514	chicken	9031	ZBTB43	417091	Chr17	zinc finger and BTB domain containing 43
8548	chicken	9031	COMMD5	422376	Chr4	COMM domain containing 5
8562	chicken	9031	WDR91	417939	Chr1	WD repeat domain 91
8581	chicken	9031	LGALSL	421278	Chr3	galectin like	GRP|HSPC159
8610	chicken	9031	ADAMTS15	419733	Chr24	ADAM metallopeptidase with thrombospondin type 1 motif, 15
8612	chicken	9031	OLFM1	395535	Chr17	olfactomedin 1	NOELIN-1|olfactomedin-1
8633	chicken	9031	LEMD3	417832	Chr1	LEM domain containing 3
8676	chicken	9031	TAF5L	421538	Chr3	TATA-box binding protein associated factor 5 like
8683	chicken	9031	AFF4	416337	Chr13	AF4/FMR2 family member 4
8708	chicken	9031	SMPDL3B	769013	Chr23	sphingomyelin phosphodiesterase acid like 3B
8742	chicken	9031	HUNK	418493	Chr1	hormonally up-regulated Neu-associated kinase
8759	chicken	9031	ZNF592	415335	Chr10	zinc finger protein 592
8790	chicken	9031	CEP57	418993	Chr1	centrosomal protein 57	3110002L15RIK
8803	chicken	9031	RAB11FIP4	427808	Chr18	RAB11 family interacting protein 4
8814	chicken	9031	CLSTN1	395372	Chr21	calsyntenin 1	CALSYNTENIN-1
8834	chicken	9031	TBC1D5	420646	Chr2	TBC1 domain family member 5
8843	chicken	9031	SERTAD2	421276	Chr3	SERTA domain containing 2
8859	chicken	9031	URB2	421539	Chr3	URB2 ribosome biogenesis 2 homolog (S. cerevisiae)
8860	chicken	9031	TSC22D2	100859827	Chr9	TSC22 domain family member 2
8863	chicken	9031	RGP1	431658	ChrZ	RGP1 homolog, RAB6A GEF complex partner 1
8871	chicken	9031	PLEKHM1	419939	Chr27	pleckstrin homology and RUN domain containing M1	pleckhm1
8879	chicken	9031	CEP350	424417	Chr8	centrosomal protein 350
8882	chicken	9031	LRIG2	100857856	Chr26	leucine rich repeats and immunoglobulin like domains 2
8888	chicken	9031	ZC3H11A	421172	Chr26	zinc finger CCCH-type containing 11A
8896	chicken	9031	NUAK1	418074	Chr1	NUAK family kinase 1
8909	chicken	9031	FAM20B	424427	Chr8	FAM20B, glycosaminoglycan xylosylkinase
8928	chicken	9031	SCAF8	421647	Chr3	SR-related CTD associated factor 8	RBM16
8935	chicken	9031	DLGAP4	419119	Chr20	discs, large (Drosophila) homolog-associated protein 4
8942	chicken	9031	ZNF507	415764	Chr11	zinc finger protein 507
8967	chicken	9031	ANKRD6	421813	Chr3	ankyrin repeat domain 6
8991	chicken	9031	RAB21	771383	Chr1	RAB21, member RAS oncogene family
8995	chicken	9031	TMCC1	416125	Chr12	transmembrane and coiled-coil domain family 1
8997	chicken	9031	WDTC1	419581	Chr23	WD and tetratricopeptide repeats 1
9000	chicken	9031	ZHX3	419176	Chr20	zinc fingers and homeoboxes 3
9019	chicken	9031	TAB2	421622	Chr3	TGF-beta activated kinase 1/MAP3K7 binding protein 2
9020	chicken	9031	HIC2	416768	Chr15	hypermethylated in cancer 2
9022	chicken	9031	POGZ	429985	Chr25	pogo transposable element with ZNF domain
9032	chicken	9031	CLCC1	424343	Chr8	chloride channel CLIC like 1
9046	chicken	9031	JMJD6	417355	Chr18	arginine demethylase and lysine hydroxylase	PTDSR
9050	chicken	9031	FBXO28	421328	Chr3	F-box protein 28
9088	chicken	9031	ARHGEF12	419752	Chr24	Rho guanine nucleotide exchange factor 12
9089	chicken	9031	LARP1	416258	Chr13	La ribonucleoprotein domain family member 1	3110040D16RIK
9098	chicken	9031	ASXL1	428158	Chr20	additional sex combs like 1, transcriptional regulator
9103	chicken	9031	LRRC8B	424516	Chr8	leucine rich repeat containing 8 family member B
9108	chicken	9031	R3HDM1	424292	Chr7	R3H domain containing 1
9111	chicken	9031	BCL2L13	418163	Chr1	BCL2 like 13
9127	chicken	9031	NEPRO	418364	Chr1	nucleolus and neural progenitor protein	C1H3orf17|C3orf17
9140	chicken	9031	KANSL1	419961	Chr27	KAT8 regulatory NSL complex subunit 1
9155	chicken	9031	GEMIN5	416254	Chr13	gem nuclear organelle associated protein 5
9170	chicken	9031	AAR2	419118	Chr20	AAR2 splicing factor homolog	C20H20ORF4|C20orf4
9174	chicken	9031	HINFP	419756	Chr24	histone H4 transcription factor	MIZF
9196	chicken	9031	SENP6	421859	Chr3	SUMO1/sentrin specific peptidase 6
9213	chicken	9031	SZRD1	419462	Chr21	SUZ RNA binding domain containing 1
9218	chicken	9031	WSB1	395685	Chr19	WD repeat and SOCS box containing 1
9224	chicken	9031	TRPC4AP	428134	Chr20	transient receptor potential cation channel subfamily C member 4 associated protein
9233	chicken	9031	MTG2	419226	Chr20	mitochondrial ribosome associated GTPase 2	GTPBP5
9301	chicken	9031	TXNDC11	416428	Chr14	thioredoxin domain containing 11
9343	chicken	9031	TFB1M	428608	Chr3	transcription factor B1, mitochondrial
9428	chicken	9031	DBR1	429118	Chr9	debranching RNA lariats 1
9435	chicken	9031	GPRC5B	101747453	Chr14	G protein-coupled receptor class C group 5 member B
9447	chicken	9031	TOB2	417992	Chr1	transducer of ERBB2, 2
9448	chicken	9031	PLEKHO1	426108	Chr25	pleckstrin homology domain containing O1
9560	chicken	9031	TM7SF3	418215	Chr1	transmembrane 7 superfamily member 3
9582	chicken	9031	ZDHHC3	420705	Chr2	zinc finger DHHC-type containing 3
9635	chicken	9031	BANP	415834	Chr11	BTG3 associated nuclear protein
9675	chicken	9031	OGT	422203	Chr4	O-linked N-acetylglucosamine (GlcNAc) transferase
9694	chicken	9031	POLE3	417275	Chr17	DNA polymerase epsilon 3, accessory subunit
9728	chicken	9031	ZRANB1	423953	Chr6	zinc finger RANBP2-type containing 1
9730	chicken	9031	UBE2Q1	100858564	Chr25	ubiquitin conjugating enzyme E2 Q1
9741	chicken	9031	RNF111	374021	Chr10	ring finger protein 111	ARK
9749	chicken	9031	DNAJB12	423707	Chr6	DnaJ heat shock protein family (Hsp40) member B12
9761	chicken	9031	CNNM2	428975	Chr6	cyclin and CBS domain divalent metal cation transport mediator 2
9766	chicken	9031	GATAD2A	420109	Chr28	GATA zinc finger domain containing 2A
9768	chicken	9031	ANKRD10	418760	Chr1	ankyrin repeat domain 10
9789	chicken	9031	WDR55	100858589	Chr13	WD repeat domain 55
9793	chicken	9031	PGPEP1	420127	Chr28	pyroglutamyl-peptidase I
9816	chicken	9031	UHRF1BP1	419900	Chr26	UHRF1 binding protein 1
9822	chicken	9031	MTMR10	415382	Chr10	myotubularin related protein 10
9837	chicken	9031	SPDL1	416172	Chr13	spindle apparatus coiled-coil protein 1
9839	chicken	9031	WBP1L	423867	Chr6	WW domain binding protein 1-like
9924	chicken	9031	PID1	424787	Chr9	phosphotyrosine interaction domain containing 1	NYGGF4
9929	chicken	9031	USP47	423032	Chr5	ubiquitin specific peptidase 47
9933	chicken	9031	CUEDC1	417665	Chr19	CUE domain containing 1
9976	chicken	9031	GPATCH2	421355	Chr3	G-patch domain containing 2	GPATC2
9984	chicken	9031	ARHGAP17	416564	Chr14	Rho GTPase activating protein 17
10034	chicken	9031	LINS1	430374	Chr10	lines homolog 1	LINS
10039	chicken	9031	SLC25A36	424817	Chr9	solute carrier family 25 member 36
10051	chicken	9031	ATF7IP	417966	Chr1	activating transcription factor 7 interacting protein
10102	chicken	9031	ASXL2	421993	Chr3	additional sex combs like 2, transcriptional regulator
10104	chicken	9031	MRGBP	419233	Chr20	MRG domain binding protein	C20H20orf20|C20ORF20|Eaf7|MRG15BP|URCC4
10127	chicken	9031	BRF2	426772	Chr22	BRF2 RNA polymerase III transcription initiation factor subunit
10198	chicken	9031	PAG1	420195	Chr2	phosphoprotein membrane anchor with glycosphingolipid microdomains 1
10211	chicken	9031	ITFG2	418262	Chr1	integrin alpha FG-GAP repeat containing 2
10225	chicken	9031	ASH1L	425064	Chr25	ASH1 like histone lysine methyltransferase
10231	chicken	9031	NCBP3	417552	Chr19	nuclear cap binding subunit 3	C17orf85|C19H17ORF85|ELG|HSA277841
10270	chicken	9031	FAM114A2	416262	Chr13	family with sequence similarity 114 member A2	C5orf3
10293	chicken	9031	BET1L	422985	Chr5	Bet1 golgi vesicular membrane trafficking protein like
10340	chicken	9031	CLN8	421902	Chr3	ceroid-lipofuscinosis, neuronal 8
10344	chicken	9031	ERRFI1	419364	Chr21	ERBB receptor feedback inhibitor 1
10358	chicken	9031	DNAJC10	424115	Chr7	DnaJ heat shock protein family (Hsp40) member C10
10360	chicken	9031	SH3TC1	422867	Chr4	SH3 domain and tetratricopeptide repeats 1
10380	chicken	9031	TBC1D16	768712	Chr18	TBC1 domain family member 16
10403	chicken	9031	MTMR12	427423	ChrZ	myotubularin related protein 12	PIP3AP
10447	chicken	9031	TMEM37	770956	Chr7	transmembrane protein 37
10472	chicken	9031	MTFR1L	419586	Chr23	mitochondrial fission regulator 1 like	FAM54B|HYST1888|MST116|MSTP116
10477	chicken	9031	KIAA1217	420501	Chr2	KIAA1217
10489	chicken	9031	PARD3	420468	Chr2	par-3 family cell polarity regulator
10512	chicken	9031	ANAPC7	416838	Chr15	anaphase promoting complex subunit 7
10522	chicken	9031	EIF4ENIF1	416961	Chr15	eukaryotic translation initiation factor 4E nuclear import factor 1
10558	chicken	9031	PHAX	427124	ChrZ	phosphorylated adaptor for RNA export	RNUXA
10591	chicken	9031	AGPAT3	418550	Chr1	1-acylglycerol-3-phosphate O-acyltransferase 3
10592	chicken	9031	WRNIP1	395089	Chr2	Werner helicase interacting protein 1
10599	chicken	9031	C1GALT1	420575	Chr2	core 1 synthase, glycoprotein-N-acetylgalactosamine 3-beta-galactosyltransferase 1
10604	chicken	9031	NCLN	426048	Chr28	nicalin
10624	chicken	9031	OTUD7B	426041	Chr25	OTU deubiquitinase 7B
10634	chicken	9031	BBX	418407	Chr1	BBX, HMG-box containing
10647	chicken	9031	GMEB1	769918	Chr23	glucocorticoid modulatory element binding protein 1
10663	chicken	9031	DOLPP1	417196	Chr17	dolichyldiphosphatase 1
10667	chicken	9031	ZMIZ1	423724	Chr6	zinc finger MIZ-type containing 1
10670	chicken	9031	NKIRAS1	420654	Chr2	NFKB inhibitor interacting Ras like 1
10706	chicken	9031	SCYL3	424396	Chr8	SCY1 like pseudokinase 3	1200016D23RIK
10755	chicken	9031	ANGPTL4	769087	Chr28	angiopoietin like 4
10772	chicken	9031	RIPK4	418529	Chr1	receptor interacting serine/threonine kinase 4
10774	chicken	9031	TWSG1	374024	Chr2	twisted gastrulation BMP signaling modulator 1
10799	chicken	9031	ZBTB21	427986	Chr1	zinc finger and BTB domain containing 21
10808	chicken	9031	NUFIP2	417582	Chr19	NUFIP2, FMR1 interacting protein 2
10821	chicken	9031	PREX1	419210	Chr20	phosphatidylinositol-3,4,5-trisphosphate dependent Rac exchange factor 1
10829	chicken	9031	BEGAIN	428909	Chr5	brain enriched guanylate kinase associated
10833	chicken	9031	ISLR2	429941	Chr10	immunoglobulin superfamily containing leucine rich repeat 2	SST273
10841	chicken	9031	PHF12	417580	Chr19	PHD finger protein 12
10854	chicken	9031	CACHD1	424693	Chr8	cache domain containing 1
10858	chicken	9031	USP37	424216	Chr7	ubiquitin specific peptidase 37
10955	chicken	9031	JMY	427182	ChrZ	junction mediating and regulatory protein, p53 cofactor
10988	chicken	9031	SH3RF1	422434	Chr4	SH3 domain containing ring finger 1	SH3MD2
11059	chicken	9031	QKI	374204	Chr3	QKI, KH domain containing RNA binding
11101	chicken	9031	SDF2L1	416770	Chr15	stromal cell derived factor 2 like 1
11103	chicken	9031	DEF6	419893	Chr26	DEF6, guanine nucleotide exchange factor
11116	chicken	9031	HEATR6	417661	Chr19	HEAT repeat containing 6
11134	chicken	9031	PCIF1	771963	Chr20	PDX1 C-terminal inhibiting factor 1	C20orf67
11214	chicken	9031	PIM1	100858838	Chr26	Pim-1 proto-oncogene, serine/threonine kinase
11254	chicken	9031	CEP85	419547	Chr23	centrosomal protein 85	CCDC21
11275	chicken	9031	RFX7	431530	Chr10	regulatory factor X7	RFXDC2
11276	chicken	9031	CDCP1	420703	Chr2	CUB domain containing protein 1
11280	chicken	9031	IREB2	427490	Chr10	iron responsive element binding protein 2
11288	chicken	9031	CCDC71	100858691	Chr12	coiled-coil domain containing 71
11306	chicken	9031	JMJD4	420400	Chr2	jumonji domain containing 4
11319	chicken	9031	UBE2Z	419991	Chr27	ubiquitin conjugating enzyme E2 Z
11332	chicken	9031	SLC30A7	424464	Chr8	solute carrier family 30 member 7	ZNT7
11338	chicken	9031	JAM3	419736	Chr24	junctional adhesion molecule 3
11438	chicken	9031	CENPM	417982	Chr1	centromere protein M
11447	chicken	9031	KXD1	771070	Chr28	KxDL motif containing 1	C19ORF50|C28H19orf50|KXDL|MST096|MSTP096
11450	chicken	9031	KCTD15	415779	Chr11	potassium channel tetramerization domain containing 15
11482	chicken	9031	CCDC127	420970	Chr2	coiled-coil domain containing 127
11495	chicken	9031	KATNBL1	423287	Chr5	katanin regulatory subunit B1 like 1	C5H15ORF29
11516	chicken	9031	PLEKHF1	427546	Chr11	pleckstrin homology and FYVE domain containing 1
11576	chicken	9031	MUL1	426969	Chr21	mitochondrial E3 ubiquitin protein ligase 1	C1orf166
11588	chicken	9031	CCNJL	416155	Chr13	cyclin J-like
11595	chicken	9031	OGFRL1	421869	Chr3	opioid growth factor receptor like 1
11615	chicken	9031	PPP1R3B	422630	Chr4	protein phosphatase 1 regulatory subunit 3B
11632	chicken	9031	SAP30L	416259	Chr13	SAP30 like
11636	chicken	9031	MANEA	421807	Chr3	mannosidase endo-alpha
11648	chicken	9031	AAGAB	415553	Chr10	alpha- and gamma-adaptin binding protein
11674	chicken	9031	RABL6	417284	Chr17	RAB, member RAS oncogene family-like 6	C17H9orf86
11689	chicken	9031	CARF	424090	Chr7	calcium responsive transcription factor	ALS2CR8
11691	chicken	9031	HPS6	770328	Chr6	HPS6, biogenesis of lysosomal organelles complex 2 subunit 3
11698	chicken	9031	EHMT1	417250	Chr17	euchromatic histone lysine methyltransferase 1
11705	chicken	9031	CLMP	419747	Chr24	CXADR like membrane protein	ASAM
11739	chicken	9031	DENND1B	424351	Chr8	DENN domain containing 1B
11753	chicken	9031	PRR5L	423162	Chr5	proline rich 5 like
11793	chicken	9031	C10orf88	427084	Chr6	C10orf88 homolog	C6H10ORF88
11800	chicken	9031	FOXRED2	418054	Chr1	FAD dependent oxidoreductase domain containing 2
11823	chicken	9031	TOE1	424595	Chr8	target of EGR1, member 1 (nuclear)
11827	chicken	9031	EDC3	415294	Chr10	enhancer of mRNA decapping 3	LSM16
11832	chicken	9031	SPSB1	419441	Chr21	splA/ryanodine receptor domain and SOCS box containing 1
11844	chicken	9031	CHD9	415722	Chr11	chromodomain helicase DNA binding protein 9
11848	chicken	9031	CCDC92	416817	Chr15	coiled-coil domain containing 92
11866	chicken	9031	EDEM3	424450	Chr8	ER degradation enhancing alpha-mannosidase like protein 3
11900	chicken	9031	TMEM121	395216	Chr8	transmembrane protein 121
11907	chicken	9031	NATD1	416497	Chr14	N-acetyltransferase domain containing 1	C14H17ORF103|GTLF3B
11968	chicken	9031	C1orf52	424529	Chr8	C1orf52 homolog	C8H1orf52
11977	chicken	9031	ACOT11	429108	Chr8	acyl-CoA thioesterase 11
11984	chicken	9031	TCEANC2	424657	Chr8	transcription elongation factor A N-terminal and central domain containing 2
12063	chicken	9031	KCTD20	419814	Chr26	potassium channel tetramerization domain containing 20	C6orf69|dJ108K11.3
12065	chicken	9031	CEP19	424858	Chr9	centrosomal protein 19	C3orf34|C9H3orf34
12074	chicken	9031	CCDC43	419971	Chr27	coiled-coil domain containing 43
12089	chicken	9031	MTDH	101751823	Chr2	metadherin
12093	chicken	9031	ZMYND19	395088	Chr17	zinc finger MYND-type containing 19
12116	chicken	9031	RFFL	417529	Chr19	ring finger and FYVE like domain containing E3 ubiquitin protein ligase
12138	chicken	9031	IKBIP	417925	Chr1	IKBKB interacting protein	IKIP
12196	chicken	9031	DDX55	416820	Chr15	DEAD-box helicase 55
12215	chicken	9031	PRORSD1P	421212	Chr3	prolyl-tRNA synthetase associated domain containing 1, pseudogene	PRORSD1
12270	chicken	9031	MRPL53	420196	Chr2	mitochondrial ribosomal protein L53
12322	chicken	9031	SPSB3	416401	Chr14	splA/ryanodine receptor domain and SOCS box containing 3
12328	chicken	9031	TM2D2	426780	Chr22	TM2 domain containing 2
12392	chicken	9031	KCTD6	416067	Chr12	potassium channel tetramerization domain containing 6	KCTD11
12424	chicken	9031	RPUSD1	771031	Chr14	RNA pseudouridylate synthase domain containing 1
12433	chicken	9031	FBXO22	415355	Chr10	F-box protein 22
12464	chicken	9031	ZNF131	431588	ChrZ	zinc finger protein 131
12477	chicken	9031	MOB2	423097	Chr5	MOB kinase activator 2
12499	chicken	9031	DCBLD2	418379	Chr1	discoidin, CUB and LCCL domain containing 2
12506	chicken	9031	ZBTB8A	419661	Chr23	zinc finger and BTB domain containing 8A
12525	chicken	9031	GLYR1	426988	Chr14	glyoxylate reductase 1 homolog	N-PAC
12542	chicken	9031	STK40	395120	Chr23	serine/threonine kinase 40
12613	chicken	9031	PCDH1	416194	Chr13	protocadherin 1	protocadherin-1
12685	chicken	9031	LRRC42	424655	Chr8	leucine rich repeat containing 42
12725	chicken	9031	GLI2	395956	Chr7	GLI family zinc finger 2	GLI2/GLI4|GLI3
12755	chicken	9031	LACTB	415373	Chr10	lactamase beta
12825	chicken	9031	SLIRP	772054	Chr5	SRA stem-loop interacting RNA binding protein
12847	chicken	9031	ARID4B	425840	Chr3	AT-rich interaction domain 4B
12921	chicken	9031	NRG4	415354	Chr10	neuregulin 4
12924	chicken	9031	RNF26	769803	Chr24	ring finger protein 26
13007	chicken	9031	POLDIP3	417974	Chr1	DNA polymerase delta interacting protein 3
13043	chicken	9031	KBTBD8	416085	Chr12	kelch repeat and BTB domain containing 8
13048	chicken	9031	ZBTB37	429073	Chr8	zinc finger and BTB domain containing 37
13058	chicken	9031	DAB2IP	417117	Chr17	DAB2 interacting protein
13069	chicken	9031	KDM2B	416844	Chr15	lysine demethylase 2B	FBXL10
13112	chicken	9031	ADGRA2	426771	Chr22	adhesion G protein-coupled receptor A2	GPR124
13114	chicken	9031	ZC3H10	100858126	Chr33	zinc finger CCCH-type containing 10
13117	chicken	9031	ORAI1	416845	Chr15	ORAI calcium release-activated calcium modulator 1	orai-1|TMEM142A
13250	chicken	9031	B3GNT9	427539	Chr11	UDP-GlcNAc:betaGal beta-1,3-N-acetylglucosaminyltransferase 9	B3GNT4
13330	chicken	9031	PHOSPHO1	395650	Chr27	phosphoethanolamine/phosphocholine phosphatase
13349	chicken	9031	SCYL2	417930	Chr1	SCY1 like pseudokinase 2
13806	chicken	9031	RIC1	427226	ChrZ	RIC1 homolog, RAB6A GEF complex partner 1	KIAA1432
14084	chicken	9031	SENP8	415322	Chr10	SUMO/sentrin peptidase family member, NEDD8 specific
14121	chicken	9031	ARMC6	420112	Chr28	armadillo repeat containing 6
14130	chicken	9031	BMF	769140	Chr5	Bcl2 modifying factor
14180	chicken	9031	PCMTD1	421114	Chr2	protein-L-isoaspartate (D-aspartate) O-methyltransferase domain containing 1
14188	chicken	9031	WDFY2	770107	Chr1	WD repeat and FYVE domain containing 2
14427	chicken	9031	RNF145	416239	Chr13	ring finger protein 145
14584	chicken	9031	DENND5A	423048	Chr5	DENN domain containing 5A
14709	chicken	9031	UQCC1	419139	Chr20	ubiquinol-cytochrome c reductase complex assembly factor 1
14713	chicken	9031	FBXO45	770111	Chr9	F-box protein 45
14738	chicken	9031	GLYCTK	427577	Chr12	glycerate kinase
14805	chicken	9031	KLHL18	420406	Chr2	kelch like family member 18
14846	chicken	9031	CHCHD4	416037	Chr12	coiled-coil-helix-coiled-coil-helix domain containing 4
14879	chicken	9031	PDZD8	428984	Chr6	PDZ domain containing 8
14995	chicken	9031	BTBD9	421429	Chr3	BTB domain containing 9
15016	chicken	9031	PACS2	424375	Chr8	phosphofurin acidic cluster sorting protein 2
15031	chicken	9031	SEPSECS	422808	Chr4	Sep (O-phosphoserine) tRNA:Sec (selenocysteine) tRNA synthase
15037	chicken	9031	SLC39A14	429550	Chr22	solute carrier family 39 member 14
15267	chicken	9031	KLHDC10	427683	Chr1	kelch domain containing 10
15484	chicken	9031	UBTD2	416202	Chr13	ubiquitin domain containing 2
15522	chicken	9031	GGACT	418773	Chr1	gamma-glutamylamine cyclotransferase	A2LD1
15610	chicken	9031	SPECC1L	416950	Chr15	sperm antigen with calponin homology and coiled-coil domains 1 like
15668	chicken	9031	ZNRF2	420678	Chr2	zinc and ring finger 2
15773	chicken	9031	GLCCI1	420580	Chr2	glucocorticoid induced 1
15856	chicken	9031	CBLB	418406	Chr1	Cbl proto-oncogene B
15906	chicken	9031	SUDS3	427713	Chr15	SDS3 homolog, SIN3A corepressor complex component
16123	chicken	9031	EME1	422104	Chr18	essential meiotic structure-specific endonuclease 1
16155	chicken	9031	DCUN1D3	427002	Chr14	defective in cullin neddylation 1 domain containing 3
16234	chicken	9031	FBXO42	419461	Chr21	F-box protein 42
16403	chicken	9031	TSTD2	427380	ChrZ	thiosulfate sulfurtransferase like domain containing 2
16890	chicken	9031	MEX3D	420082	Chr28	mex-3 RNA binding family member D	RKHD1
16936	chicken	9031	SFXN5	422954	Chr4	sideroflexin 5
16989	chicken	9031	SMCR8	416519	Chr14	Smith-Magenis syndrome chromosome region, candidate 8
17049	chicken	9031	B3GNT7	424930	Chr9	UDP-GlcNAc:betaGal beta-1,3-N-acetylglucosaminyltransferase 7
17076	chicken	9031	UBXN2A	421973	Chr3	UBX domain protein 2A
17078	chicken	9031	SHISA2	395162	Chr1	shisa family member 2	SHISA|TMEM46
17084	chicken	9031	SBK1	426442	Chr14	SH3 domain binding kinase 1
17132	chicken	9031	PRR5	418237	Chr1	proline rich 5
17136	chicken	9031	LEMD2	419907	Chr26	LEM domain containing 2
17139	chicken	9031	CNST	421487	Chr3	consortin, connexin sorting protein	C1orf71
17140	chicken	9031	TOR4A	417257	Chr17	torsin family 4 member A
17525	chicken	9031	TPGS1	100857535	Chr28	tubulin polyglutamylase complex subunit 1
17535	chicken	9031	FAAP24	415770	Chr11	Fanconi anemia core complex associated protein 24	C11H19ORF40|C19orf40
17555	chicken	9031	SLC43A2	417557	Chr19	solute carrier family 43 member 2
17572	chicken	9031	C5orf24	416311	Chr13	C5orf24 homolog	C13H5orf24
17686	chicken	9031	PRICKLE1	417793	Chr1	prickle planar cell polarity protein 1
17734	chicken	9031	PRSS35	421839	Chr3	protease, serine 35
17822	chicken	9031	PHF13	101750144	Chr21	PHD finger protein 13
17953	chicken	9031	PPP4R2	416098	Chr12	protein phosphatase 4 regulatory subunit 2
17964	chicken	9031	LRP4	423189	Chr5	LDL receptor related protein 4
18151	chicken	9031	EVA1B	101749609	Chr23	eva-1 homolog B
18162	chicken	9031	JADE1	422502	Chr4	jade family PHD finger 1	PHF17
18195	chicken	9031	LARP4B	420457	Chr2	La ribonucleoprotein domain family member 4B	LARP5
18204	chicken	9031	AMBRA1	423194	Chr5	autophagy and beclin 1 regulator 1
18209	chicken	9031	MEGF9	100858115	Chr17	multiple EGF-like-domains 9	MEGF9L
18212	chicken	9031	LIN54	422595	Chr4	lin-54 DREAM MuvB core complex component
18259	chicken	9031	PEAK1	100857260	Chr10	pseudopodium enriched atypical kinase 1
18308	chicken	9031	VKORC1L1	408253	Chr19	vitamin K epoxide reductase complex subunit 1 like 1
18368	chicken	9031	C2CD2	418532	Chr1	C2 calcium dependent domain containing 2
18377	chicken	9031	LDLRAD3	423160	Chr5	low density lipoprotein receptor class A domain containing 3
18404	chicken	9031	MDFIC	417774	Chr1	MyoD family inhibitor domain containing
18407	chicken	9031	RPS19BP1	418011	Chr1	ribosomal protein S19 binding protein 1	S19BP
18451	chicken	9031	FAM78B	769830	Chr8	family with sequence similarity 78 member B
18529	chicken	9031	ZNF800	417747	Chr1	zinc finger protein 800
18660	chicken	9031	FAM53A	378905	Chr4	family with sequence similarity 53 member A	DNTNP
18736	chicken	9031	BRWD3	422281	Chr4	bromodomain and WD repeat domain containing 3
18822	chicken	9031	KMT2E	417712	Chr1	lysine methyltransferase 2E	MLL5
18897	chicken	9031	PLEKHG1	421632	Chr3	pleckstrin homology and RhoGEF domain containing G1
18923	chicken	9031	SECISBP2L	415435	Chr10	SECIS binding protein 2 like
18958	chicken	9031	ZSWIM5	424591	Chr8	zinc finger SWIM-type containing 5
18968	chicken	9031	RIMKLB	418255	Chr1	ribosomal modification protein rimK like family member B	NAAGS
19062	chicken	9031	YDJC	771088	Chr15	YdjC homolog (bacterial)
19067	chicken	9031	CHD7	421140	Chr2	chromodomain helicase DNA binding protein 7	CHD-7
19115	chicken	9031	ZNF518B	422841	Chr4	zinc finger protein 518B
19202	chicken	9031	CAMSAP1	417127	Chr17	calmodulin regulated spectrin associated protein 1
19378	chicken	9031	ZNF518A	428964	Chr6	zinc finger protein 518A
19382	chicken	9031	ZBTB34	417090	Chr17	zinc finger and BTB domain containing 34
19504	chicken	9031	USF3	418320	Chr1	upstream transcription factor family member 3
19511	chicken	9031	BEND3	421778	Chr3	BEN domain containing 3
19521	chicken	9031	FAM171A1	420528	Chr2	family with sequence similarity 171, member A1	C10orf38
19529	chicken	9031	ZBTB38	424783	Chr9	zinc finger and BTB domain containing 38
19600	chicken	9031	TMED8	423375	Chr5	transmembrane p24 trafficking protein family member 8
19618	chicken	9031	CENPL	426563	Chr8	centromere protein L
20386	chicken	9031	NDST1	416274	Chr13	N-deacetylase and N-sulfotransferase 1
20388	chicken	9031	ING2	422553	Chr4	inhibitor of growth family member 2
20391	chicken	9031	ACVR2A	396324	Chr7	activin A receptor type 2A
20477	chicken	9031	GPC1	424770	Chr9	glypican 1	glypican-1
20515	chicken	9031	KCNG1	419347	Chr20	potassium voltage-gated channel modifier subfamily G member 1
20520	chicken	9031	KPNA3	418870	Chr1	karyopherin subunit alpha 3
20549	chicken	9031	MMP15	415629	Chr11	matrix metallopeptidase 15
20581	chicken	9031	PIK3C2A	423070	Chr5	phosphatidylinositol-4-phosphate 3-kinase catalytic subunit type 2 alpha
20654	chicken	9031	SIAH1	374076	Chr11	siah E3 ubiquitin protein ligase 1
20711	chicken	9031	TULP3	426085	Chr1	tubby like protein 3
20718	chicken	9031	CLIP2	417488	Chr19	CAP-GLY domain containing linker protein 2
20750	chicken	9031	FZD1	374062	Chr2	frizzled class receptor 1	cFz-1|Fz-1
20751	chicken	9031	FZD7	374060	Chr7	frizzled class receptor 7	cFz-7|Fz-7
20847	chicken	9031	TRIO	420919	Chr2	trio Rho guanine nucleotide exchange factor
20911	chicken	9031	BMPR1A	396308	Chr6	bone morphogenetic protein receptor type 1A	ALK-3|BMPR-1|BRK-1
20933	chicken	9031	EPHA4	395559	Chr9	EPH receptor A4
20938	chicken	9031	EPHB3	396179	Chr9	EPH receptor B3	CEK10|EK10
20970	chicken	9031	WNT11	395562	Chr1	Wnt family member 11
20979	chicken	9031	PIAS2	416383	ChrZ	protein inhibitor of activated STAT 2
20984	chicken	9031	SLC16A6	417435	Chr18	solute carrier family 16 member 6
20994	chicken	9031	DHRS3	419480	Chr21	dehydrogenase/reductase 3
21002	chicken	9031	MED1	420004	Chr27	mediator complex subunit 1	PPARBP
21010	chicken	9031	ROCK2	374182	Chr3	Rho associated coiled-coil containing protein kinase 2
21013	chicken	9031	CHST10	395206	Chr1	carbohydrate sulfotransferase 10
21027	chicken	9031	CDH6	414842	Chr2	cadherin 6	cadherin-6|cadherin-6B|c-cad6B
21072	chicken	9031	GRK3	416904	Chr15	G protein-coupled receptor kinase 3	ADRBK2
21074	chicken	9031	RND3	424312	Chr7	Rho family GTPase 3
21085	chicken	9031	ETV3	426718	Chr25	ETS variant 3	ERF
21087	chicken	9031	F2RL1	427213	ChrZ	F2R like trypsin receptor 1
21120	chicken	9031	SRC	396442	Chr20	SRC proto-oncogene, non-receptor tyrosine kinase
21196	chicken	9031	SMAD1	395680	Chr4	SMAD family member 1
21249	chicken	9031	PIK3CA	424971	Chr9	phosphatidylinositol-4,5-bisphosphate 3-kinase catalytic subunit alpha	C-P3K
21267	chicken	9031	TLN1	395194	ChrZ	talin 1
21282	chicken	9031	SEMA4D	396331	ChrZ	semaphorin 4D	COLL-4|semaphorin-4D
21322	chicken	9031	HSPH1	418917	Chr1	heat shock protein family H (Hsp110) member 1
21331	chicken	9031	MMP24	419141	Chr20	matrix metallopeptidase 24
21361	chicken	9031	RAB35	416983	Chr15	RAB35, member RAS oncogene family
21366	chicken	9031	ZFHX3	395682	Chr11	zinc finger homeobox 3
21371	chicken	9031	MYO9A	101748321	Chr10	myosin IXA
21408	chicken	9031	ABCF2	426038	Chr2	ATP binding cassette subfamily F member 2
21416	chicken	9031	KLHL2	422422	Chr4	kelch like family member 2
21610	chicken	9031	SPTLC2	423379	Chr5	serine palmitoyltransferase long chain base subunit 2
22219	chicken	9031	EIF1B	420715	Chr2	eukaryotic translation initiation factor 1B
22370	chicken	9031	RRP12	423845	Chr6	ribosomal RNA processing 12 homolog
22472	chicken	9031	KPNA6	419656	Chr23	karyopherin subunit alpha 6
22519	chicken	9031	TNFAIP1	417672	Chr19	TNF alpha induced protein 1
22531	chicken	9031	WNT7B	427937	Chr1	Wnt family member 7B
22574	chicken	9031	GNAZ	770226	Chr15	G protein subunit alpha z
22589	chicken	9031	KIF13A	420832	Chr2	kinesin family member 13A
22651	chicken	9031	BAZ1B	427819	Chr19	bromodomain adjacent to zinc finger domain 1B
22673	chicken	9031	TENM3	422557	Chr4	teneurin transmembrane protein 3
22704	chicken	9031	RHOQ	395114	Chr3	ras homolog family member Q	CHTC10
22712	chicken	9031	ADGRL2	424545	Chr8	adhesion G protein-coupled receptor L2	LPHN2
22725	chicken	9031	YWHAG	427820	Chr19	tyrosine 3-monooxygenase/tryptophan 5-monooxygenase activation protein gamma
22790	chicken	9031	MAPK8IP3	426986	Chr14	mitogen-activated protein kinase 8 interacting protein 3
22815	chicken	9031	RAB30	419020	Chr1	RAB30, member RAS oncogene family
22837	chicken	9031	STARD8	768976	Chr4	StAR related lipid transfer domain containing 8
22855	chicken	9031	WDFY3	422613	Chr4	WD repeat and FYVE domain containing 3
22861	chicken	9031	TRAK2	424082	Chr7	trafficking kinesin protein 2
22862	chicken	9031	CDK19	421756	Chr3	cyclin dependent kinase 19	CDC2L6
22873	chicken	9031	RHOBTB2	419536	Chr22	Rho-related BTB domain containing 2
22875	chicken	9031	SIK2	768557	Chr24	salt inducible kinase 2	SNF1LK2
22882	chicken	9031	TRIM2	100857562	Chr4	tripartite motif containing 2
22907	chicken	9031	AUTS2	417481	Chr19	activator of transcription and developmental regulator AUTS2
22953	chicken	9031	PIAS1	427514	Chr10	protein inhibitor of activated STAT 1
22991	chicken	9031	HNRNPU	421492	Chr3	heterogeneous nuclear ribonucleoprotein U	HNRPU
23089	chicken	9031	ARHGAP12	420473	Chr2	Rho GTPase activating protein 12
23106	chicken	9031	ECHDC1	769021	Chr3	ethylmalonyl-CoA decarboxylase 1	MMCD
23132	chicken	9031	SLC38A2	417807	Chr1	solute carrier family 38 member 2
23137	chicken	9031	TNRC6C	417348	Chr18	trinucleotide repeat containing 6C
23186	chicken	9031	MBNL1	425033	Chr9	muscleblind like splicing regulator 1
23246	chicken	9031	ABHD6	416009	Chr12	abhydrolase domain containing 6
23251	chicken	9031	NCEH1	429158	Chr9	neutral cholesterol ester hydrolase 1	AADACL1
23302	chicken	9031	PARD6B	419352	Chr20	par-6 family cell polarity regulator beta	PAR-6|PAR-6B
23317	chicken	9031	KLHL12	101748977	Chr26	kelch like family member 12	C3IP1|DKIR
23320	chicken	9031	RGS19	374070	Chr20	regulator of G-protein signaling 19	GAIP
23349	chicken	9031	XYLT2	414780	Chr18	xylosyltransferase 2
23383	chicken	9031	RBM15	100859595	Chr26	RNA binding motif protein 15
23411	chicken	9031	SSBP3	395250	Chr8	single stranded DNA binding protein 3
23421	chicken	9031	RALGPS2	424429	Chr8	Ral GEF with PH domain and SH3 binding motif 2	RALGPS1
23634	chicken	9031	CERS5	426879	Chr33	ceramide synthase 5	LASS5
23717	chicken	9031	TSPAN14	423624	Chr6	tetraspanin 14
23770	chicken	9031	SLX4	416665	Chr14	SLX4 structure-specific endonuclease subunit homolog	BTBD12
24678	chicken	9031	PIK3R4	428449	Chr2	phosphoinositide-3-kinase regulatory subunit 4
24919	chicken	9031	SPRED1	423292	Chr5	sprouty related EVH1 domain containing 1
25103	chicken	9031	TRAK1	420714	Chr2	trafficking kinesin protein 1
25256	chicken	9031	MED13L	417027	Chr15	mediator complex subunit 13L	THRAP2
25260	chicken	9031	TOR2A	417224	Chr17	torsin family 2 member A
26430	chicken	9031	EHD4	100859860	Chr5	EH domain containing 4
26431	chicken	9031	MAGI3	419877	Chr26	membrane associated guanylate kinase, WW and PDZ domain containing 3	MAGI-3
26615	chicken	9031	SHROOM4	777072	Chr4	shroom family member 4
27040	chicken	9031	SGMS1	378907	Chr6	sphingomyelin synthase 1	MOB|TMEM23
27085	chicken	9031	C5orf51	427191	ChrZ	C5orf51 homolog	CZH5ORF51
27773	chicken	9031	KDM4B	428354	Chr28	lysine demethylase 4B	JMJD2B
27795	chicken	9031	ZBTB41	424353	Chr8	zinc finger and BTB domain containing 41
27827	chicken	9031	NFATC3	415711	Chr11	nuclear factor of activated T-cells 3
27867	chicken	9031	C3orf38	418429	Chr1	C3orf38 homolog	C1H3ORF38
27907	chicken	9031	AGRN	396538	Chr21	agrin	HSPG
27952	chicken	9031	SH3PXD2B	427625	Chr13	SH3 and PX domains 2B
30950	chicken	9031	APC	415607	ChrZ	APC, WNT signaling pathway regulator	APC1|CTC-554D6.1
30952	chicken	9031	ATM	395401	Chr1	ATM serine/threonine kinase
30980	chicken	9031	RFX2	420092	Chr28	regulatory factor X2
30997	chicken	9031	IGF1R	395889	Chr10	insulin like growth factor 1 receptor	IGF-1R
31015	chicken	9031	ACACA	396504	Chr19	acetyl-CoA carboxylase alpha	ACAC
31039	chicken	9031	FOXO3	421769	Chr3	forkhead box O3
31092	chicken	9031	MYC	420332	Chr2	v-myc avian myelocytomatosis viral oncogene homolog	c-myc
31121	chicken	9031	SDC4	419184	Chr20	syndecan 4	syndecan-4
31122	chicken	9031	SGTA	426396	Chr28	small glutamine rich tetratricopeptide repeat containing alpha
31137	chicken	9031	TAF2	428389	Chr2	TATA-box binding protein associated factor 2
31142	chicken	9031	THBS1	373987	Chr5	thrombospondin 1
31144	chicken	9031	TMPO	417923	Chr1	thymopoietin
31150	chicken	9031	UVRAG	419091	Chr1	UV radiation resistance associated
31152	chicken	9031	WEE1	423045	Chr5	WEE1 G2 checkpoint kinase
31166	chicken	9031	CDC7	424507	Chr8	cell division cycle 7
31228	chicken	9031	PIGQ	770171	Chr14	phosphatidylinositol glycan anchor biosynthesis class Q
31276	chicken	9031	ZFP36L1	101751828	Chr5	ZFP36 ring finger protein like 1
31288	chicken	9031	OXSR1	420421	Chr2	oxidative stress responsive 1	OSR1
31289	chicken	9031	THRAP3	419623	Chr23	thyroid hormone receptor associated protein 3
31358	chicken	9031	SEMA3A	395825	Chr1	semaphorin 3A	COLL-1|semaphorin-3A
31361	chicken	9031	PDGFRA	395509	Chr4	platelet-derived growth factor receptor, alpha polypeptide	PDGFR|PDGFR-A
31370	chicken	9031	NCOR2	416815	Chr15	nuclear receptor corepressor 2
31406	chicken	9031	BTG2	419932	Chr26	BTG anti-proliferation factor 2
31683	chicken	9031	SHQ1	416096	Chr12	SHQ1, H/ACA ribonucleoprotein assembly factor
31761	chicken	9031	PIGO	101748924	ChrZ	phosphatidylinositol glycan anchor biosynthesis class O
31983	chicken	9031	MRS2	420820	Chr2	MRS2, magnesium transporter	MRS2L
32049	chicken	9031	NOTCH1	395655	Chr17	notch 1
32085	chicken	9031	RHBDF1	416647	Chr14	rhomboid 5 homolog 1
32155	chicken	9031	DNAJB9	417783	Chr1	DnaJ heat shock protein family (Hsp40) member B9
32246	chicken	9031	RCOR1	428911	Chr5	REST corepressor 1
32269	chicken	9031	RPAP1	423217	Chr5	RNA polymerase II associated protein 1
32301	chicken	9031	FAM8A1	771369	Chr2	family with sequence similarity 8 member A1
32345	chicken	9031	ZNF821	415878	Chr11	zinc finger protein 821
32351	chicken	9031	KMT5B	425119	Chr5	lysine methyltransferase 5B	CGI-85|SUV420H1
32380	chicken	9031	SLC30A6	421480	Chr3	solute carrier family 30 member 6	ZnT6
32386	chicken	9031	BSDC1	419658	Chr23	BSD domain containing 1
32399	chicken	9031	HMG20A	415346	Chr10	high mobility group 20A
32426	chicken	9031	SEMA6A	427387	ChrZ	semaphorin 6A
32428	chicken	9031	TMEM131	418689	Chr1	transmembrane protein 131
32574	chicken	9031	TBC1D20	771781	Chr20	TBC1 domain family member 20
32594	chicken	9031	TXNDC15	416310	Chr13	thioredoxin domain containing 15
32665	chicken	9031	FAM135A	421871	Chr3	family with sequence similarity 135 member A
32678	chicken	9031	TTL	416711	Chr3	tubulin tyrosine ligase
32684	chicken	9031	WDR20	423464	Chr5	WD repeat domain 20
32702	chicken	9031	PAQR8	422042	Chr3	progestin and adipoQ receptor family member 8
32718	chicken	9031	LCA5	421852	Chr3	LCA5, lebercilin
32720	chicken	9031	GLT8D1	415898	Chr12	glycosyltransferase 8 domain containing 1
32722	chicken	9031	SRXN1	100858692	Chr20	sulfiredoxin 1
32743	chicken	9031	CSRNP2	100859835	Chr33	cysteine and serine rich nuclear protein 2
32779	chicken	9031	DOT1L	420078	Chr28	DOT1 like histone lysine methyltransferase
33158	chicken	9031	PPM1L	429162	Chr9	protein phosphatase, Mg2+/Mn2+ dependent 1L
34130	chicken	9031	ASB7	415518	Chr10	ankyrin repeat and SOCS box containing 7
34134	chicken	9031	BMP2K	422578	Chr4	BMP2 inducible kinase
34139	chicken	9031	DIDO1	419234	Chr20	death inducer-obliterator 1	DATF1
34521	chicken	9031	USP53	422680	Chr4	ubiquitin specific peptidase 53
34653	chicken	9031	METTL16	431184	Chr1	methyltransferase like 16	METT10D
34695	chicken	9031	BMT2	417776	Chr1	base methyltransferase of 25S rRNA 2 homolog	C1H7ORF60
34714	chicken	9031	TRUB1	423914	Chr6	TruB pseudouridine synthase family member 1
34730	chicken	9031	KIAA0100	417573	Chr19	KIAA0100
34825	chicken	9031	ZBTB49	422847	Chr4	zinc finger and BTB domain containing 49
34981	chicken	9031	FAM210A	421045	Chr2	family with sequence similarity 210 member A	C18orf19|C2H18ORF19|HsT2329
34991	chicken	9031	YTHDF3	421145	Chr2	YTH N6-methyladenosine RNA binding protein 3
35136	chicken	9031	ARHGAP35	425730	Chr32	Rho GTPase activating protein 35	GRLF1
35321	chicken	9031	ATMIN	426138	Chr11	ATM interactor
35370	chicken	9031	OTUD4	422463	Chr4	OTU deubiquitinase 4
35374	chicken	9031	ANKRD28	420640	Chr2	ankyrin repeat domain 28
35472	chicken	9031	NUP98	430616	Chr1	nucleoporin 98
35507	chicken	9031	SPIRE1	421033	Chr2	spire type actin nucleation factor 1
36199	chicken	9031	NPEPPS	426231	Chr27	aminopeptidase puromycin sensitive
36371	chicken	9031	CTTNBP2NL	419870	Chr26	CTTNBP2 N-terminal like
36423	chicken	9031	ZNF750	101750712	Chr18	zinc finger protein 750
36427	chicken	9031	TRABD	417746	Chr1	TraB domain containing
36487	chicken	9031	PARD6G	428511	Chr2	par-6 family cell polarity regulator gamma
37263	chicken	9031	TOR1A	417190	Chr17	torsin family 1 member A
37271	chicken	9031	GUSB	427823	Chr19	glucuronidase beta	beta-glucuronidase
37462	chicken	9031	CHD2	415507	Chr10	chromodomain helicase DNA binding protein 2
37521	chicken	9031	BTG1	396295	Chr1	BTG anti-proliferation factor 1
37567	chicken	9031	GLUL	396489	Chr8	glutamate-ammonia ligase	p42
37570	chicken	9031	GRK6	416361	Chr13	G protein-coupled receptor kinase 6
37643	chicken	9031	PDPK1	416588	Chr14	3-phosphoinositide dependent protein kinase 1
37656	chicken	9031	PNN	423338	Chr5	pinin, desmosome associated protein
37658	chicken	9031	POU2F1	396463	Chr1	POU class 2 homeobox 1	chOCT-1|Oct-1
37788	chicken	9031	STAM	420517	Chr2	signal transducing adaptor molecule
37848	chicken	9031	B4GALT4	418341	Chr1	beta-1,4-galactosyltransferase 4
37851	chicken	9031	RNGTT	421819	Chr3	RNA guanylyltransferase and 5'-phosphatase
37900	chicken	9031	SLC16A3	395383	Chr18	solute carrier family 16 member 3	MCT4
37925	chicken	9031	EPHB2	396513	Chr21	EPH receptor B2
37933	chicken	9031	MLLT3	427234	ChrZ	MLLT3, super elongation complex subunit
37936	chicken	9031	PEX14	771421	Chr21	peroxisomal biogenesis factor 14
37957	chicken	9031	SCAF11	417805	Chr1	SR-related CTD-associated factor 11	SFRS2IP|SRSF2IP
37980	chicken	9031	MINPP1	395356	Chr6	multiple inositol-polyphosphate phosphatase 1	HIPER1
37995	chicken	9031	PIP4K2A	420504	Chr2	phosphatidylinositol-5-phosphate 4-kinase type 2 alpha	PIP5K2A
38021	chicken	9031	CRKL	416939	Chr15	CRK like proto-oncogene, adaptor protein
38043	chicken	9031	PDCL	772371	Chr17	phosducin like	phosducin-like
38062	chicken	9031	GTF2E1	418328	Chr1	general transcription factor IIE subunit 1
38080	chicken	9031	SS18	421085	Chr2	SS18, nBAF chromatin remodeling complex subunit
38096	chicken	9031	G3BP1	416265	Chr13	G3BP stress granule assembly factor 1
38122	chicken	9031	STK10	416204	Chr13	serine/threonine kinase 10
38195	chicken	9031	EXOC5	423549	Chr5	exocyst complex component 5	SEC10L1
38217	chicken	9031	BLCAP	100857695	Chr20	bladder cancer associated protein
38234	chicken	9031	IMMT	422912	Chr4	inner membrane mitochondrial protein
38286	chicken	9031	CEP250	419138	Chr20	centrosomal protein 250
38287	chicken	9031	WBP4	418829	Chr1	WW domain binding protein 4
38295	chicken	9031	PARK7	395277	Chr21	Parkinsonism associated deglycase	DJ-1
38743	chicken	9031	SETD6	101750922	Chr11	SET domain containing 6
39141	chicken	9031	RRAGC	419605	Chr23	Ras related GTP binding C
40661	chicken	9031	SUPT6H	425418	Chr19	SPT6 homolog, histone chaperone
40755	chicken	9031	NEFH	417020	Chr15	neurofilament heavy polypeptide
40799	chicken	9031	TPRA1	416028	Chr12	transmembrane protein adipocyte associated 1
40813	chicken	9031	TFIP11	416909	Chr15	tuftelin interacting protein 11
40915	chicken	9031	SPCS1	415899	Chr12	signal peptidase complex subunit 1
40953	chicken	9031	CNOT2	417851	Chr1	CCR4-NOT transcription complex subunit 2
40954	chicken	9031	MYBBP1A	417491	Chr19	MYB binding protein 1a
40978	chicken	9031	USP34	421193	Chr3	ubiquitin specific peptidase 34
40980	chicken	9031	SUSD6	423259	Chr5	sushi domain containing 6
40981	chicken	9031	JADE3	418674	Chr1	jade family PHD finger 3	PHF16
41015	chicken	9031	PRRC2C	424393	Chr8	proline rich coiled-coil 2C
41045	chicken	9031	TSKU	419088	Chr1	tsukushi, small leucine rich proteoglycan
41056	chicken	9031	TRUB2	417218	Chr17	TruB pseudouridine synthase family member 2
41076	chicken	9031	POP5	416973	Chr15	POP5 homolog, ribonuclease P/MRP subunit
41097	chicken	9031	YPEL5	421299	Chr3	yippee like 5
41102	chicken	9031	GOLT1B	418192	Chr1	golgi transport 1B
41174	chicken	9031	CHRAC1	100858071	Chr2	chromatin accessibility complex 1
41182	chicken	9031	CACFD1	417151	Chr17	calcium channel flower domain containing 1	C17H9ORF7|C9orf7|D9S2135|FLOWER
41185	chicken	9031	MBTD1	417387	Chr18	mbt domain containing 1
41193	chicken	9031	ZDHHC7	415821	Chr11	zinc finger DHHC-type containing 7
41279	chicken	9031	SLC35E3	417842	Chr1	solute carrier family 35 member E3
41282	chicken	9031	ERBIN	431583	ChrZ	erbb2 interacting protein	ERBB2IP
41308	chicken	9031	DDX49	420116	Chr28	DEAD-box helicase 49
41329	chicken	9031	ARHGEF3	416000	Chr12	Rho guanine nucleotide exchange factor 3
41430	chicken	9031	ZNF462	431622	ChrZ	zinc finger protein 462
41431	chicken	9031	PELI2	776013	Chr5	pellino E3 ubiquitin protein ligase family member 2
41443	chicken	9031	SCPEP1	417403	Chr18	serine carboxypeptidase 1
41457	chicken	9031	SLC22A23	420881	Chr2	solute carrier family 22 member 23	C6orf85
41473	chicken	9031	NRBF2	423656	Chr6	nuclear receptor binding factor 2	RBF-2
41477	chicken	9031	RBSN	416128	Chr12	rabenosyn, RAB effector	ZFYVE20
41483	chicken	9031	CHST8	769263	Chr11	carbohydrate sulfotransferase 8
41496	chicken	9031	GINS3	415625	Chr11	GINS complex subunit 3
41505	chicken	9031	NOL6	100858366	ChrZ	nucleolar protein 6
41515	chicken	9031	GNB1L	416781	Chr15	G protein subunit beta 1 like
41636	chicken	9031	ARRDC4	415509	Chr10	arrestin domain containing 4
41665	chicken	9031	MRPL10	426521	Chr27	mitochondrial ribosomal protein L10
41670	chicken	9031	SAMD8	428946	Chr6	sterile alpha motif domain containing 8
41738	chicken	9031	FUNDC1	418558	Chr1	FUN14 domain containing 1
41748	chicken	9031	SETD3	423445	Chr5	SET domain containing 3, actin histidine methyltransferase
41788	chicken	9031	PYM1	100858240	Chr33	PYM homolog 1, exon junction complex associated factor	WIBG
41822	chicken	9031	PLEKHA2	395435	Chr22	pleckstrin homology domain containing A2	TAPP2
41963	chicken	9031	PIGS	417571	Chr19	phosphatidylinositol glycan anchor biosynthesis class S
41967	chicken	9031	BTBD6	101752037	Chr5	BTB domain containing 6
42951	chicken	9031	WDR82	415942	Chr12	WD repeat domain 82
43132	chicken	9031	SNX21	419302	Chr20	sorting nexin family member 21
43135	chicken	9031	SYS1	419183	Chr20	SYS1, golgi trafficking protein
43997	chicken	9031	UNC119B	416970	Chr15	unc-119 lipid binding chaperone B
44220	chicken	9031	FBXL15	428951	Chr6	F-box and leucine rich repeat protein 15
44229	chicken	9031	HMGXB3	416278	Chr13	HMG-box containing 3	HMGX3
44230	chicken	9031	SLC39A3	429050	Chr28	solute carrier family 39 member 3
44428	chicken	9031	ARSI	427639	Chr13	arylsulfatase family member I
44445	chicken	9031	LRRC1	421891	Chr3	leucine rich repeat containing 1
44516	chicken	9031	GINS1	425297	Chr3	GINS complex subunit 1
44893	chicken	9031	MAPK1IP1L	423556	Chr5	mitogen-activated protein kinase 1 interacting protein 1-like	c14_5346|C14orf32|MISS
45113	chicken	9031	GORAB	770613	Chr8	golgin, RAB6 interacting	SCYL1BP1
45165	chicken	9031	SNX33	415309	Chr10	sorting nexin 33	SH3PX3
45211	chicken	9031	CMTM4	415794	Chr11	CKLF like MARVEL transmembrane domain containing 4	CKLFSF4
45414	chicken	9031	DNAJC16	429208	Chr21	DnaJ heat shock protein family (Hsp40) member C16
45564	chicken	9031	UBN2	417970	Chr1	ubinuclein 2
45585	chicken	9031	UBXN7	424856	Chr9	UBX domain protein 7
45622	chicken	9031	ZNF827	422465	Chr4	zinc finger protein 827
45669	chicken	9031	NAIF1	417229	Chr17	nuclear apoptosis inducing factor 1	C9orf90
45673	chicken	9031	CDPF1	418246	Chr1	cysteine rich DPF motif domain containing 1	C1H22ORF40
45715	chicken	9031	ARHGAP27	770740	Chr27	Rho GTPase activating protein 27
45842	chicken	9031	KLHL42	419046	Chr1	kelch like family member 42	KLHDC5
45872	chicken	9031	ARID5B	423661	Chr6	AT-rich interaction domain 5B
47510	chicken	9031	RNF169	419055	Chr1	ring finger protein 169
47588	chicken	9031	KIAA0895L	415660	Chr11	KIAA0895 like
48034	chicken	9031	ATP2B4	419934	Chr26	ATPase plasma membrane Ca2+ transporting 4
48068	chicken	9031	FYN	396294	Chr3	FYN proto-oncogene, Src family tyrosine kinase
48145	chicken	9031	RAF1	396245	Chr12	Raf-1 proto-oncogene, serine/threonine kinase
48364	chicken	9031	SGK1	395133	Chr3	serum/glucocorticoid regulated kinase 1	SGK
48437	chicken	9031	DYRK2	427864	Chr1	dual specificity tyrosine phosphorylation regulated kinase 2
48692	chicken	9031	CSNK1G1	415328	Chr10	casein kinase 1 gamma 1	CTD-2116N17.1
48881	chicken	9031	CTDSPL	408252	Chr2	CTD small phosphatase like	NFI1|NIF
49137	chicken	9031	DDX42	419959	Chr27	DEAD-box helicase 42
49395	chicken	9031	PPIP5K1	415587	Chr10	diphosphoinositol pentakisphosphate kinase 1	HISPPD2A
49396	chicken	9031	RAB11FIP3	100857269	Chr14	RAB11 family interacting protein 3
49413	chicken	9031	SZT2	424566	Chr8	seizure threshold 2 homolog (mouse)
49663	chicken	9031	RHOU	428589	Chr3	ras homolog family member U
49697	chicken	9031	FAM217B	419221	Chr20	family with sequence similarity 217 member B	C20H20ORF177|C20orf177
49713	chicken	9031	TNS3	420792	Chr2	tensin 3
49770	chicken	9031	TCTN1	416870	Chr15	tectonic family member 1
49916	chicken	9031	GORASP1	420426	Chr2	golgi reassembly stacking protein 1
49927	chicken	9031	MTIF3	418930	Chr1	mitochondrial translational initiation factor 3
50272	chicken	9031	ABHD17A	769919	Chr28	abhydrolase domain containing 17A	FAM108A1
50501	chicken	9031	RAPGEF1	417173	Chr17	Rap guanine nucleotide exchange factor 1
50955	chicken	9031	BRI3BP	416812	Chr15	BRI3 binding protein	BNAS1
51852	chicken	9031	AMER1	422314	Chr4	APC membrane recruitment protein 1	FAM123B
52330	chicken	9031	NAV2	422977	Chr5	neuron navigator 2
52626	chicken	9031	BEND4	422777	Chr4	BEN domain containing 4	CCDC4
52649	chicken	9031	TTC9	768624	Chr5	tetratricopeptide repeat domain 9
54768	chicken	9031	ZNF652	419987	Chr27	zinc finger protein 652
55434	chicken	9031	COL5A1	395568	Chr17	collagen type V alpha 1 chain	cha1V
55437	chicken	9031	FGFR3	396515	Chr4	fibroblast growth factor receptor 3
55454	chicken	9031	PITX2	395862	Chr4	paired like homeodomain 2	Ptx2
55576	chicken	9031	DYRK1A	395233	Chr1	dual specificity tyrosine phosphorylation regulated kinase 1A	MNB
55597	chicken	9031	ATP2B1	374244	Chr1	ATPase plasma membrane Ca2+ transporting 1
55649	chicken	9031	LYN	421127	Chr2	LYN proto-oncogene, Src family tyrosine kinase
55685	chicken	9031	MAPK9	395983	Chr13	mitogen-activated protein kinase 9	JNK2-ALPHA1
55742	chicken	9031	ZIC3	422251	Chr4	Zic family member 3
55765	chicken	9031	CDC42BPA	416746	Chr3	CDC42 binding protein kinase alpha
55770	chicken	9031	DEGS1	421327	Chr3	delta 4-desaturase, sphingolipid 1
55800	chicken	9031	FASN	396061	Chr18	fatty acid synthase
55831	chicken	9031	ROR2	769516	ChrZ	receptor tyrosine kinase like orphan receptor 2
55836	chicken	9031	MAPKAPK3	415917	Chr12	MAPK activated protein kinase 3
55900	chicken	9031	YES1	396238	Chr2	YES proto-oncogene 1, Src family tyrosine kinase
55930	chicken	9031	DCAF7	771554	Chr27	DDB1 and CUL4 associated factor 7	WDR68
55937	chicken	9031	SMAD3	395132	Chr10	SMAD family member 3
55946	chicken	9031	HDAC4	374207	Chr7	histone deacetylase 4
55976	chicken	9031	GNA13	417434	Chr18	G protein subunit alpha 13
56003	chicken	9031	RIT1	425068	Chr25	Ras like without CAAX 1
56033	chicken	9031	STK38	428260	Chr26	serine/threonine kinase 38
56299	chicken	9031	STK38L	418217	Chr1	serine/threonine kinase 38 like
56394	chicken	9031	EGR1	373931	Chr13	early growth response 1
56426	chicken	9031	PLXNA1	416030	Chr12	plexin A1	plexin-A1
56429	chicken	9031	PPP3CB	378890	Chr6	protein phosphatase 3 catalytic subunit beta
56537	chicken	9031	CORO1C	416893	Chr15	coronin 1C	coronin-1C
56557	chicken	9031	SNW1	423381	Chr5	SNW domain containing 1	SKIIP
56564	chicken	9031	KDM2A	425999	Chr5	lysine (K)-specific demethylase 2A	FBXL11
56584	chicken	9031	GPSM2	424342	Chr8	G protein signaling modulator 2
56594	chicken	9031	RORA	415377	Chr10	RAR related orphan receptor A	RORalpha1
56602	chicken	9031	IP6K1	100857294	Chr12	inositol hexakisphosphate kinase 1
56685	chicken	9031	ELMO1	420735	Chr2	engulfment and cell motility 1
56686	chicken	9031	SRGAP3	416115	Chr12	SLIT-ROBO Rho GTPase activating protein 3
56694	chicken	9031	TBC1D2B	415364	Chr10	TBC1 domain family member 2B
56721	chicken	9031	ZNF777	101750773	Chr2	zinc finger protein 777
56841	chicken	9031	EML4	771345	Chr3	EMAP like 4
56856	chicken	9031	TBC1D1	426162	Chr4	TBC1 domain family member 1
56868	chicken	9031	KIF21B	421178	Chr26	kinesin family member 21B
56929	chicken	9031	IP6K2	416010	Chr12	inositol hexakisphosphate kinase 2	IHPK2
56936	chicken	9031	EGLN1	768374	Chr3	egl-9 family hypoxia inducible factor 1
56941	chicken	9031	PRDM15	418531	Chr1	PR/SET domain 15
56949	chicken	9031	ATL2	100859117	Chr3	atlastin GTPase 2
56957	chicken	9031	USP46	422758	Chr4	ubiquitin specific peptidase 46
57086	chicken	9031	RRP1B	425237	Chr1	ribosomal RNA processing 1B
57098	chicken	9031	DPP8	427512	Chr10	dipeptidyl peptidase 8
62165	chicken	9031	SLC25A25	417230	Chr17	solute carrier family 25 member 25
62452	chicken	9031	LRIG3	417813	Chr1	leucine rich repeats and immunoglobulin like domains 3
64370	chicken	9031	ZNF704	420194	Chr2	zinc finger protein 704
64662	chicken	9031	CECR2	418161	Chr1	CECR2, histone acetyl-lysine reader
64680	chicken	9031	TANC2	419951	Chr27	tetratricopeptide repeat, ankyrin repeat and coiled-coil containing 2
65163	chicken	9031	RALGPS1	417089	Chr17	Ral GEF with PH domain and SH3 binding motif 1
65245	chicken	9031	NCOA7	421717	Chr3	nuclear receptor coactivator 7
66103	chicken	9031	OTUD3	426746	Chr21	OTU deubiquitinase 3
66194	chicken	9031	TNRC6B	418010	Chr1	trinucleotide repeat containing adaptor 6B
66195	chicken	9031	EFR3B	422012	Chr3	EFR3 homolog B
67120	chicken	9031	TICRR	415489	Chr10	TOPBP1 interacting checkpoint and replication regulator
68174	chicken	9031	CHD1Z	395783	ChrZ	chromodomain helicase DNA binding protein 1-Z	CHD1|CHDZ|CHD-Z
68298	chicken	9031	SOX2	396105	Chr9	SRY-box 2
68377	chicken	9031	RHOB	395734	Chr3	ras homolog family member B
68422	chicken	9031	WTAP	421588	Chr3	Wilms tumor 1 associated protein
68463	chicken	9031	HIP1	770683	Chr19	huntingtin interacting protein 1
68813	chicken	9031	OSBPL8	417866	Chr1	oxysterol binding protein like 8
69027	chicken	9031	NMT1	419966	Chr27	N-myristoyltransferase 1
69110	chicken	9031	MAP3K3	419954	Chr27	mitogen-activated protein kinase kinase kinase 3	1700012F10RIK
69134	chicken	9031	ANKRD11	415845	Chr11	ankyrin repeat domain 11
69180	chicken	9031	WWC1	416167	Chr13	WW and C2 domain containing 1
69182	chicken	9031	SASH1	421621	Chr3	SAM and SH3 domain containing 1
69237	chicken	9031	DYM	426843	ChrZ	dymeclin
69314	chicken	9031	ZNF512B	771616	Chr20	zinc finger protein 512B
69318	chicken	9031	ARRDC3	427107	ChrZ	arrestin domain containing 3
69382	chicken	9031	TBL1XR1	426284	Chr9	transducin beta like 1 X-linked receptor 1
69553	chicken	9031	CACTIN	420073	Chr28	cactin, spliceosome C complex subunit	C28H19orf29
70791	chicken	9031	YPEL2	417632	Chr19	yippee like 2
71030	chicken	9031	RAPH1	424107	Chr7	Ras association (RalGDS/AF-6) and pleckstrin homology domains 1	LPD
73872	chicken	9031	CLCN5	422285	Chr4	chloride voltage-gated channel 5
73876	chicken	9031	SLC26A2	427611	Chr13	solute carrier family 26 member 2
74540	chicken	9031	BRD2	417049	Chr16	bromodomain containing 2	RING3
74545	chicken	9031	EGFR	396494	Chr2	epidermal growth factor receptor	c-erbB
74739	chicken	9031	SLC25A37	419530	Chr22	solute carrier family 25 (mitochondrial iron transporter), member 37	HT015|MFRN|MFRN1|mitoferrin|mitoferrin-1|MSC|MSCP|PRO1278|PRO1584|PRO2217
74841	chicken	9031	CSNK1D	417378	Chr18	casein kinase 1 delta
74984	chicken	9031	SLC30A4	415444	Chr10	solute carrier family 30 member 4
75051	chicken	9031	HS6ST1	395141	Chr9	heparan sulfate 6-O-sulfotransferase 1	CHS6ST-1
75172	chicken	9031	CELF5	425867	Chr28	CUGBP Elav-like family member 5	BRUNOL5
75216	chicken	9031	TRIB1	428386	Chr2	tribbles pseudokinase 1
76214	chicken	9031	IPMK	101751177	Chr6	inositol polyphosphate multikinase
76377	chicken	9031	MAP3K9	425792	Chr5	mitogen-activated protein kinase kinase kinase 9
77409	chicken	9031	ZNF362	100859829	Chr21	zinc finger protein 362
77420	chicken	9031	APCDD1	426765	Chr2	APC down-regulated 1	cAPCDD1|Pgo1
80210	chicken	9031	RPTOR	428674	Chr18	regulatory associated protein of MTOR complex 1
81077	chicken	9031	GPR107	417186	Chr17	G protein-coupled receptor 107
81653	chicken	9031	PISD	416960	Chr15	phosphatidylserine decarboxylase
81710	chicken	9031	SNN	416429	Chr14	stannin
81737	chicken	9031	PPP4R1	425903	Chr2	protein phosphatase 4 regulatory subunit 1
81816	chicken	9031	MAFG	769355	Chr18	MAF bZIP transcription factor G
81850	chicken	9031	CRK	417553	Chr19	CRK proto-oncogene, adaptor protein
84588	chicken	9031	CHTF8	769609	Chr11	chromosome transmission fidelity factor 8
84591	chicken	9031	CREM	378903	Chr2	cAMP responsive element modulator	ICER
84697	chicken	9031	SHROOM2	418651	Chr1	shroom family member 2	APXL
84816	chicken	9031	NKRF	422370	Chr4	NFKB repressing factor
86351	chicken	9031	ATAD2B	421972	Chr3	ATPase family, AAA domain containing 2B
87074	chicken	9031	SMIM12	100858028	Chr23	small integral membrane protein 12
87862	chicken	9031	ISCA1	427463	ChrZ	iron-sulfur cluster assembly 1	HBLD2
89116	chicken	9031	CBX1	374237	Chr27	chromobox 1
90897	chicken	9031	SAR1A	423711	Chr6	secretion associated Ras related GTPase 1A
99835	chicken	9031	KIF1B	419449	Chr21	kinesin family member 1B
100530	chicken	9031	HK1	373889	Chr6	hexokinase 1	hexokinase-1
100934	chicken	9031	RAB8A	428352	Chr28	RAB8A, member RAS oncogene family
101101	chicken	9031	DDX17	418024	Chr1	DEAD-box helicase 17	Cp68
103894	chicken	9031	UBE2H	416678	Chr1	ubiquitin conjugating enzyme E2 H
104136	chicken	9031	PIAS4	420095	Chr28	protein inhibitor of activated STAT 4
106649	chicken	9031	PRRC2B	417177	Chr17	proline rich coiled-coil 2B	BAT2L
110648	chicken	9031	ACTB	396526	Chr14	actin, beta	actin|Bact
110886	chicken	9031	SNIP1	419616	Chr23	Smad nuclear interacting protein 1
110962	chicken	9031	SRPK1	421185	Chr26	SRSF protein kinase 1
117451	chicken	9031	FBXW7	422481	Chr4	F-box and WD repeat domain containing 7
117682	chicken	9031	WDR6	416060	Chr12	WD repeat domain 6
117703	chicken	9031	SYNJ2	421656	Chr3	synaptojanin 2
121858	chicken	9031	CAMK1D	425522	Chr1	calcium/calmodulin dependent protein kinase ID
124247	chicken	9031	ARID3A	100858440	Chr28	AT-rich interaction domain 3A
128413	chicken	9031	ZNF226L	430731	Chr16	zinc finger protein 226-like
129720	chicken	9031	PDK4	420570	Chr2	pyruvate dehydrogenase kinase 4
130508	chicken	9031	PLXNB3	100859325	Chr12	plexin B3	plexin-B1|PLXNB1
133552	chicken	9031	ERCC6	423785	Chr6	ERCC excision repair 6, chromatin remodeling factor	PGBD3
133862	chicken	9031	CDV3	420693	Chr2	CDV3 homolog
133981	chicken	9031	SURF6	417160	Chr17	surfeit 6
134095	chicken	9031	NSRP1	417588	Chr19	nuclear speckle splicing regulatory protein 1	CCDC55
134226	chicken	9031	XPR1	424415	Chr8	xenotropic and polytropic retrovirus receptor 1
134440	chicken	9031	DAZAP1	427266	Chr28	DAZ associated protein 1
134613	chicken	9031	EIF5B	395514	Chr1	eukaryotic translation initiation factor 5B	CIF2
135671	chicken	9031	RCOR3	421380	Chr3	REST corepressor 3
136161	chicken	9031	NISCH	415893	Chr12	nischarin
137244	chicken	9031	G3BP2	422576	Chr4	G3BP stress granule assembly factor 2
137386	chicken	9031	RBM33	420444	Chr2	RNA binding motif protein 33	PRR8
