# Supplementary material
Source: HighWire-hosted journal article supplement (doi:10.1101/rna.079615.123)
Supplement: Supplemental_Data_S3.docx [file Supplemental_Data_S3.docx]

**Data for the 2’-OTBS-Bz-m6A-CE phosphoramidite (1:1 mixture of diastereoisomers)**

δH (400 MHz, CDCl3) 8.47 (0.5H, s, H-2), 8.45 (0.5H, s, H-2), 8.16 (0.5H, s, H-8), 8.14 (0.5H, s, H-8), 7.51 – 7.40 (4H, m, Ar-H), 7.41 – 7.31 (4H, m, Ar-H), 7.33 – 7.19 (4H, m, Ar-H), 7.20 – 7.12 (2H, t, Ar-H), 6.87 – 6.78 (4H, m, Ar-H), 6.06 (0.5H, d, *J* 6.7 Hz, H-1’), 6.00 (0.5H, d, *J* 6.6 Hz, H-1’), 5.06 – 4.95 (1H, m, H-2’), 4.47 – 4.33 (2H, m, H-3’, H-4’), 4.02 – 3.86 (1H, m, CH2CH2CN), 3.85 – 3.75 (9H, m, NCH3, 2 x ArOCH3), 3.72 – 3.48 (4H, m, HA-5’, CH2CH2CN, CH(CH3)2), 3.36-3.28 (1H, m, HB-5′), 2.75 – 2.57, (1H, m, CH2CH2CN), 2.40 – 2.22, (1H, m, CH2CH2CN), 1.25 – 1.15 (9H, m, CH(CH3)2), 1.07 (3H, d, *J* 6.6 Hz, CH(CH3)2), 0.75 (9H, s, SiC(CH3)3), -0.04 (1.5H, s, Si(CH3)2), -0.07 (1.5H, s, Si(CH3)2), -0.29 (1.5H, s, Si(CH3)2), -0.30 (1.5H, s, Si(CH3)2).

δC (101 MHz, CDCl3) 172.1 (CO), 158.6 (ArC), 155.0 (C-6), 155.0 (C-6), 152.8 (C-4), 151.8 (C-2), 144.6 (ArC), 144.4(ArC), 142.5(CH-8), 142.5 (CH-8), 136.2 (ArC), 135.7 (ArC), 135.7(ArC), 135.5 (ArC), 135.5 (ArC), 130.5 (ArC), 130.2 (ArC), 130.1 (ArC), 130.1 (ArC), 130.0 (ArC), 128.7 (ArC), 128.2 (ArC), 128.1 (ArC), 127.9 (ArC), 127.9 (ArC), 127.9 (ArC), 127.0 (ArC), 126.8 (C-5), 126.7 (C-5), 117.6 (CN), 117.3 (CN), 113.2 (ArC), 113.2 (ArC), 88.1 (CH-1′), 87.9 (CH-1′), 86.8 (CAr3), 86.6 (CAr3), 84.4 (CH-4′), 84.04 (d, *J* 4.0 Hz, CH-4’), 75.07 (d, *J* 2.9 Hz, CH-2’), 74.40 (d, *J* 6.0 Hz, CH-2’), 73.46 (d, *J* 10.2 Hz, CH-3’), 72.65 (d, *J* 14.6 Hz, CH-3’) , 63.26 (CH2-5′), 63.12 (CH2-5′), 58.84 (d, *J* 16.8 Hz, CH2CH2CN), 57.56 (d, *J* 20.6 Hz, CH2CH2CN), 55.3 (ArOCH3), 55.2 (ArOCH3), 43.43 (d, *J* 13.1 Hz, CH(CH3)2), 42.95 (d, *J* 12.5 Hz, CH(CH3)2), 35.9 (NCH3), 25.6 (SiC(CH3)3), 25.6 (SiC(CH3)3), 24.8 (CH(CH3)2), 24.7 (CH(CH3)2), 24.6 (CH(CH3)2), 24.6 (CH(CH3)2), 20.46 (d, *J* 6.5 Hz, CH2CH2CN), 20.09 (d, *J* 7.0 Hz, CH2CH2CN), 17.9 (SiC(CH3)3), 17.8 (SiC(CH3)3), -4.6 (Si(CH3)2), -4.7 (Si(CH3)2), -5.2 (Si(CH3)2).

δP (162 MHz, CDCl3) 151.20, 149.02.

HRMS (ESI+) calculated for C54H70N7O8P1Si (M+H)+ 1002.4709, found 1002.4688.

**Data for the 2’-OTBS-Bz-m1A-CE phosphoramidite ((1:1 mixture of diastereoisomers).**

δH (400 MHz, CDCl3) 8.21 – 8.51 (2H, m, ArH), 7.87 (0.5H, s, H-8), 7.85 (0.5H, s, H-8), 7.84 (0.5H, s, H-2), 7.82 (0.5H, s, H-2), 7.54 – 7.39 (4H, m, ArH), 7.38 – 7.30 (4H, m, ArH), 7.30 – 7.13 (4H, m, ArH), 6.86 – 6.76 (4H, m, ArH), 5.93 (0.5H, d, *J* 6.1 Hz, H-1’), 5.86 (0.5H, d, *J* 6.0 Hz, H-1’), 4.91-4.86 (0.5H, dd, *J* 4.9, 6.0 Hz, H-2’), 4.83 (0.5H, dd, *J* 4.3, 6.2 Hz, H-2’), 4.40 (0.5H, app q, *J* 3.6 Hz, H-4’), 4.36 – 4.23 (1.5H, m, H-3’, H-4’), 4.02 – 3.82 (1H, m, CH2CH2CN), 3.79 (3H, m, ArOCH3), 3.78 (3H, m, ArOCH3) 3.73 (3H, s, NCH3), 3.68 – 3.50 (4H, m, CH2CH2CN, HA-5′, CH(CH3)2), 3.43 (0.5H, dd, J 10.5, 3.3, HA-5’), 3.24 (1H, 3.30-3.19, HB-5’), 2.65 (1H, t, *J* 6.6 Hz, CH2CH2CN), 2.34-2.20 (1H, m, CH2CH2CN), 1.22 – 1.14 (9H, m, CH(CH3)2), 1.02 (3H, d, *J* 6.7 Hz, CH(CH3)2), 0.85 – 0.79 (9H, s, SiC(CH3)3), 0.02 (1.5H, s, Si(CH3)2), 0.00 (1.5H, s, Si(CH3)2), -0.11 (1.5H, s, Si(CH3)2), -0.12 (1.5H, s, Si(CH3)2).

δC (101 MHz, CDCl3) 177.05 (CO), 177.00 (CO), 158.52 (4 x ArC), 147.63 (C-6), 147.55 (C-6), 146.68 (C-2), 146.55 (C-2), 145.61 (2 x C-4), 144.69 (ArC), 144.55 (ArC), 138.81 (CH-8), 138.57 (CH-8), 135.88 (ArC), 135.86 (ArC), 135.81 (ArC), 135.71 (ArC), 135.55 (ArC), 135.54 (ArC), 131.80 (2 x ArCH), 130.13 (ArCH), 130.11 (ArCH), 130.07 (2 x ArCH), 129.74 (4 x ArCH), 128.18 (ArCH), 128.04 (ArCH), 128.00 (ArCH), 127.89 (ArCH), 127.85 (ArCH), 126.87 (ArCH), 122.72 (C-5), 122.57 (C-5), 117.53 (CN), 117.22 (CN), 113.21 (ArCH), 113.15 (ArCH), 88.35 (CH-1′), 87.94 (CH-1′), 86.59 (CAr3), 86.42 (CAr3), 84.00 (CH-4′), 83.53 (CH-4’), 83.51 (d, *J* 4.1 Hz, CH-4’), 75.44 (d, *J* 1.9 Hz, CH-2’), 74.62 (d, *J* 5.8 Hz, CH-2’), 73.14 (d, *J* 9.6 Hz, CH-3’), 72.62 (d, *J* 15.2 Hz, CH-3’), 63.41 (CH2-5′), 63.31 (CH2-5′), 58.78 (d, *J* 16.8 Hz, CH2CH2CN), 57.63 (d, *J* 20.7 Hz, CH2CH2CN), 55.27 (ArOCH3), 55.24 (ArOCH3), 43.40 (d, *J* 12.8 Hz, CH(CH3)2), 42.94 (d, *J* 12.7 Hz, CH(CH3)2), 36.88 (2 x NCH3), 25.70 (3 xSiC(CH3)3), 25.66 (3 xSiC(CH3)3), 24.78 (CH(CH3)2), 24.68 (CH(CH3)2), 24.62 (CH(CH3)2), 24.60 (CH(CH3)2), 24.52 (CH(CH3)2), 20.37 (d, *J* 6.2 Hz, CH2CH2CN), 20.01 (d, *J* 6.9 Hz, CH2CH2CN), 17.97 (Si(CH3)2), 17.89 (Si(CH3)2), -4.62 (Si(CH3)2), -4.66 (Si(CH3)2), -4.69 (Si(CH3)2), -4.93 (Si(CH3)2), -5.00 (Si(CH3)2).

δP (162 MHz, CDCl3) 150.90, 149.25.

HRMS (ESI+) calculated for C54H70N7O8P1Si (M+H)+ 1002.4709, found 1002.4700.
