# Supplementary material
Source: HighWire-hosted journal article supplement (doi:10.1101/rna.079615.123)
Supplement: Supplemental_Table_S1.docx [file Supplemental_Table_S1.docx]

| **Column1** | **Column2** | **Column3** |
| --- | --- | --- |
| ID | Gene Name | Species |
| APC | APC, WNT signaling pathway regulator(APC) | Gallus gallus |
| RAF1 | Raf-1 proto-oncogene, serine/threonine kinase(RAF1) | Gallus gallus |
| ARHGAP35 | Rho GTPase activating protein 35(ARHGAP35) | Gallus gallus |
| ARHGEF12 | Rho guanine nucleotide exchange factor (GEF) 12(ARHGEF12) | Gallus gallus |
| ARHGEF7 | Rho guanine nucleotide exchange factor (GEF) 7(ARHGEF7) | Gallus gallus |
| ROCK2 | Rho-associated, coiled-coil containing protein kinase 2(ROCK2) | Gallus gallus |
| SOS1 | SOS Ras/Rac guanine nucleotide exchange factor 1(SOS1) | Gallus gallus |
| ACTB | actin, beta(ACTB) | Gallus gallus |
| EGFR | epidermal growth factor receptor(EGFR) | Gallus gallus |
| FGF10 | fibroblast growth factor 10(FGF10) | Gallus gallus |
| FGF3 | fibroblast growth factor 3(FGF3) | Gallus gallus |
| FGFR3 | fibroblast growth factor receptor 3(FGFR3) | Gallus gallus |
| GNA13 | guanine nucleotide binding protein (G protein), alpha 13(GNA13) | Gallus gallus |
| PIK3CA | phosphatidylinositol-4,5-bisphosphate 3-kinase, catalytic subunit alpha(PIK3CA) | Gallus gallus |
| PIK3CD | phosphatidylinositol-4,5-bisphosphate 3-kinase, catalytic subunit delta(PIK3CD) | Gallus gallus |
| PIP4K2A | phosphatidylinositol-5-phosphate 4-kinase, type II, alpha(PIP4K2A) | Gallus gallus |
| PIK3R1 | phosphoinositide-3-kinase, regulatory subunit 1 (alpha)(PIK3R1) | Gallus gallus |
| PDGFRA | platelet-derived growth factor receptor, alpha polypeptide(PDGFRA) | Gallus gallus |
| PTK2 | protein tyrosine kinase 2(PTK2) | Gallus gallus |
| CRK | v-crk avian sarcoma virus CT10 oncogene homolog(CRK) | Gallus gallus |
| CRKL | v-crk avian sarcoma virus CT10 oncogene homolog-like(CRKL) | Gallus gallus |
| SRC | v-src avian sarcoma (Schmidt-Ruppin A-2) viral oncogene homolog(SRC) | Gallus gallus |

Supplementary Table S1

List of genes for ‘Regulation of actin cytoskeleton’ KEGG pathway for the 3′ UTR methylated chicken transcripts conserved between chicken and mouse
