# Supplementary material
Source: HighWire-hosted journal article supplement (doi:10.1101/rna.079615.123)
Supplement: Supplemental_Table_S2.docx [file Supplemental_Table_S2.docx]

| **Category** | **Term** | **RT** | **Count** | **%** | **P-Value** | **Benjamini** |
| --- | --- | --- | --- | --- | --- | --- |
| KEGG_PATHWAY | ErbB signaling pathway | RT | 16 | 1.6 | 1.10E-04 | 1.30E-02 |
| KEGG_PATHWAY | Focal adhesion | RT | 26 | 2.7 | 3.50E-04 | 2.00E-02 |
| KEGG_PATHWAY | Wnt signaling pathway | RT | 19 | 1.9 | 6.70E-04 | 2.50E-02 |
| KEGG_PATHWAY | Insulin signaling pathway | RT | 18 | 1.8 | 1.20E-03 | 3.40E-02 |
| KEGG_PATHWAY | Ubiquitin mediated proteolysis | RT | 18 | 1.8 | 2.60E-03 | 4.90E-02 |
| KEGG_PATHWAY | MAPK signaling pathway | RT | 26 | 2.7 | 2.70E-03 | 4.90E-02 |
| KEGG_PATHWAY | Regulation of actin cytoskeleton | RT | 22 | 2.2 | 5.70E-03 | 9.00E-02 |
| KEGG_PATHWAY | Glycosaminoglycan biosynthesis - keratan sulfate | RT | 5 | 0.5 | 1.10E-02 | 1.40E-01 |
| KEGG_PATHWAY | Cell cycle | RT | 15 | 1.5 | 1.20E-02 | 1.40E-01 |
| KEGG_PATHWAY | Dorso-ventral axis formation | RT | 6 | 0.6 | 1.20E-02 | 1.40E-01 |
| KEGG_PATHWAY | Notch signaling pathway | RT | 8 | 0.8 | 2.30E-02 | 2.30E-01 |
| KEGG_PATHWAY | FoxO signaling pathway | RT | 15 | 1.5 | 2.50E-02 | 2.30E-01 |
| KEGG_PATHWAY | VEGF signaling pathway | RT | 9 | 0.9 | 3.20E-02 | 2.70E-01 |
| KEGG_PATHWAY | Phosphatidylinositol signaling system | RT | 12 | 1.2 | 3.50E-02 | 2.80E-01 |
| KEGG_PATHWAY | Jak-STAT signaling pathway | RT | 14 | 1.4 | 3.80E-02 | 2.80E-01 |
| KEGG_PATHWAY | Glycosphingolipid biosynthesis - lacto and neolacto series | RT | 5 | 0.5 | 4.50E-02 | 3.10E-01 |
| KEGG_PATHWAY | Endocytosis | RT | 22 | 2.2 | 5.00E-02 | 3.30E-01 |

Supplementary Table S2

The KEGG pathway enrichment for the 3′ UTR methylated chicken transcripts conserved between chicken and mouse
