# Supplementary material
Source: HighWire-hosted journal article supplement (doi:10.1101/rna.079615.123)
Supplement: Supplemental_Table_S3.docx [file Supplemental_Table_S3.docx]

**Table S3.** Oligonucleotides used in this study.

| **Oligonucleotide** | **Sequence (5**′ **– 3**′**)** |
| --- | --- |
| RNA-A | gcuucuaggcggacuguua |
| RNA-m6A | gcuucuaggcgg-m6A-cuguua |
| Chicken *ACT1* zipcode unmodified | accggacuguuaccaacacccacacccc |
| Chicken *ACT1* zipcode m6A (Site 1202) | accgg-m6A-cuguuaccaacacccacacccc |
| Chicken *ACT1* zipcode m6A (Site 1211) | accggacuguuacca-m6A-cacccacacccc |
| Chicken *ACT1* zipcode m6A (Site 1212) | accggacuguuacc-m6A-acacccacacccc |
| Chicken *ACT1* zipcode m6A (Site 1218) | accggacuguuaccaacaccc-m6A-cacccc |
| ssDNA | GGACTTGACGACTTACGGACCTTACGGACTCACCCATCGG |
| Human 28S (Site A4190) RedBaron Chimera | [2OMeC] [2OMeA] [2OMeC] [2OMeC] [2OMeU] [2OMeG] [2OMeC] [2OMeG]TTAC[2OMeC] [2OMeG] [2OMeU] [2OMeU] [2OMeU] [2OMeG] [2OMeA] [2OMeC] |
| Human 28S (Site A4190) RedBaron Splint | GTCCGTAAGTCGTCAAGTCCTTACCGTTTGACAGGTGTAC |
| Chicken *ACT1* zipcode m6A (Site 1202) RedBaron Chimera | [2OMeG] [2OMeU] [2OMeA] [2OMeA] [2OMeC] [2OMeA] [2OMeG]TCCG[2OMeG] [2OMeU] [2OMeU] [2OMeU] [2OMeA] [2OMeG] [2OMeA] |
| Chicken *ACT1* zipcode m6A (Site 1202) RedBaron Splint | GTCCGTAAGTCGTCAAGTCCTCCGGTTTAGAAGCATTTGC |
| Chicken *ACT1* zipcode m6A (Site 1218) RedBaron Chimera | [2OMeA] [2OMeG] [2OMeG] [2OMeG] [2OMeG] [2OMeU] [2OMeG]TGGG[2OMeU] [2OMeG] [2OMeU] [2OMeU] [2OMeG] [2OMeG] [2OMeU] |
| Chicken *ACT1* zipcode m6A (Site 1218) RedBaron Splint | GTCCGTAAGTCGTCAAGTCCTGGGTGTTGGTAACAGTCCG |
| Chicken *ACT1* biotinylated oligo for the *ACT1* mRNA depletion | ggaagagggcctcggggcac**c-biotin** |
| Arabidopsis XRN4 site1 m6A RedBaron chimera |  |
| Arabidopsis XRN4 site1m6A redBaron splint | GTCCGTAAGTCGTCAAGTCC TCCAAAGGTACATTATACATTTGC |
| Arabidopsis XRN4 site 2 m6A RedBaron chimera | [2OMeG][2OMeG][2OMeA] [2OMeC] [2OMeU] [2OMeC] [2OMeU] [2OMeA] [2OMeA] [2OMeA] [2OMeC] [2OMeA] [2OMeA] [2OMeG] **ttta**[2OMeA] [2OMeU] [2OMeG] [2OMeU] [2OMeA] [2OMeA] [2OMeU] [2OMeA] [2OMeA] [2OMeG] [2OMeU] [2OMeA] [2OMeU] [2OMeA] |
| Arabidopsis XRN4 site 2 m6A redBaron splint | GTCCGTAAGTCGTCAAGTCC TTTAATGTAATAAGTATATATAACAAAAG |
| Arabidopsis XRN4 site 3 m6A RedBaron chimera | [2OMeG][2OMeA] [2OMeA] [2OMeG] [2OMeA] [2OMeA] [2OMeA] [2OMeC] [2OMeA] [2OMeG] [2OMeA] [2OMeG] [2OMeA][2OMeG] **tcga** [2OMeA] [2OMeU] [2OMeA] [2OMeA] [2OMeC] [2OMeA] [2OMeU] [2OMeC] [2OMeC] [2OMeA] [2OMeA] [2OMeU] [2OMeU] [2OMeG] |
| Arabidopsis XRN4 site 3 m6A RedBaron splint | GTCCGTAAGTCGTCAAGTCC TCGAATAACATCCAATTGCCAAGAG |
